# Supplementary material for: Network Pharmacology Reveals That Resveratrol Can Alleviate COVID-19-Related Hyperinflammation
Source: Hindawi journal article supplement (doi:10.1155/2021/4129993), 2021-09-22
Supplement: f1 [file 4129993.f1.pdf]

## Resveratrol related targets

| Database                            | Targets | Overlapping targets | Gene ID |
|-------------------------------------|---------|---------------------|---------|
| Comparative Toxicogenomics Database | AACS    | MMP2                | 4313    |
| Comparative Toxicogenomics Database | AATF    | XDH                 | 7498    |
| Comparative Toxicogenomics Database | ABCA1   | CXCR4               | 7852    |
| Comparative Toxicogenomics Database | ABCA6   | HSD17B2             | 3294    |
| Comparative Toxicogenomics Database | ABCB1   | MMP7                | 4316    |
| Comparative Toxicogenomics Database | ABCB1B  | PRKCG               | 5582    |
| Comparative Toxicogenomics Database | ABCB9   | NOS2                | 4843    |
| Comparative Toxicogenomics Database | ABCC1   | FGFR1               | 2260    |
| Comparative Toxicogenomics Database | ABCC2   | MET                 | 4233    |
| Comparative Toxicogenomics Database | ABCC3   | MTNR1B              | 4544    |
| Comparative Toxicogenomics Database | ABCC4   | CASP6               | 839     |
| Comparative Toxicogenomics Database | ABCC5   | CDC25B              | 994     |
| Comparative Toxicogenomics Database | ABCC8   | CYP2D6              | 1565    |
| Comparative Toxicogenomics Database | ABCC9   | PRKCB               | 5579    |
| Comparative Toxicogenomics Database | ABCD2   | CYP2C19             | 1557    |
| Comparative Toxicogenomics Database | ABCD4   | SMO                 | 6608    |
| Comparative Toxicogenomics Database | ABCF1   | ROCK2               | 9475    |
| Comparative Toxicogenomics Database | ABCF2   | IMPDH2              | 3615    |
| Comparative Toxicogenomics Database | ABCG1   | MAOA                | 4128    |
| Comparative Toxicogenomics Database | ABCG2   | GRB2                | 2885    |
| Comparative Toxicogenomics Database | ABHD11  | CDK1                | 983     |
| Comparative Toxicogenomics Database | ABHD15  | PTK2                | 5747    |
| Comparative Toxicogenomics Database | ABHD6   | BCHE                | 590     |
| Comparative Toxicogenomics Database | ABI1    | BCL2                | 596     |
| Comparative Toxicogenomics Database | ABITRAM | PIK3CB              | 5291    |
| Comparative Toxicogenomics Database | ABL1    | GCK                 | 2645    |
| Comparative Toxicogenomics Database | ABLIM1  | THRB                | 7068    |
| Comparative Toxicogenomics Database | ABTB2   | BACE2               | 25825   |
| Comparative Toxicogenomics Database | ABU-11  | OXTR                | 5021    |
| Comparative Toxicogenomics Database | ABU-15  | PTGES               | 9536    |
| Comparative Toxicogenomics Database | ABU-2   | CHRM1               | 1128    |
| Comparative Toxicogenomics Database | ABU-3   | AURKA               | 6790    |
| Comparative Toxicogenomics Database | ABU-5   | SRD5A2              | 6716    |
| Comparative Toxicogenomics Database | ABU-6   | PTGER1              | 5731    |
| Comparative Toxicogenomics Database | ABU-7   | AHR                 | 196     |
| Comparative Toxicogenomics Database | ABU-8   | DHFR                | 1719    |
| Comparative Toxicogenomics Database | ACAA1A  | HDAC3               | 8841    |
| Comparative Toxicogenomics Database | ACAA2   | BTK                 | 695     |
| Comparative Toxicogenomics Database | ACACA   | ECE1                | 1889    |
| Comparative Toxicogenomics Database | ACACB   | HCK                 | 3055    |
| Comparative Toxicogenomics Database | ACADL   | CYP19A1             | 1588    |
| Comparative Toxicogenomics Database | ACADM   | PDGFRB              | 5159    |
| Comparative Toxicogenomics Database | ACADS   | ADRB1               | 153     |
| Comparative Toxicogenomics Database | ACADSB  | TNF                 | 7124    |
| Comparative Toxicogenomics Database | ACAN    | SIRT2               | 22933   |
| Comparative Toxicogenomics Database | ACAT1   | FYN                 | 2534    |
| Comparative Toxicogenomics Database | ACE     | ITGB1               | 3688    |
| Comparative Toxicogenomics Database | ACER2   | TUBA1A              | 7846    |
| Comparative Toxicogenomics Database | ACHE    | DPP7                | 29952   |
| Comparative Toxicogenomics Database | ACIN1   | JAK2                | 3717    |
| Comparative Toxicogenomics Database | ACLY    | CASP1               | 834     |
| Comparative Toxicogenomics Database | ACMSD   | F2                  | 2147    |
| Comparative Toxicogenomics Database | ACNAT2  | XIAP                | 331     |
| Comparative Toxicogenomics Database | ACOT13  | FDFT1               | 2222    |
| Comparative Toxicogenomics Database | ACOT2   | PTGS2               | 5743    |
| Comparative Toxicogenomics Database | ACOT4   | CYP2C9              | 1559    |

|                                     |         |          |        |
|-------------------------------------|---------|----------|--------|
| Comparative Toxicogenomics Database | ACOT7   | CTSK     | 1513   |
| Comparative Toxicogenomics Database | ACOT9   | NPY1R    | 4886   |
| Comparative Toxicogenomics Database | ACOX1   | ESR1     | 2099   |
| Comparative Toxicogenomics Database | ACP1    | CDK4     | 1019   |
| Comparative Toxicogenomics Database | ACP5    | TYMS     | 7298   |
| Comparative Toxicogenomics Database | ACP6    | PIM3     | 415116 |
| Comparative Toxicogenomics Database | ACSL3   | PDE4D    | 5144   |
| Comparative Toxicogenomics Database | ACSL4   | MME      | 4311   |
| Comparative Toxicogenomics Database | ACSL5   | PSEN2    | 5664   |
| Comparative Toxicogenomics Database | ACSM2A  | GSK3B    | 2932   |
| Comparative Toxicogenomics Database | ACSM3   | MMP1     | 4312   |
| Comparative Toxicogenomics Database | ACTA1   | PTGER4   | 5734   |
| Comparative Toxicogenomics Database | ACTA2   | WEE1     | 7465   |
| Comparative Toxicogenomics Database | ACTB    | NR2F2    | 7026   |
| Comparative Toxicogenomics Database | ACTN1   | BCL2A1   | 597    |
| Comparative Toxicogenomics Database | ACTN2   | CCR4     | 1233   |
| Comparative Toxicogenomics Database | ACTN4   | PPARD    | 5467   |
| Comparative Toxicogenomics Database | ACTR3   | HMGCR    | 3156   |
| Comparative Toxicogenomics Database | ACYP1   | FLT1     | 2321   |
| Comparative Toxicogenomics Database | ADAM10  | MMP3     | 4314   |
| Comparative Toxicogenomics Database | ADAM17  | DUSP3    | 1845   |
| Comparative Toxicogenomics Database | ADAM9   | CA4      | 762    |
| Comparative Toxicogenomics Database | ADAMTS4 | MAPK1    | 5594   |
| Comparative Toxicogenomics Database | ADCY4   | ALOX5AP  | 241    |
| Comparative Toxicogenomics Database | ADCY9   | PLAT     | 5327   |
| Comparative Toxicogenomics Database | ADD3    | MDM2     | 4193   |
| Comparative Toxicogenomics Database | ADGB    | AKT2     | 208    |
| Comparative Toxicogenomics Database | ADGRD1  | EGFR     | 1956   |
| Comparative Toxicogenomics Database | ADGRE5  | IKBKB    | 3551   |
| Comparative Toxicogenomics Database | ADGRF2  | CXCR3    | 2833   |
| Comparative Toxicogenomics Database | ADH1B   | ERBB2    | 2064   |
| Comparative Toxicogenomics Database | ADI1    | PDE5A    | 8654   |
| Comparative Toxicogenomics Database | ADIG    | MAPK8    | 5599   |
| Comparative Toxicogenomics Database | ADIPOQ  | F2R      | 2149   |
| Comparative Toxicogenomics Database | ADIPOR1 | ADORA3   | 140    |
| Comparative Toxicogenomics Database | ADIPOR2 | ABL1     | 25     |
| Comparative Toxicogenomics Database | ADM     | CCNE2    | 9134   |
| Comparative Toxicogenomics Database | ADORA1  | AKR1B1   | 231    |
| Comparative Toxicogenomics Database | ADORA2A | HSP90AB1 | 3326   |
| Comparative Toxicogenomics Database | ADORA3  | CHEK2    | 11200  |
| Comparative Toxicogenomics Database | ADRB1   | TERT     | 7015   |
| Comparative Toxicogenomics Database | AFF4    | METAP2   | 10988  |
| Comparative Toxicogenomics Database | AFTPH   | SRC      | 6714   |
| Comparative Toxicogenomics Database | AGER    | CDK2     | 1017   |
| Comparative Toxicogenomics Database | AGPAT4  | PGR      | 5241   |
| Comparative Toxicogenomics Database | AGPS    | THRA     | 7067   |
| Comparative Toxicogenomics Database | AGR2    | CYP17A1  | 1586   |
| Comparative Toxicogenomics Database | AGR3    | CASP9    | 842    |
| Comparative Toxicogenomics Database | AGT     | PRKCQ    | 5588   |
| Comparative Toxicogenomics Database | AGTR1   | ADAM17   | 6868   |
| Comparative Toxicogenomics Database | AGTR1A  | ACACB    | 32     |
| Comparative Toxicogenomics Database | AGTRAP  | PDGFRA   | 5156   |
| Comparative Toxicogenomics Database | AHCTF1  | PRKACA   | 5566   |
| Comparative Toxicogenomics Database | AHCY    | HDAC1    | 3065   |
| Comparative Toxicogenomics Database | AHNAK   | SIRT1    | 23411  |
| Comparative Toxicogenomics Database | AHR     | CHRM3    | 1131   |
| Comparative Toxicogenomics Database | AHRR    | P2RX7    | 5027   |
| Comparative Toxicogenomics Database | AHSA2   | ESR2     | 2100   |

|                                     |          |         |        |
|-------------------------------------|----------|---------|--------|
| Comparative Toxicogenomics Database | AHSG     | BRAF    | 673    |
| Comparative Toxicogenomics Database | AIF1     | AKT3    | 10000  |
| Comparative Toxicogenomics Database | AIF1L    | ITGAL   | 3683   |
| Comparative Toxicogenomics Database | AIFM1    | MLYCD   | 23417  |
| Comparative Toxicogenomics Database | AIMP2    | ALPL    | 249    |
| Comparative Toxicogenomics Database | AK2      | PNP     | 4860   |
| Comparative Toxicogenomics Database | AK6      | S1PR3   | 1903   |
| Comparative Toxicogenomics Database | AKAP8    | CCNA1   | 8900   |
| Comparative Toxicogenomics Database | AKAP9    | PLAU    | 5328   |
| Comparative Toxicogenomics Database | AKR1B1   | RAC1    | 5879   |
| Comparative Toxicogenomics Database | AKR1B10  | MMP13   | 4322   |
| Comparative Toxicogenomics Database | AKR1B3   | ALOX5   | 240    |
| Comparative Toxicogenomics Database | AKR1C3   | RXRA    | 6256   |
| Comparative Toxicogenomics Database | AKT1     | NOS1    | 4842   |
| Comparative Toxicogenomics Database | AKT1S1   | NR1H3   | 10062  |
| Comparative Toxicogenomics Database | AKT2     | ACACA   | 31     |
| Comparative Toxicogenomics Database | AKT3     | PLK1    | 5347   |
| Comparative Toxicogenomics Database | AKTS1    | PLA2G2A | 5320   |
| Comparative Toxicogenomics Database | ALB      | KIF11   | 3832   |
| Comparative Toxicogenomics Database | ALDH18A1 | BDKRB2  | 624    |
| Comparative Toxicogenomics Database | ALDH1A1  | ADORA2A | 135    |
| Comparative Toxicogenomics Database | ALDH1A2  | KCNH2   | 3757   |
| Comparative Toxicogenomics Database | ALDH1A3  | LIPE    | 3991   |
| Comparative Toxicogenomics Database | ALDH1B1  | CASP8   | 841    |
| Comparative Toxicogenomics Database | ALDH1L2  | PPARG   | 5468   |
| Comparative Toxicogenomics Database | ALDH2    | ALOX15  | 246    |
| Comparative Toxicogenomics Database | ALDH3A2  | PRKCD   | 5580   |
| Comparative Toxicogenomics Database | ALDH3B2  | RET     | 5979   |
| Comparative Toxicogenomics Database | ALDH4A1  | MAPK9   | 5601   |
| Comparative Toxicogenomics Database | ALDH9A1  | SELE    | 6401   |
| Comparative Toxicogenomics Database | ALDOA    | ABCB1   | 5243   |
| Comparative Toxicogenomics Database | ALDOC    | PIM1    | 5292   |
| Comparative Toxicogenomics Database | ALG14    | NR3C1   | 2908   |
| Comparative Toxicogenomics Database | ALG8     | MTOR    | 2475   |
| Comparative Toxicogenomics Database | ALG9     | MAPK14  | 1432   |
| Comparative Toxicogenomics Database | ALKBH2   | CTSS    | 1520   |
| Comparative Toxicogenomics Database | ALOX12   | RAF1    | 5894   |
| Comparative Toxicogenomics Database | ALOX15   | CCR2    | 729230 |
| Comparative Toxicogenomics Database | ALOX5    | ITGAV   | 3685   |
| Comparative Toxicogenomics Database | ALOX5AP  | SCD     | 6319   |
| Comparative Toxicogenomics Database | ALPI     | EGLN1   | 54583  |
| Comparative Toxicogenomics Database | ALPL     | GRIN2B  | 2904   |
| Comparative Toxicogenomics Database | ALYREF   | PDPK1   | 5170   |
| Comparative Toxicogenomics Database | AMD1     | TNK2    | 10188  |
| Comparative Toxicogenomics Database | AMFR     | ADAM10  | 102    |
| Comparative Toxicogenomics Database | AMH      | TGFBR1  | 7046   |
| Comparative Toxicogenomics Database | AMMECR1  | P2RY12  | 64805  |
| Comparative Toxicogenomics Database | AMOTL1   | CDC42   | 998    |
| Comparative Toxicogenomics Database | ANAPC1   | AGTR1   | 185    |
| Comparative Toxicogenomics Database | ANAPC16  | MC1R    | 4157   |
| Comparative Toxicogenomics Database | ANGPTL4  | CASP7   | 840    |
| Comparative Toxicogenomics Database | ANKRD1   | CCKBR   | 887    |
| Comparative Toxicogenomics Database | ANKRD18A | CTSD    | 1509   |
| Comparative Toxicogenomics Database | ANLN     | ACHE    | 43     |
| Comparative Toxicogenomics Database | ANO1     | SIGMAR1 | 10280  |
| Comparative Toxicogenomics Database | ANP32E   | MTNR1A  | 4543   |
| Comparative Toxicogenomics Database | ANXA1    | MCL1    | 4170   |
| Comparative Toxicogenomics Database | ANXA11   | EPHX2   | 2053   |

|                                     |          |          |       |
|-------------------------------------|----------|----------|-------|
| Comparative Toxicogenomics Database | ANXA2    | CDC7     | 8317  |
| Comparative Toxicogenomics Database | ANXA3    | CASP3    | 836   |
| Comparative Toxicogenomics Database | ANXA4    | HSP90AA1 | 3320  |
| Comparative Toxicogenomics Database | ANXA5    | PARP1    | 142   |
| Comparative Toxicogenomics Database | AOX1     | CLK1     | 1195  |
| Comparative Toxicogenomics Database | AOX3     | ACE      | 1636  |
| Comparative Toxicogenomics Database | AP2A1    | ROCK1    | 6093  |
| Comparative Toxicogenomics Database | AP2A2    | KDR      | 3791  |
| Comparative Toxicogenomics Database | AP2B1    | ABCG2    | 9429  |
| Comparative Toxicogenomics Database | AP3D1    | RARA     | 5914  |
| Comparative Toxicogenomics Database | AP3M1    | PTPN1    | 5770  |
| Comparative Toxicogenomics Database | APAF1    | PDE2A    | 5138  |
| Comparative Toxicogenomics Database | APBB1    | PPARA    | 5465  |
| Comparative Toxicogenomics Database | APCS     | MGLL     | 11343 |
| Comparative Toxicogenomics Database | APEX1    | CCR1     | 1230  |
| Comparative Toxicogenomics Database | API5     | ITGA2B   | 3674  |
| Comparative Toxicogenomics Database | APLN     | MAOB     | 4129  |
| Comparative Toxicogenomics Database | APOA1    | CYP1A2   | 1544  |
| Comparative Toxicogenomics Database | APOA4    | PYGL     | 5836  |
| Comparative Toxicogenomics Database | APOB     | DNMT1    | 1786  |
| Comparative Toxicogenomics Database | APOBEC3B | PIK3CG   | 5294  |
| Comparative Toxicogenomics Database | APOC1    | PIK3CA   | 5290  |
| Comparative Toxicogenomics Database | APOE     | ADORA1   | 134   |
| Comparative Toxicogenomics Database | A POM    | SYK      | 6850  |
| Comparative Toxicogenomics Database | APOV1    | CHRNA4   | 1137  |
| Comparative Toxicogenomics Database | APP      | CCKAR    | 886   |
| Comparative Toxicogenomics Database | APPBP2   | IGF1R    | 3480  |
| Comparative Toxicogenomics Database | APRT     | ICAM1    | 3383  |
| Comparative Toxicogenomics Database | AQP1     | BCL2L1   | 598   |
| Comparative Toxicogenomics Database | AQP3     | SLC9A1   | 6548  |
| Comparative Toxicogenomics Database | AR       | HDAC2    | 3066  |
| Comparative Toxicogenomics Database | ARAF     | CA2      | 760   |
| Comparative Toxicogenomics Database | ARC      | HNF4A    | 3172  |
| Comparative Toxicogenomics Database | AREG     | CDK5R1   | 8851  |
| Comparative Toxicogenomics Database | ARF1     | RELA     | 5970  |
| Comparative Toxicogenomics Database | ARF4     | NOS3     | 4846  |
| Comparative Toxicogenomics Database | ARF5     | KCNA5    | 3741  |
| Comparative Toxicogenomics Database | ARFGEF1  | CHRM2    | 1129  |
| Comparative Toxicogenomics Database | ARFGEF3  | NR1H4    | 9971  |
| Comparative Toxicogenomics Database | ARG1     | SERPINE1 | 5054  |
| Comparative Toxicogenomics Database | ARG2     | VCAM1    | 7412  |
| Comparative Toxicogenomics Database | ARHGAP5  | DYRK1A   | 1859  |
| Comparative Toxicogenomics Database | ARHGAP9  | CDK5     | 1020  |
| Comparative Toxicogenomics Database | ARHGDI A | JAK1     | 3716  |
| Comparative Toxicogenomics Database | ARHGEF2  | AKT1     | 207   |
| Comparative Toxicogenomics Database | ARID1B   | CCR5     | 1234  |
| Comparative Toxicogenomics Database | ARID4A   | SLC5A1   | 6523  |
| Comparative Toxicogenomics Database | ARL1     | MAP2K1   | 5604  |
| Comparative Toxicogenomics Database | ARL2     | ITGB3    | 3690  |
| Comparative Toxicogenomics Database | ARL3     | HSD11B1  | 3290  |
| Comparative Toxicogenomics Database | ARL6     | GSK3A    | 2931  |
| Comparative Toxicogenomics Database | ARL8B    | AKR1C3   | 8644  |
| Comparative Toxicogenomics Database | ARNT     | PTGS1    | 5742  |
| Comparative Toxicogenomics Database | ARPC1B   | F3       | 2152  |
| Comparative Toxicogenomics Database | ARPC4    | CSF1R    | 1436  |
| Comparative Toxicogenomics Database | ARPC5    | DHODH    | 1723  |
| Comparative Toxicogenomics Database | ARPC5L   | AR       | 367   |
| Comparative Toxicogenomics Database | ARPP21   | FDPS     | 2224  |

|                                     |          |         |      |
|-------------------------------------|----------|---------|------|
| Comparative Toxicogenomics Database | ARRB2    | CYP3A4  | 1576 |
| Comparative Toxicogenomics Database | ARSG     | APP     | 351  |
| Comparative Toxicogenomics Database | ASAH1    | RPS6KB1 | 6198 |
| Comparative Toxicogenomics Database | ASAP1    | MMP9    | 4318 |
| Comparative Toxicogenomics Database | ASCL1    |         |      |
| Comparative Toxicogenomics Database | ASF1B    |         |      |
| Comparative Toxicogenomics Database | ASH1L    |         |      |
| Comparative Toxicogenomics Database | ASH2L    |         |      |
| Comparative Toxicogenomics Database | ASNS     |         |      |
| Comparative Toxicogenomics Database | ASPH     |         |      |
| Comparative Toxicogenomics Database | ASPM     |         |      |
| Comparative Toxicogenomics Database | ASS1     |         |      |
| Comparative Toxicogenomics Database | ATAD2    |         |      |
| Comparative Toxicogenomics Database | ATE1     |         |      |
| Comparative Toxicogenomics Database | ATF1     |         |      |
| Comparative Toxicogenomics Database | ATF2     |         |      |
| Comparative Toxicogenomics Database | ATF3     |         |      |
| Comparative Toxicogenomics Database | ATF4     |         |      |
| Comparative Toxicogenomics Database | ATF6     |         |      |
| Comparative Toxicogenomics Database | ATG101   |         |      |
| Comparative Toxicogenomics Database | ATG12    |         |      |
| Comparative Toxicogenomics Database | ATG3     |         |      |
| Comparative Toxicogenomics Database | ATG5     |         |      |
| Comparative Toxicogenomics Database | ATL2     |         |      |
| Comparative Toxicogenomics Database | ATL3     |         |      |
| Comparative Toxicogenomics Database | ATM      |         |      |
| Comparative Toxicogenomics Database | ATOX1    |         |      |
| Comparative Toxicogenomics Database | ATP13A1  |         |      |
| Comparative Toxicogenomics Database | ATP1A1   |         |      |
| Comparative Toxicogenomics Database | ATP1B1   |         |      |
| Comparative Toxicogenomics Database | ATP1B3   |         |      |
| Comparative Toxicogenomics Database | ATP2A2   |         |      |
| Comparative Toxicogenomics Database | ATP2A3   |         |      |
| Comparative Toxicogenomics Database | ATP5A1   |         |      |
| Comparative Toxicogenomics Database | ATP5C1   |         |      |
| Comparative Toxicogenomics Database | ATP5E    |         |      |
| Comparative Toxicogenomics Database | ATP5F1A  |         |      |
| Comparative Toxicogenomics Database | ATP5F1B  |         |      |
| Comparative Toxicogenomics Database | ATP5F1C  |         |      |
| Comparative Toxicogenomics Database | ATP5G1   |         |      |
| Comparative Toxicogenomics Database | ATP5G2   |         |      |
| Comparative Toxicogenomics Database | ATP5G3   |         |      |
| Comparative Toxicogenomics Database | ATP5K    |         |      |
| Comparative Toxicogenomics Database | ATP5L    |         |      |
| Comparative Toxicogenomics Database | ATP5MC1  |         |      |
| Comparative Toxicogenomics Database | ATP5O    |         |      |
| Comparative Toxicogenomics Database | ATP5PB   |         |      |
| Comparative Toxicogenomics Database | ATP6V1F  |         |      |
| Comparative Toxicogenomics Database | ATP6V1G2 |         |      |
| Comparative Toxicogenomics Database | ATP8B2   |         |      |
| Comparative Toxicogenomics Database | ATP9B    |         |      |
| Comparative Toxicogenomics Database | ATPAF2   |         |      |
| Comparative Toxicogenomics Database | ATPIF1   |         |      |
| Comparative Toxicogenomics Database | ATR      |         |      |
| Comparative Toxicogenomics Database | ATRX     |         |      |
| Comparative Toxicogenomics Database | ATXN3    |         |      |
| Comparative Toxicogenomics Database | AUH      |         |      |
| Comparative Toxicogenomics Database | AURKA    |         |      |

|                                     |          |
|-------------------------------------|----------|
| Comparative Toxicogenomics Database | AURKB    |
| Comparative Toxicogenomics Database | AUTS2    |
| Comparative Toxicogenomics Database | AXIN2    |
| Comparative Toxicogenomics Database | B2M      |
| Comparative Toxicogenomics Database | 33GALNT1 |
| Comparative Toxicogenomics Database | B3GNT5   |
| Comparative Toxicogenomics Database | BACE2    |
| Comparative Toxicogenomics Database | BAD      |
| Comparative Toxicogenomics Database | BAG2     |
| Comparative Toxicogenomics Database | BAG3     |
| Comparative Toxicogenomics Database | BAG6     |
| Comparative Toxicogenomics Database | BAK1     |
| Comparative Toxicogenomics Database | BAP1     |
| Comparative Toxicogenomics Database | BARD1    |
| Comparative Toxicogenomics Database | BAX      |
| Comparative Toxicogenomics Database | BBC3     |
| Comparative Toxicogenomics Database | BBOX1    |
| Comparative Toxicogenomics Database | BBS1     |
| Comparative Toxicogenomics Database | BBS2     |
| Comparative Toxicogenomics Database | BCAP31   |
| Comparative Toxicogenomics Database | BCAR3    |
| Comparative Toxicogenomics Database | BCAS2    |
| Comparative Toxicogenomics Database | BCAS3    |
| Comparative Toxicogenomics Database | BCAT2    |
| Comparative Toxicogenomics Database | BCHE     |
| Comparative Toxicogenomics Database | BCL10    |
| Comparative Toxicogenomics Database | BCL2     |
| Comparative Toxicogenomics Database | BCL2A1   |
| Comparative Toxicogenomics Database | BCL2L1   |
| Comparative Toxicogenomics Database | BCL2L11  |
| Comparative Toxicogenomics Database | BCL2L12  |
| Comparative Toxicogenomics Database | BCL2L15  |
| Comparative Toxicogenomics Database | BCL2L2   |
| Comparative Toxicogenomics Database | BCL3     |
| Comparative Toxicogenomics Database | BCL6     |
| Comparative Toxicogenomics Database | BCOR     |
| Comparative Toxicogenomics Database | BCR      |
| Comparative Toxicogenomics Database | BCS1L    |
| Comparative Toxicogenomics Database | BDH1     |
| Comparative Toxicogenomics Database | BDKRB2   |
| Comparative Toxicogenomics Database | BDNF     |
| Comparative Toxicogenomics Database | BECN1    |
| Comparative Toxicogenomics Database | BET1     |
| Comparative Toxicogenomics Database | BEX2     |
| Comparative Toxicogenomics Database | BEX3     |
| Comparative Toxicogenomics Database | BEX4     |
| Comparative Toxicogenomics Database | BGLAP    |
| Comparative Toxicogenomics Database | BHLHE40  |
| Comparative Toxicogenomics Database | BHMT     |
| Comparative Toxicogenomics Database | BID      |
| Comparative Toxicogenomics Database | BIK      |
| Comparative Toxicogenomics Database | BIRC2    |
| Comparative Toxicogenomics Database | BIRC3    |
| Comparative Toxicogenomics Database | BIRC5    |
| Comparative Toxicogenomics Database | BIRC7    |
| Comparative Toxicogenomics Database | BLM      |
| Comparative Toxicogenomics Database | BLNK     |
| Comparative Toxicogenomics Database | BLVRA    |

|                                     |          |
|-------------------------------------|----------|
| Comparative Toxicogenomics Database | BMERB1   |
| Comparative Toxicogenomics Database | BMF      |
| Comparative Toxicogenomics Database | BMP2     |
| Comparative Toxicogenomics Database | BMP2K    |
| Comparative Toxicogenomics Database | BMP4     |
| Comparative Toxicogenomics Database | BMP5     |
| Comparative Toxicogenomics Database | BMP6     |
| Comparative Toxicogenomics Database | BMP7     |
| Comparative Toxicogenomics Database | BMPR1B   |
| Comparative Toxicogenomics Database | BMPR2    |
| Comparative Toxicogenomics Database | BNIP1    |
| Comparative Toxicogenomics Database | BNIP2    |
| Comparative Toxicogenomics Database | BOK      |
| Comparative Toxicogenomics Database | BORA     |
| Comparative Toxicogenomics Database | BRAF     |
| Comparative Toxicogenomics Database | BRAP     |
| Comparative Toxicogenomics Database | BRCA1    |
| Comparative Toxicogenomics Database | BRCA2    |
| Comparative Toxicogenomics Database | BRCC3    |
| Comparative Toxicogenomics Database | BRD7     |
| Comparative Toxicogenomics Database | BRF1     |
| Comparative Toxicogenomics Database | BRI3BP   |
| Comparative Toxicogenomics Database | BSCL2    |
| Comparative Toxicogenomics Database | BSG      |
| Comparative Toxicogenomics Database | BST2     |
| Comparative Toxicogenomics Database | BTF3     |
| Comparative Toxicogenomics Database | BTF3L4   |
| Comparative Toxicogenomics Database | BTG1     |
| Comparative Toxicogenomics Database | BTG2     |
| Comparative Toxicogenomics Database | BTK      |
| Comparative Toxicogenomics Database | BUB1     |
| Comparative Toxicogenomics Database | BUB1B    |
| Comparative Toxicogenomics Database | BUB3     |
| Comparative Toxicogenomics Database | BUD31    |
| Comparative Toxicogenomics Database | BYSL     |
| Comparative Toxicogenomics Database | BZW1     |
| Comparative Toxicogenomics Database | C11ORF91 |
| Comparative Toxicogenomics Database | C15ORF48 |
| Comparative Toxicogenomics Database | C1ORF112 |
| Comparative Toxicogenomics Database | C1ORF115 |
| Comparative Toxicogenomics Database | C1ORF116 |
| Comparative Toxicogenomics Database | C1QA     |
| Comparative Toxicogenomics Database | C1QB     |
| Comparative Toxicogenomics Database | C1QC     |
| Comparative Toxicogenomics Database | C1QL2    |
| Comparative Toxicogenomics Database | C1S      |
| Comparative Toxicogenomics Database | C2ORF69  |
| Comparative Toxicogenomics Database | C3       |
| Comparative Toxicogenomics Database | C3ORF52  |
| Comparative Toxicogenomics Database | C4B      |
| Comparative Toxicogenomics Database | C4BPB    |
| Comparative Toxicogenomics Database | C4ORF46  |
| Comparative Toxicogenomics Database | C5       |
| Comparative Toxicogenomics Database | C77080   |
| Comparative Toxicogenomics Database | C9ORF40  |
| Comparative Toxicogenomics Database | CA2      |
| Comparative Toxicogenomics Database | CA4      |
| Comparative Toxicogenomics Database | CACNA1C  |

Comparative Toxicogenomics Database CACNA2D1  
Comparative Toxicogenomics Database CACYBP  
Comparative Toxicogenomics Database CAD  
Comparative Toxicogenomics Database CALCA  
Comparative Toxicogenomics Database CALCR  
Comparative Toxicogenomics Database CALD1  
Comparative Toxicogenomics Database CALR  
Comparative Toxicogenomics Database CALU  
Comparative Toxicogenomics Database CAMK2A  
Comparative Toxicogenomics Database CAMK2N1  
Comparative Toxicogenomics Database CAMK4  
Comparative Toxicogenomics Database CAMP  
Comparative Toxicogenomics Database CANX  
Comparative Toxicogenomics Database CAP2  
Comparative Toxicogenomics Database CAPG  
Comparative Toxicogenomics Database CAPN9  
Comparative Toxicogenomics Database CAPNS1  
Comparative Toxicogenomics Database CAPRIN1  
Comparative Toxicogenomics Database CAPSL  
Comparative Toxicogenomics Database CAPZA2  
Comparative Toxicogenomics Database CAPZB  
Comparative Toxicogenomics Database CAR3  
Comparative Toxicogenomics Database CARD16  
Comparative Toxicogenomics Database CARHSP1  
Comparative Toxicogenomics Database CASP1  
Comparative Toxicogenomics Database CASP10  
Comparative Toxicogenomics Database CASP12  
Comparative Toxicogenomics Database CASP2  
Comparative Toxicogenomics Database CASP3  
Comparative Toxicogenomics Database CASP4  
Comparative Toxicogenomics Database CASP6  
Comparative Toxicogenomics Database CASP7  
Comparative Toxicogenomics Database CASP8  
Comparative Toxicogenomics Database CASP8AP2  
Comparative Toxicogenomics Database CASP9  
Comparative Toxicogenomics Database CAT  
Comparative Toxicogenomics Database CAV1  
Comparative Toxicogenomics Database CAV3  
Comparative Toxicogenomics Database CAVIN2  
Comparative Toxicogenomics Database CBFB  
Comparative Toxicogenomics Database CBL  
Comparative Toxicogenomics Database CBR1  
Comparative Toxicogenomics Database CBR2  
Comparative Toxicogenomics Database CBR3  
Comparative Toxicogenomics Database CBX1  
Comparative Toxicogenomics Database CBX5  
Comparative Toxicogenomics Database CCAR2  
Comparative Toxicogenomics Database CCDC113  
Comparative Toxicogenomics Database CCDC117  
Comparative Toxicogenomics Database CCDC12  
Comparative Toxicogenomics Database CCDC137  
Comparative Toxicogenomics Database CCDC14  
Comparative Toxicogenomics Database CCDC80  
Comparative Toxicogenomics Database CCDC88A  
Comparative Toxicogenomics Database CCDC88B  
Comparative Toxicogenomics Database CCK  
Comparative Toxicogenomics Database CCKAR  
Comparative Toxicogenomics Database CCKBR



|                                     |          |
|-------------------------------------|----------|
| Comparative Toxicogenomics Database | CCL1     |
| Comparative Toxicogenomics Database | CCL11    |
| Comparative Toxicogenomics Database | CCL12    |
| Comparative Toxicogenomics Database | CCL2     |
| Comparative Toxicogenomics Database | CCL20    |
| Comparative Toxicogenomics Database | CCL21    |
| Comparative Toxicogenomics Database | CCL22    |
| Comparative Toxicogenomics Database | CCL26    |
| Comparative Toxicogenomics Database | CCL3     |
| Comparative Toxicogenomics Database | CCL4     |
| Comparative Toxicogenomics Database | CCL5     |
| Comparative Toxicogenomics Database | CCL6     |
| Comparative Toxicogenomics Database | CCL7     |
| Comparative Toxicogenomics Database | CCL8     |
| Comparative Toxicogenomics Database | CCN2     |
| Comparative Toxicogenomics Database | CCN4     |
| Comparative Toxicogenomics Database | CCN5     |
| Comparative Toxicogenomics Database | CCNA1    |
| Comparative Toxicogenomics Database | CCNA2    |
| Comparative Toxicogenomics Database | CCNB1    |
| Comparative Toxicogenomics Database | CCNB2    |
| Comparative Toxicogenomics Database | CCND1    |
| Comparative Toxicogenomics Database | CCND2    |
| Comparative Toxicogenomics Database | CCND3    |
| Comparative Toxicogenomics Database | CCNE1    |
| Comparative Toxicogenomics Database | CCNE2    |
| Comparative Toxicogenomics Database | CCNF     |
| Comparative Toxicogenomics Database | CCNG1    |
| Comparative Toxicogenomics Database | CCNK     |
| Comparative Toxicogenomics Database | CCNL1    |
| Comparative Toxicogenomics Database | CCNT2    |
| Comparative Toxicogenomics Database | CCR1     |
| Comparative Toxicogenomics Database | CCR2     |
| Comparative Toxicogenomics Database | CCR4     |
| Comparative Toxicogenomics Database | CCR5     |
| Comparative Toxicogenomics Database | CCR6     |
| Comparative Toxicogenomics Database | CCR9     |
| Comparative Toxicogenomics Database | CCT2     |
| Comparative Toxicogenomics Database | CCT4     |
| Comparative Toxicogenomics Database | CD14     |
| Comparative Toxicogenomics Database | CD163    |
| Comparative Toxicogenomics Database | CD200R1L |
| Comparative Toxicogenomics Database | CD209    |
| Comparative Toxicogenomics Database | CD24     |
| Comparative Toxicogenomics Database | CD24A    |
| Comparative Toxicogenomics Database | CD28     |
| Comparative Toxicogenomics Database | CD36     |
| Comparative Toxicogenomics Database | CD38     |
| Comparative Toxicogenomics Database | CD3E     |
| Comparative Toxicogenomics Database | CD4      |
| Comparative Toxicogenomics Database | CD40     |
| Comparative Toxicogenomics Database | CD40LG   |
| Comparative Toxicogenomics Database | CD44     |
| Comparative Toxicogenomics Database | CD53     |
| Comparative Toxicogenomics Database | CD5L     |
| Comparative Toxicogenomics Database | CD68     |
| Comparative Toxicogenomics Database | CD69     |
| Comparative Toxicogenomics Database | CD72     |

|                                     |          |
|-------------------------------------|----------|
| Comparative Toxicogenomics Database | CD74     |
| Comparative Toxicogenomics Database | CD80     |
| Comparative Toxicogenomics Database | CD86     |
| Comparative Toxicogenomics Database | CD8A     |
| Comparative Toxicogenomics Database | CDC123   |
| Comparative Toxicogenomics Database | CDC25A   |
| Comparative Toxicogenomics Database | CDC25B   |
| Comparative Toxicogenomics Database | CDC25C   |
| Comparative Toxicogenomics Database | CDC27    |
| Comparative Toxicogenomics Database | CDC34    |
| Comparative Toxicogenomics Database | CDC42    |
| Comparative Toxicogenomics Database | CDC42BPA |
| Comparative Toxicogenomics Database | CDC45L   |
| Comparative Toxicogenomics Database | CDC5L    |
| Comparative Toxicogenomics Database | CDC6     |
| Comparative Toxicogenomics Database | CDC7     |
| Comparative Toxicogenomics Database | CDC73    |
| Comparative Toxicogenomics Database | CDCA2    |
| Comparative Toxicogenomics Database | CDCA3    |
| Comparative Toxicogenomics Database | CDCA4    |
| Comparative Toxicogenomics Database | CDCA5    |
| Comparative Toxicogenomics Database | CDCA7    |
| Comparative Toxicogenomics Database | CDCA7L   |
| Comparative Toxicogenomics Database | CDCA8    |
| Comparative Toxicogenomics Database | CDH1     |
| Comparative Toxicogenomics Database | CDH12    |
| Comparative Toxicogenomics Database | CDH2     |
| Comparative Toxicogenomics Database | CDH23    |
| Comparative Toxicogenomics Database | CDH5     |
| Comparative Toxicogenomics Database | CDK1     |
| Comparative Toxicogenomics Database | CDK12    |
| Comparative Toxicogenomics Database | CDK2     |
| Comparative Toxicogenomics Database | CDK4     |
| Comparative Toxicogenomics Database | CDK5     |
| Comparative Toxicogenomics Database | CDK5R1   |
| Comparative Toxicogenomics Database | CDK5RAP2 |
| Comparative Toxicogenomics Database | CDK5RAP3 |
| Comparative Toxicogenomics Database | CDK6     |
| Comparative Toxicogenomics Database | CDK8     |
| Comparative Toxicogenomics Database | CDKAL1   |
| Comparative Toxicogenomics Database | CDKL5    |
| Comparative Toxicogenomics Database | CDKN1A   |
| Comparative Toxicogenomics Database | CDKN1B   |
| Comparative Toxicogenomics Database | CDKN1C   |
| Comparative Toxicogenomics Database | CDKN2A   |
| Comparative Toxicogenomics Database | CDKN2B   |
| Comparative Toxicogenomics Database | CDKN2C   |
| Comparative Toxicogenomics Database | CDKN3    |
| Comparative Toxicogenomics Database | CDT1     |
| Comparative Toxicogenomics Database | CDV3     |
| Comparative Toxicogenomics Database | CDX1     |
| Comparative Toxicogenomics Database | CEACAM1  |
| Comparative Toxicogenomics Database | CEBPA    |
| Comparative Toxicogenomics Database | CEBPB    |
| Comparative Toxicogenomics Database | CEBPD    |
| Comparative Toxicogenomics Database | CEBPG    |
| Comparative Toxicogenomics Database | CED-3    |
| Comparative Toxicogenomics Database | CED-4    |

|                                     |        |
|-------------------------------------|--------|
| Comparative Toxicogenomics Database | CED-9  |
| Comparative Toxicogenomics Database | CEL    |
| Comparative Toxicogenomics Database | CELSR2 |
| Comparative Toxicogenomics Database | CENPA  |
| Comparative Toxicogenomics Database | CENPE  |
| Comparative Toxicogenomics Database | CENPF  |
| Comparative Toxicogenomics Database | CENPH  |
| Comparative Toxicogenomics Database | CENPL  |
| Comparative Toxicogenomics Database | CENPM  |
| Comparative Toxicogenomics Database | CENPN  |
| Comparative Toxicogenomics Database | CENPO  |
| Comparative Toxicogenomics Database | CENPQ  |
| Comparative Toxicogenomics Database | CENPS  |
| Comparative Toxicogenomics Database | CENPU  |
| Comparative Toxicogenomics Database | CENPW  |
| Comparative Toxicogenomics Database | CEP128 |
| Comparative Toxicogenomics Database | CEP152 |
| Comparative Toxicogenomics Database | CEP55  |
| Comparative Toxicogenomics Database | CEP57  |
| Comparative Toxicogenomics Database | CEP78  |
| Comparative Toxicogenomics Database | CERS1  |
| Comparative Toxicogenomics Database | CERS2  |
| Comparative Toxicogenomics Database | CERS4  |
| Comparative Toxicogenomics Database | CERS6  |
| Comparative Toxicogenomics Database | CES2A  |
| Comparative Toxicogenomics Database | CES2C  |
| Comparative Toxicogenomics Database | CES2H  |
| Comparative Toxicogenomics Database | CES3   |
| Comparative Toxicogenomics Database | CES3B  |
| Comparative Toxicogenomics Database | CFAP36 |
| Comparative Toxicogenomics Database | CFD    |
| Comparative Toxicogenomics Database | CFH    |
| Comparative Toxicogenomics Database | CFL1   |
| Comparative Toxicogenomics Database | CFL2   |
| Comparative Toxicogenomics Database | CFLAR  |
| Comparative Toxicogenomics Database | CFP    |
| Comparative Toxicogenomics Database | CFTR   |
| Comparative Toxicogenomics Database | CGA    |
| Comparative Toxicogenomics Database | CGB3   |
| Comparative Toxicogenomics Database | CHAC2  |
| Comparative Toxicogenomics Database | CHAF1A |
| Comparative Toxicogenomics Database | CHAT   |
| Comparative Toxicogenomics Database | CHCHD2 |
| Comparative Toxicogenomics Database | CHCHD3 |
| Comparative Toxicogenomics Database | CHEK1  |
| Comparative Toxicogenomics Database | CHEK2  |
| Comparative Toxicogenomics Database | CHGA   |
| Comparative Toxicogenomics Database | CHGB   |
| Comparative Toxicogenomics Database | CHI3L1 |
| Comparative Toxicogenomics Database | CHODL  |
| Comparative Toxicogenomics Database | CHP1   |
| Comparative Toxicogenomics Database | CHRM1  |
| Comparative Toxicogenomics Database | CHRM2  |
| Comparative Toxicogenomics Database | CHRM3  |
| Comparative Toxicogenomics Database | CHRNA4 |
| Comparative Toxicogenomics Database | CHRNA5 |
| Comparative Toxicogenomics Database | CHRNB1 |
| Comparative Toxicogenomics Database | CHUK   |

|                                     |         |
|-------------------------------------|---------|
| Comparative Toxicogenomics Database | CIAO2B  |
| Comparative Toxicogenomics Database | CIDEA   |
| Comparative Toxicogenomics Database | CIP2A   |
| Comparative Toxicogenomics Database | CISD2   |
| Comparative Toxicogenomics Database | CIT     |
| Comparative Toxicogenomics Database | CKAP2   |
| Comparative Toxicogenomics Database | CKAP2L  |
| Comparative Toxicogenomics Database | CKAP4   |
| Comparative Toxicogenomics Database | CKS1B   |
| Comparative Toxicogenomics Database | CKS2    |
| Comparative Toxicogenomics Database | CLCA1   |
| Comparative Toxicogenomics Database | CLCF1   |
| Comparative Toxicogenomics Database | CLCN5   |
| Comparative Toxicogenomics Database | CLCN7   |
| Comparative Toxicogenomics Database | CLDN1   |
| Comparative Toxicogenomics Database | CLDN2   |
| Comparative Toxicogenomics Database | CLEC4F  |
| Comparative Toxicogenomics Database | CLEC7A  |
| Comparative Toxicogenomics Database | CLGN    |
| Comparative Toxicogenomics Database | CLIC1   |
| Comparative Toxicogenomics Database | CLIP1   |
| Comparative Toxicogenomics Database | CLK1    |
| Comparative Toxicogenomics Database | CLN3    |
| Comparative Toxicogenomics Database | CLTA    |
| Comparative Toxicogenomics Database | CLU     |
| Comparative Toxicogenomics Database | CLYBL   |
| Comparative Toxicogenomics Database | CMBL    |
| Comparative Toxicogenomics Database | CMC2    |
| Comparative Toxicogenomics Database | CMSS1   |
| Comparative Toxicogenomics Database | CNBP    |
| Comparative Toxicogenomics Database | CNN3    |
| Comparative Toxicogenomics Database | CNOT7   |
| Comparative Toxicogenomics Database | CNST    |
| Comparative Toxicogenomics Database | COBL    |
| Comparative Toxicogenomics Database | COL10A1 |
| Comparative Toxicogenomics Database | COL12A1 |
| Comparative Toxicogenomics Database | COL14A1 |
| Comparative Toxicogenomics Database | COL18A1 |
| Comparative Toxicogenomics Database | COL1A1  |
| Comparative Toxicogenomics Database | COL1A2  |
| Comparative Toxicogenomics Database | COL21A1 |
| Comparative Toxicogenomics Database | COL2A1  |
| Comparative Toxicogenomics Database | COL3A1  |
| Comparative Toxicogenomics Database | COL5A1  |
| Comparative Toxicogenomics Database | COL6A1  |
| Comparative Toxicogenomics Database | COL6A2  |
| Comparative Toxicogenomics Database | COL6A3  |
| Comparative Toxicogenomics Database | COMMD10 |
| Comparative Toxicogenomics Database | COMMD3  |
| Comparative Toxicogenomics Database | COMMD7  |
| Comparative Toxicogenomics Database | COMMD8  |
| Comparative Toxicogenomics Database | COMT    |
| Comparative Toxicogenomics Database | COMTD1  |
| Comparative Toxicogenomics Database | COPS3   |
| Comparative Toxicogenomics Database | COQ2    |
| Comparative Toxicogenomics Database | COQ7    |
| Comparative Toxicogenomics Database | CORO1A  |
| Comparative Toxicogenomics Database | CORO1B  |

|                                     |          |
|-------------------------------------|----------|
| Comparative Toxicogenomics Database | CORO1C   |
| Comparative Toxicogenomics Database | CORO2A   |
| Comparative Toxicogenomics Database | COTL1    |
| Comparative Toxicogenomics Database | COX1     |
| Comparative Toxicogenomics Database | COX11    |
| Comparative Toxicogenomics Database | COX2     |
| Comparative Toxicogenomics Database | COX3     |
| Comparative Toxicogenomics Database | COX411   |
| Comparative Toxicogenomics Database | COX412   |
| Comparative Toxicogenomics Database | COX5A    |
| Comparative Toxicogenomics Database | COX6A1   |
| Comparative Toxicogenomics Database | COX6B1   |
| Comparative Toxicogenomics Database | COX7A1   |
| Comparative Toxicogenomics Database | COX7A2   |
| Comparative Toxicogenomics Database | COX7B    |
| Comparative Toxicogenomics Database | COX8A    |
| Comparative Toxicogenomics Database | CP110    |
| Comparative Toxicogenomics Database | CPB2     |
| Comparative Toxicogenomics Database | CPE      |
| Comparative Toxicogenomics Database | CPEB2    |
| Comparative Toxicogenomics Database | CPO      |
| Comparative Toxicogenomics Database | CPSF1    |
| Comparative Toxicogenomics Database | CPSF6    |
| Comparative Toxicogenomics Database | CPT1A    |
| Comparative Toxicogenomics Database | CPT1B    |
| Comparative Toxicogenomics Database | CRABP2   |
| Comparative Toxicogenomics Database | CREB1    |
| Comparative Toxicogenomics Database | CREB3L2  |
| Comparative Toxicogenomics Database | CREB3L4  |
| Comparative Toxicogenomics Database | CREBBP   |
| Comparative Toxicogenomics Database | CREBZF   |
| Comparative Toxicogenomics Database | CRELD2   |
| Comparative Toxicogenomics Database | CREM     |
| Comparative Toxicogenomics Database | CRIM1    |
| Comparative Toxicogenomics Database | CRIP1    |
| Comparative Toxicogenomics Database | CRIP2    |
| Comparative Toxicogenomics Database | CRISPLD2 |
| Comparative Toxicogenomics Database | CROT     |
| Comparative Toxicogenomics Database | CRP      |
| Comparative Toxicogenomics Database | CRTC2    |
| Comparative Toxicogenomics Database | CRYAB    |
| Comparative Toxicogenomics Database | CRYBA1   |
| Comparative Toxicogenomics Database | CRYZ     |
| Comparative Toxicogenomics Database | CRYZL1   |
| Comparative Toxicogenomics Database | CS       |
| Comparative Toxicogenomics Database | CSE1L    |
| Comparative Toxicogenomics Database | CSF1     |
| Comparative Toxicogenomics Database | CSF1R    |
| Comparative Toxicogenomics Database | CSF2     |
| Comparative Toxicogenomics Database | CSF3     |
| Comparative Toxicogenomics Database | CSNK1G1  |
| Comparative Toxicogenomics Database | CSNK2A2  |
| Comparative Toxicogenomics Database | CSPRS    |
| Comparative Toxicogenomics Database | CSRNP2   |
| Comparative Toxicogenomics Database | CSRNP1   |
| Comparative Toxicogenomics Database | CSRNP3   |
| Comparative Toxicogenomics Database | CST3     |
| Comparative Toxicogenomics Database | CST4     |

Comparative Toxicogenomics Database CSTA  
Comparative Toxicogenomics Database CSTF1  
Comparative Toxicogenomics Database CTCFLOS  
Comparative Toxicogenomics Database CTDSPL2  
Comparative Toxicogenomics Database CTF1  
Comparative Toxicogenomics Database CTGF  
Comparative Toxicogenomics Database CTHRC1  
Comparative Toxicogenomics Database CTNNA1  
Comparative Toxicogenomics Database CTNNAL1  
Comparative Toxicogenomics Database CTNNB1  
Comparative Toxicogenomics Database CTNND1  
Comparative Toxicogenomics Database CTNND2  
Comparative Toxicogenomics Database CTPS  
Comparative Toxicogenomics Database CTR9  
Comparative Toxicogenomics Database CTSD  
Comparative Toxicogenomics Database CTSH  
Comparative Toxicogenomics Database CTSK  
Comparative Toxicogenomics Database CTSS  
Comparative Toxicogenomics Database CTSV  
Comparative Toxicogenomics Database CTTN  
Comparative Toxicogenomics Database :TTNBP2NL  
Comparative Toxicogenomics Database CUL5  
Comparative Toxicogenomics Database CUX1  
Comparative Toxicogenomics Database CX3CL1  
Comparative Toxicogenomics Database CXCL1  
Comparative Toxicogenomics Database CXCL10  
Comparative Toxicogenomics Database CXCL12  
Comparative Toxicogenomics Database CXCL14  
Comparative Toxicogenomics Database CXCL15  
Comparative Toxicogenomics Database CXCL2  
Comparative Toxicogenomics Database CXCL3  
Comparative Toxicogenomics Database CXCL5  
Comparative Toxicogenomics Database CXCL6  
Comparative Toxicogenomics Database CXCL8  
Comparative Toxicogenomics Database CXCL9  
Comparative Toxicogenomics Database CXCR3  
Comparative Toxicogenomics Database CXCR4  
Comparative Toxicogenomics Database CYB561  
Comparative Toxicogenomics Database CYB5A  
Comparative Toxicogenomics Database CYB5R1  
Comparative Toxicogenomics Database CYB5R2  
Comparative Toxicogenomics Database CYB5R3  
Comparative Toxicogenomics Database CYBA  
Comparative Toxicogenomics Database CYBB  
Comparative Toxicogenomics Database CYC1  
Comparative Toxicogenomics Database CYCS  
Comparative Toxicogenomics Database CYGB  
Comparative Toxicogenomics Database CYP11A1  
Comparative Toxicogenomics Database CYP-13A6  
Comparative Toxicogenomics Database CYP17A1  
Comparative Toxicogenomics Database CYP19A1  
Comparative Toxicogenomics Database CYP1A  
Comparative Toxicogenomics Database CYP1A1  
Comparative Toxicogenomics Database CYP1A2  
Comparative Toxicogenomics Database CYP1B1  
Comparative Toxicogenomics Database CYP1C1  
Comparative Toxicogenomics Database CYP1C2  
Comparative Toxicogenomics Database CYP21A2

Comparative Toxicogenomics Database CYP26A1  
Comparative Toxicogenomics Database CYP26B1  
Comparative Toxicogenomics Database CYP27A1  
Comparative Toxicogenomics Database CYP2A12  
Comparative Toxicogenomics Database CYP2A4  
Comparative Toxicogenomics Database CYP2A5  
Comparative Toxicogenomics Database CYP2B1  
Comparative Toxicogenomics Database CYP2B10  
Comparative Toxicogenomics Database CYP2B9  
Comparative Toxicogenomics Database CYP2C1  
Comparative Toxicogenomics Database CYP2C19  
Comparative Toxicogenomics Database CYP2C23  
Comparative Toxicogenomics Database CYP2C29  
Comparative Toxicogenomics Database CYP2C38  
Comparative Toxicogenomics Database CYP2C39  
Comparative Toxicogenomics Database CYP2C8  
Comparative Toxicogenomics Database CYP2C9  
Comparative Toxicogenomics Database CYP2D22  
Comparative Toxicogenomics Database CYP2D6  
Comparative Toxicogenomics Database CYP2D9  
Comparative Toxicogenomics Database CYP2E1  
Comparative Toxicogenomics Database CYP3A11  
Comparative Toxicogenomics Database CYP3A4  
Comparative Toxicogenomics Database CYP4A1  
Comparative Toxicogenomics Database CYP4A10  
Comparative Toxicogenomics Database CYP4A12A  
Comparative Toxicogenomics Database CYP4A14  
Comparative Toxicogenomics Database CYP4A32  
Comparative Toxicogenomics Database CYP4F2  
Comparative Toxicogenomics Database CYP51  
Comparative Toxicogenomics Database CYP7A1  
Comparative Toxicogenomics Database CYP7B1  
Comparative Toxicogenomics Database CYP8B1  
Comparative Toxicogenomics Database CYR1  
Comparative Toxicogenomics Database DACT1  
Comparative Toxicogenomics Database DAG1  
Comparative Toxicogenomics Database DAPK1  
Comparative Toxicogenomics Database DARS  
Comparative Toxicogenomics Database DARS1  
Comparative Toxicogenomics Database DAXX  
Comparative Toxicogenomics Database DBF4  
Comparative Toxicogenomics Database DBN1  
Comparative Toxicogenomics Database DBR1  
Comparative Toxicogenomics Database DBT  
Comparative Toxicogenomics Database DCAF4  
Comparative Toxicogenomics Database DCAKD  
Comparative Toxicogenomics Database DCK  
Comparative Toxicogenomics Database DCLK1  
Comparative Toxicogenomics Database DCLRE1A  
Comparative Toxicogenomics Database DCLRE1B  
Comparative Toxicogenomics Database DCN  
Comparative Toxicogenomics Database DCPS  
Comparative Toxicogenomics Database DCT  
Comparative Toxicogenomics Database DCTN1  
Comparative Toxicogenomics Database DCTN3  
Comparative Toxicogenomics Database DCTN5  
Comparative Toxicogenomics Database DCTN6  
Comparative Toxicogenomics Database DCUN1D5

|                                     |        |
|-------------------------------------|--------|
| Comparative Toxicogenomics Database | DCX    |
| Comparative Toxicogenomics Database | DDAH2  |
| Comparative Toxicogenomics Database | DDB2   |
| Comparative Toxicogenomics Database | DDC    |
| Comparative Toxicogenomics Database | DDIAS  |
| Comparative Toxicogenomics Database | DDIT3  |
| Comparative Toxicogenomics Database | DDIT4  |
| Comparative Toxicogenomics Database | DDOST  |
| Comparative Toxicogenomics Database | DDR2   |
| Comparative Toxicogenomics Database | DDX1   |
| Comparative Toxicogenomics Database | DDX10  |
| Comparative Toxicogenomics Database | DDX17  |
| Comparative Toxicogenomics Database | DDX18  |
| Comparative Toxicogenomics Database | DDX21  |
| Comparative Toxicogenomics Database | DDX23  |
| Comparative Toxicogenomics Database | DDX27  |
| Comparative Toxicogenomics Database | DDX42  |
| Comparative Toxicogenomics Database | DDX49  |
| Comparative Toxicogenomics Database | DDX50  |
| Comparative Toxicogenomics Database | DDX52  |
| Comparative Toxicogenomics Database | DDX54  |
| Comparative Toxicogenomics Database | DDX55  |
| Comparative Toxicogenomics Database | DEFB4A |
| Comparative Toxicogenomics Database | DEK    |
| Comparative Toxicogenomics Database | DEPDC1 |
| Comparative Toxicogenomics Database | DEPDC6 |
| Comparative Toxicogenomics Database | DEPTOR |
| Comparative Toxicogenomics Database | DERA   |
| Comparative Toxicogenomics Database | DERL1  |
| Comparative Toxicogenomics Database | DERL3  |
| Comparative Toxicogenomics Database | DES    |
| Comparative Toxicogenomics Database | DFFA   |
| Comparative Toxicogenomics Database | DGKA   |
| Comparative Toxicogenomics Database | DGUOK  |
| Comparative Toxicogenomics Database | DHCR7  |
| Comparative Toxicogenomics Database | DHFR   |
| Comparative Toxicogenomics Database | DHODH  |
| Comparative Toxicogenomics Database | DHRS1  |
| Comparative Toxicogenomics Database | DHRS2  |
| Comparative Toxicogenomics Database | DHRS3  |
| Comparative Toxicogenomics Database | DHRS4  |
| Comparative Toxicogenomics Database | DHRS7  |
| Comparative Toxicogenomics Database | DHX15  |
| Comparative Toxicogenomics Database | DHX16  |
| Comparative Toxicogenomics Database | DHX38  |
| Comparative Toxicogenomics Database | DHX9   |
| Comparative Toxicogenomics Database | DIABLO |
| Comparative Toxicogenomics Database | DIAPH3 |
| Comparative Toxicogenomics Database | DIO1   |
| Comparative Toxicogenomics Database | DIO2   |
| Comparative Toxicogenomics Database | DKC1   |
| Comparative Toxicogenomics Database | DKK1   |
| Comparative Toxicogenomics Database | DLAT   |
| Comparative Toxicogenomics Database | DLD    |
| Comparative Toxicogenomics Database | DLEU2L |
| Comparative Toxicogenomics Database | DLG1   |
| Comparative Toxicogenomics Database | DLG4   |
| Comparative Toxicogenomics Database | DLGAP5 |



|                                     |         |
|-------------------------------------|---------|
| Comparative Toxicogenomics Database | DLST    |
| Comparative Toxicogenomics Database | DMBT1   |
| Comparative Toxicogenomics Database | DMD     |
| Comparative Toxicogenomics Database | DMKN    |
| Comparative Toxicogenomics Database | DMXL2   |
| Comparative Toxicogenomics Database | DNA2    |
| Comparative Toxicogenomics Database | DNAAF5  |
| Comparative Toxicogenomics Database | DNAJA1  |
| Comparative Toxicogenomics Database | DNAJB1  |
| Comparative Toxicogenomics Database | DNAJB11 |
| Comparative Toxicogenomics Database | DNAJB14 |
| Comparative Toxicogenomics Database | DNAJB4  |
| Comparative Toxicogenomics Database | DNAJB9  |
| Comparative Toxicogenomics Database | DNAJC9  |
| Comparative Toxicogenomics Database | DNASE2  |
| Comparative Toxicogenomics Database | DNM1L   |
| Comparative Toxicogenomics Database | DNM2    |
| Comparative Toxicogenomics Database | DNMT1   |
| Comparative Toxicogenomics Database | DNMT3A  |
| Comparative Toxicogenomics Database | DNMT3B  |
| Comparative Toxicogenomics Database | DOCK8   |
| Comparative Toxicogenomics Database | DOK4    |
| Comparative Toxicogenomics Database | DONSON  |
| Comparative Toxicogenomics Database | DPM1    |
| Comparative Toxicogenomics Database | DPP7    |
| Comparative Toxicogenomics Database | DRAM1   |
| Comparative Toxicogenomics Database | DSC2    |
| Comparative Toxicogenomics Database | DSCC1   |
| Comparative Toxicogenomics Database | DSG1    |
| Comparative Toxicogenomics Database | DSG2    |
| Comparative Toxicogenomics Database | DSN1    |
| Comparative Toxicogenomics Database | DSTN    |
| Comparative Toxicogenomics Database | DTNA    |
| Comparative Toxicogenomics Database | DTR     |
| Comparative Toxicogenomics Database | DTYMK   |
| Comparative Toxicogenomics Database | DUSP1   |
| Comparative Toxicogenomics Database | DUSP10  |
| Comparative Toxicogenomics Database | DUSP3   |
| Comparative Toxicogenomics Database | DUSP8   |
| Comparative Toxicogenomics Database | DUT     |
| Comparative Toxicogenomics Database | DYNC2H1 |
| Comparative Toxicogenomics Database | DYNLL1  |
| Comparative Toxicogenomics Database | DYNLT3  |
| Comparative Toxicogenomics Database | DYRK1A  |
| Comparative Toxicogenomics Database | E2F1    |
| Comparative Toxicogenomics Database | E2F2    |
| Comparative Toxicogenomics Database | E2F3    |
| Comparative Toxicogenomics Database | E2F7    |
| Comparative Toxicogenomics Database | E2F8    |
| Comparative Toxicogenomics Database | E4F1    |
| Comparative Toxicogenomics Database | EBP     |
| Comparative Toxicogenomics Database | ECE1    |
| Comparative Toxicogenomics Database | ECH1    |
| Comparative Toxicogenomics Database | ECI1    |
| Comparative Toxicogenomics Database | ECI2    |
| Comparative Toxicogenomics Database | ECM1    |
| Comparative Toxicogenomics Database | ECT2    |
| Comparative Toxicogenomics Database | EDARADD |

|                                     |          |
|-------------------------------------|----------|
| Comparative Toxicogenomics Database | EDC4     |
| Comparative Toxicogenomics Database | EDN1     |
| Comparative Toxicogenomics Database | EDN2     |
| Comparative Toxicogenomics Database | EDRF1    |
| Comparative Toxicogenomics Database | EED      |
| Comparative Toxicogenomics Database | EEF1A1   |
| Comparative Toxicogenomics Database | EEF1A2   |
| Comparative Toxicogenomics Database | EEF1E1   |
| Comparative Toxicogenomics Database | EEF2     |
| Comparative Toxicogenomics Database | EEF2K    |
| Comparative Toxicogenomics Database | EFEMP1   |
| Comparative Toxicogenomics Database | EFHD1    |
| Comparative Toxicogenomics Database | EFNA1    |
| Comparative Toxicogenomics Database | EFNB2    |
| Comparative Toxicogenomics Database | EFTUD2   |
| Comparative Toxicogenomics Database | EGF      |
| Comparative Toxicogenomics Database | EGFR     |
| Comparative Toxicogenomics Database | EGL-1    |
| Comparative Toxicogenomics Database | EGLN1    |
| Comparative Toxicogenomics Database | EGR      |
| Comparative Toxicogenomics Database | EGR1     |
| Comparative Toxicogenomics Database | EGR3     |
| Comparative Toxicogenomics Database | EHBP1L1  |
| Comparative Toxicogenomics Database | EI24     |
| Comparative Toxicogenomics Database | EIF1     |
| Comparative Toxicogenomics Database | EIF2AK2  |
| Comparative Toxicogenomics Database | EIF2AK3  |
| Comparative Toxicogenomics Database | EIF2B4   |
| Comparative Toxicogenomics Database | EIF2S1   |
| Comparative Toxicogenomics Database | EIF3L    |
| Comparative Toxicogenomics Database | EIF4A1   |
| Comparative Toxicogenomics Database | EIF4A2   |
| Comparative Toxicogenomics Database | EIF4B    |
| Comparative Toxicogenomics Database | EIF4E    |
| Comparative Toxicogenomics Database | EIF4EBP1 |
| Comparative Toxicogenomics Database | EIF4G1   |
| Comparative Toxicogenomics Database | EIF4G2   |
| Comparative Toxicogenomics Database | EIF5     |
| Comparative Toxicogenomics Database | EIF5A    |
| Comparative Toxicogenomics Database | EIF6     |
| Comparative Toxicogenomics Database | ELAPOR1  |
| Comparative Toxicogenomics Database | ELAVL1   |
| Comparative Toxicogenomics Database | ELK1     |
| Comparative Toxicogenomics Database | ELOA     |
| Comparative Toxicogenomics Database | ELOVL1   |
| Comparative Toxicogenomics Database | ELOVL2   |
| Comparative Toxicogenomics Database | ELOVL3   |
| Comparative Toxicogenomics Database | ELOVL4   |
| Comparative Toxicogenomics Database | ELOVL5   |
| Comparative Toxicogenomics Database | ELOVL6   |
| Comparative Toxicogenomics Database | ELOVL7   |
| Comparative Toxicogenomics Database | ELP5     |
| Comparative Toxicogenomics Database | EMC2     |
| Comparative Toxicogenomics Database | EMC8     |
| Comparative Toxicogenomics Database | EMC9     |
| Comparative Toxicogenomics Database | EN1      |
| Comparative Toxicogenomics Database | ENC1     |
| Comparative Toxicogenomics Database | ENDOD1   |

|                                     |         |
|-------------------------------------|---------|
| Comparative Toxicogenomics Database | ENDOG   |
| Comparative Toxicogenomics Database | ENO1    |
| Comparative Toxicogenomics Database | ENO2    |
| Comparative Toxicogenomics Database | ENO3    |
| Comparative Toxicogenomics Database | ENPEP   |
| Comparative Toxicogenomics Database | ENPP1   |
| Comparative Toxicogenomics Database | ENPP2   |
| Comparative Toxicogenomics Database | ENPP4   |
| Comparative Toxicogenomics Database | ENTPD1  |
| Comparative Toxicogenomics Database | EP300   |
| Comparative Toxicogenomics Database | EPB41L2 |
| Comparative Toxicogenomics Database | EPB41L3 |
| Comparative Toxicogenomics Database | EPB41L5 |
| Comparative Toxicogenomics Database | EPCAM   |
| Comparative Toxicogenomics Database | EPHA1   |
| Comparative Toxicogenomics Database | EPHA4   |
| Comparative Toxicogenomics Database | EPHX1   |
| Comparative Toxicogenomics Database | EPHX2   |
| Comparative Toxicogenomics Database | EPO     |
| Comparative Toxicogenomics Database | EPOR    |
| Comparative Toxicogenomics Database | EPS15   |
| Comparative Toxicogenomics Database | EPS8    |
| Comparative Toxicogenomics Database | ERBB2   |
| Comparative Toxicogenomics Database | ERBB3   |
| Comparative Toxicogenomics Database | ERBB4   |
| Comparative Toxicogenomics Database | ERC2    |
| Comparative Toxicogenomics Database | ERCC1   |
| Comparative Toxicogenomics Database | ERCC3   |
| Comparative Toxicogenomics Database | ERCC6   |
| Comparative Toxicogenomics Database | ERCC6L  |
| Comparative Toxicogenomics Database | ERLIN2  |
| Comparative Toxicogenomics Database | ERMP1   |
| Comparative Toxicogenomics Database | ERN1    |
| Comparative Toxicogenomics Database | ERO1A   |
| Comparative Toxicogenomics Database | ERRF11  |
| Comparative Toxicogenomics Database | ES1     |
| Comparative Toxicogenomics Database | ESPL1   |
| Comparative Toxicogenomics Database | ESPN    |
| Comparative Toxicogenomics Database | ESR1    |
| Comparative Toxicogenomics Database | ESR2    |
| Comparative Toxicogenomics Database | ESRRA   |
| Comparative Toxicogenomics Database | ETFA    |
| Comparative Toxicogenomics Database | ETFB    |
| Comparative Toxicogenomics Database | ETHE1   |
| Comparative Toxicogenomics Database | ETNK2   |
| Comparative Toxicogenomics Database | ETS1    |
| Comparative Toxicogenomics Database | ETV4    |
| Comparative Toxicogenomics Database | ETV5    |
| Comparative Toxicogenomics Database | EWSR1   |
| Comparative Toxicogenomics Database | EXO1    |
| Comparative Toxicogenomics Database | EXOSC1  |
| Comparative Toxicogenomics Database | EXOSC10 |
| Comparative Toxicogenomics Database | EXOSC2  |
| Comparative Toxicogenomics Database | EXOSC6  |
| Comparative Toxicogenomics Database | EXOSC7  |
| Comparative Toxicogenomics Database | EYA3    |
| Comparative Toxicogenomics Database | EZH1    |
| Comparative Toxicogenomics Database | EZH2    |

|                                     |          |
|-------------------------------------|----------|
| Comparative Toxicogenomics Database | F13A1    |
| Comparative Toxicogenomics Database | F2       |
| Comparative Toxicogenomics Database | F2R      |
| Comparative Toxicogenomics Database | F3       |
| Comparative Toxicogenomics Database | F8       |
| Comparative Toxicogenomics Database | FABP3    |
| Comparative Toxicogenomics Database | FABP4    |
| Comparative Toxicogenomics Database | FABP6    |
| Comparative Toxicogenomics Database | FABP7    |
| Comparative Toxicogenomics Database | FADD     |
| Comparative Toxicogenomics Database | FADS1    |
| Comparative Toxicogenomics Database | FAH      |
| Comparative Toxicogenomics Database | FAIM     |
| Comparative Toxicogenomics Database | FAM107A  |
| Comparative Toxicogenomics Database | FAM107B  |
| Comparative Toxicogenomics Database | FAM110B  |
| Comparative Toxicogenomics Database | FAM110C  |
| Comparative Toxicogenomics Database | FAM111A  |
| Comparative Toxicogenomics Database | FAM111B  |
| Comparative Toxicogenomics Database | FAM135A  |
| Comparative Toxicogenomics Database | FAM13A   |
| Comparative Toxicogenomics Database | FAM149B1 |
| Comparative Toxicogenomics Database | FAM161B  |
| Comparative Toxicogenomics Database | FAM171B  |
| Comparative Toxicogenomics Database | FAM214A  |
| Comparative Toxicogenomics Database | FAM222B  |
| Comparative Toxicogenomics Database | FAM43A   |
| Comparative Toxicogenomics Database | FAM72A   |
| Comparative Toxicogenomics Database | FANCA    |
| Comparative Toxicogenomics Database | FANCD2   |
| Comparative Toxicogenomics Database | FANCG    |
| Comparative Toxicogenomics Database | FANCI    |
| Comparative Toxicogenomics Database | FANCL    |
| Comparative Toxicogenomics Database | FAR1     |
| Comparative Toxicogenomics Database | FAS      |
| Comparative Toxicogenomics Database | FASL     |
| Comparative Toxicogenomics Database | FASLG    |
| Comparative Toxicogenomics Database | FASN     |
| Comparative Toxicogenomics Database | FBLN5    |
| Comparative Toxicogenomics Database | FBN1     |
| Comparative Toxicogenomics Database | FBP1     |
| Comparative Toxicogenomics Database | FBXO11   |
| Comparative Toxicogenomics Database | FBXO3    |
| Comparative Toxicogenomics Database | FBXO32   |
| Comparative Toxicogenomics Database | FBXO5    |
| Comparative Toxicogenomics Database | FCER1A   |
| Comparative Toxicogenomics Database | FCER1G   |
| Comparative Toxicogenomics Database | FCHO2    |
| Comparative Toxicogenomics Database | FCNA     |
| Comparative Toxicogenomics Database | FDFT1    |
| Comparative Toxicogenomics Database | FDPS     |
| Comparative Toxicogenomics Database | FDX1     |
| Comparative Toxicogenomics Database | FDXR     |
| Comparative Toxicogenomics Database | FEN1     |
| Comparative Toxicogenomics Database | FES      |
| Comparative Toxicogenomics Database | FGD4     |
| Comparative Toxicogenomics Database | FGF1     |
| Comparative Toxicogenomics Database | FGF10    |

|                                     |         |
|-------------------------------------|---------|
| Comparative Toxicogenomics Database | FGF2    |
| Comparative Toxicogenomics Database | FGF21   |
| Comparative Toxicogenomics Database | FGF4    |
| Comparative Toxicogenomics Database | FGF7    |
| Comparative Toxicogenomics Database | FGF8    |
| Comparative Toxicogenomics Database | FGFR1   |
| Comparative Toxicogenomics Database | FGFR3   |
| Comparative Toxicogenomics Database | FGL1    |
| Comparative Toxicogenomics Database | FGR     |
| Comparative Toxicogenomics Database | FHL2    |
| Comparative Toxicogenomics Database | FICD    |
| Comparative Toxicogenomics Database | FIGNL1  |
| Comparative Toxicogenomics Database | FIS1    |
| Comparative Toxicogenomics Database | FITM2   |
| Comparative Toxicogenomics Database | FKBP11  |
| Comparative Toxicogenomics Database | FKBP3   |
| Comparative Toxicogenomics Database | FKBP4   |
| Comparative Toxicogenomics Database | FKBP5   |
| Comparative Toxicogenomics Database | FLOT1   |
| Comparative Toxicogenomics Database | FLT1    |
| Comparative Toxicogenomics Database | FLT3LG  |
| Comparative Toxicogenomics Database | FMNL2   |
| Comparative Toxicogenomics Database | FMO1    |
| Comparative Toxicogenomics Database | FMO4    |
| Comparative Toxicogenomics Database | FMR1    |
| Comparative Toxicogenomics Database | FN1     |
| Comparative Toxicogenomics Database | FNDC3B  |
| Comparative Toxicogenomics Database | FOS     |
| Comparative Toxicogenomics Database | FOXA1   |
| Comparative Toxicogenomics Database | FOXA2   |
| Comparative Toxicogenomics Database | FOXA3   |
| Comparative Toxicogenomics Database | FOXC2   |
| Comparative Toxicogenomics Database | FOXD1   |
| Comparative Toxicogenomics Database | FOXE1   |
| Comparative Toxicogenomics Database | FOXO1   |
| Comparative Toxicogenomics Database | FOXO3   |
| Comparative Toxicogenomics Database | FOXO3A  |
| Comparative Toxicogenomics Database | FOXO4   |
| Comparative Toxicogenomics Database | FOXP3   |
| Comparative Toxicogenomics Database | FOXRED1 |
| Comparative Toxicogenomics Database | FOXRED2 |
| Comparative Toxicogenomics Database | FRMD6   |
| Comparative Toxicogenomics Database | FSHB    |
| Comparative Toxicogenomics Database | FST     |
| Comparative Toxicogenomics Database | FSTL1   |
| Comparative Toxicogenomics Database | FTCD    |
| Comparative Toxicogenomics Database | FTH1    |
| Comparative Toxicogenomics Database | FUCA1   |
| Comparative Toxicogenomics Database | FXN     |
| Comparative Toxicogenomics Database | FXYD2   |
| Comparative Toxicogenomics Database | FYB2    |
| Comparative Toxicogenomics Database | FYN     |
| Comparative Toxicogenomics Database | FYTTD1  |
| Comparative Toxicogenomics Database | FZD2    |
| Comparative Toxicogenomics Database | G0S2    |
| Comparative Toxicogenomics Database | G2E3    |

|                                     |         |
|-------------------------------------|---------|
| Comparative Toxicogenomics Database | G3BP1   |
| Comparative Toxicogenomics Database | G6PC    |
| Comparative Toxicogenomics Database | G6PC3   |
| Comparative Toxicogenomics Database | G6PD    |
| Comparative Toxicogenomics Database | GAB1    |
| Comparative Toxicogenomics Database | GABARAP |
| Comparative Toxicogenomics Database | GABPA   |
| Comparative Toxicogenomics Database | GADD45A |
| Comparative Toxicogenomics Database | GADD45B |
| Comparative Toxicogenomics Database | GADD45G |
| Comparative Toxicogenomics Database | GALNT10 |
| Comparative Toxicogenomics Database | GALNT4  |
| Comparative Toxicogenomics Database | GALNT7  |
| Comparative Toxicogenomics Database | GAP43   |
| Comparative Toxicogenomics Database | GAPDH   |
| Comparative Toxicogenomics Database | GAPVD1  |
| Comparative Toxicogenomics Database | GAS1    |
| Comparative Toxicogenomics Database | GAS-1   |
| Comparative Toxicogenomics Database | GAS2L3  |
| Comparative Toxicogenomics Database | GAS6    |
| Comparative Toxicogenomics Database | GAST    |
| Comparative Toxicogenomics Database | GATA3   |
| Comparative Toxicogenomics Database | GATM    |
| Comparative Toxicogenomics Database | GBA     |
| Comparative Toxicogenomics Database | GCAT    |
| Comparative Toxicogenomics Database | GCH1    |
| Comparative Toxicogenomics Database | GCHFR   |
| Comparative Toxicogenomics Database | GCK     |
| Comparative Toxicogenomics Database | GCLC    |
| Comparative Toxicogenomics Database | GCLM    |
| Comparative Toxicogenomics Database | GDF1    |
| Comparative Toxicogenomics Database | GDF15   |
| Comparative Toxicogenomics Database | GDNF    |
| Comparative Toxicogenomics Database | GDPD3   |
| Comparative Toxicogenomics Database | GDPD5   |
| Comparative Toxicogenomics Database | GEMIN7  |
| Comparative Toxicogenomics Database | GFAP    |
| Comparative Toxicogenomics Database | GFPT2   |
| Comparative Toxicogenomics Database | GFRA1   |
| Comparative Toxicogenomics Database | GFRA2   |
| Comparative Toxicogenomics Database | GGH     |
| Comparative Toxicogenomics Database | GGNBP2  |
| Comparative Toxicogenomics Database | GGT1    |
| Comparative Toxicogenomics Database | GH1     |
| Comparative Toxicogenomics Database | GHITM   |
| Comparative Toxicogenomics Database | GHR     |
| Comparative Toxicogenomics Database | GHRH    |
| Comparative Toxicogenomics Database | GINS1   |
| Comparative Toxicogenomics Database | GINS2   |
| Comparative Toxicogenomics Database | GINS3   |
| Comparative Toxicogenomics Database | GIT2    |
| Comparative Toxicogenomics Database | GJA1    |
| Comparative Toxicogenomics Database | GJA10   |
| Comparative Toxicogenomics Database | GJA4    |
| Comparative Toxicogenomics Database | GJB2    |
| Comparative Toxicogenomics Database | GLA     |
| Comparative Toxicogenomics Database | GLB1    |
| Comparative Toxicogenomics Database | GLI1    |

|                                     |         |
|-------------------------------------|---------|
| Comparative Toxicogenomics Database | GLIPR2  |
| Comparative Toxicogenomics Database | GLMP    |
| Comparative Toxicogenomics Database | GLO1    |
| Comparative Toxicogenomics Database | GLOD5   |
| Comparative Toxicogenomics Database | GLRX2   |
| Comparative Toxicogenomics Database | GLRX5   |
| Comparative Toxicogenomics Database | GLS     |
| Comparative Toxicogenomics Database | GLS2    |
| Comparative Toxicogenomics Database | GLUL    |
| Comparative Toxicogenomics Database | GMNN    |
| Comparative Toxicogenomics Database | GMPPB   |
| Comparative Toxicogenomics Database | GNAS    |
| Comparative Toxicogenomics Database | GNB1    |
| Comparative Toxicogenomics Database | GNGT2   |
| Comparative Toxicogenomics Database | GNL2    |
| Comparative Toxicogenomics Database | GNPNAT1 |
| Comparative Toxicogenomics Database | GOLIM4  |
| Comparative Toxicogenomics Database | GOT1    |
| Comparative Toxicogenomics Database | GP1BB   |
| Comparative Toxicogenomics Database | GPAA1   |
| Comparative Toxicogenomics Database | GPAM    |
| Comparative Toxicogenomics Database | GPAT4   |
| Comparative Toxicogenomics Database | GPC1    |
| Comparative Toxicogenomics Database | GPC6    |
| Comparative Toxicogenomics Database | GPD1    |
| Comparative Toxicogenomics Database | GPD1L   |
| Comparative Toxicogenomics Database | GPD2    |
| Comparative Toxicogenomics Database | GPER1   |
| Comparative Toxicogenomics Database | GPLD1   |
| Comparative Toxicogenomics Database | GPM6B   |
| Comparative Toxicogenomics Database | GPR142  |
| Comparative Toxicogenomics Database | GPR89   |
| Comparative Toxicogenomics Database | GPRC5A  |
| Comparative Toxicogenomics Database | GPRIN1  |
| Comparative Toxicogenomics Database | GPSM2   |
| Comparative Toxicogenomics Database | GPT     |
| Comparative Toxicogenomics Database | GPX1    |
| Comparative Toxicogenomics Database | GPX2    |
| Comparative Toxicogenomics Database | GPX3    |
| Comparative Toxicogenomics Database | GPX4    |
| Comparative Toxicogenomics Database | GPX8    |
| Comparative Toxicogenomics Database | GRAMD1A |
| Comparative Toxicogenomics Database | GRB10   |
| Comparative Toxicogenomics Database | GRB2    |
| Comparative Toxicogenomics Database | GREB1   |
| Comparative Toxicogenomics Database | GRHL3   |
| Comparative Toxicogenomics Database | GRIA1   |
| Comparative Toxicogenomics Database | GRIN1   |
| Comparative Toxicogenomics Database | GRIN2B  |
| Comparative Toxicogenomics Database | GRINA   |
| Comparative Toxicogenomics Database | GRN     |
| Comparative Toxicogenomics Database | GRPEL2  |
| Comparative Toxicogenomics Database | GSK3A   |
| Comparative Toxicogenomics Database | GSK3B   |
| Comparative Toxicogenomics Database | GSN     |
| Comparative Toxicogenomics Database | GSPT1   |
| Comparative Toxicogenomics Database | GSR     |
| Comparative Toxicogenomics Database | GSTA1   |

|                                     |          |
|-------------------------------------|----------|
| Comparative Toxicogenomics Database | GSTA2    |
| Comparative Toxicogenomics Database | GSTA3    |
| Comparative Toxicogenomics Database | GSTA4    |
| Comparative Toxicogenomics Database | GSTA5    |
| Comparative Toxicogenomics Database | GSTD1    |
| Comparative Toxicogenomics Database | GSTK1    |
| Comparative Toxicogenomics Database | GSTM1    |
| Comparative Toxicogenomics Database | GSTM3    |
| Comparative Toxicogenomics Database | GSTO1    |
| Comparative Toxicogenomics Database | GSTP1    |
| Comparative Toxicogenomics Database | GSTP3    |
| Comparative Toxicogenomics Database | GSTZ1    |
| Comparative Toxicogenomics Database | GTF2B    |
| Comparative Toxicogenomics Database | GTF2E2   |
| Comparative Toxicogenomics Database | GTF2H4   |
| Comparative Toxicogenomics Database | GTF3A    |
| Comparative Toxicogenomics Database | GTF3C3   |
| Comparative Toxicogenomics Database | GTSE1    |
| Comparative Toxicogenomics Database | GUSB     |
| Comparative Toxicogenomics Database | GYP A    |
| Comparative Toxicogenomics Database | GYS1     |
| Comparative Toxicogenomics Database | GYS2     |
| Comparative Toxicogenomics Database | GZMB     |
| Comparative Toxicogenomics Database | GZMH     |
| Comparative Toxicogenomics Database | H13      |
| Comparative Toxicogenomics Database | H19      |
| Comparative Toxicogenomics Database | H2AC6    |
| Comparative Toxicogenomics Database | H2AX     |
| Comparative Toxicogenomics Database | H2AZ1    |
| Comparative Toxicogenomics Database | H2BC21   |
| Comparative Toxicogenomics Database | H2BC5    |
| Comparative Toxicogenomics Database | H2BC6    |
| Comparative Toxicogenomics Database | H2BC8    |
| Comparative Toxicogenomics Database | H2-D1    |
| Comparative Toxicogenomics Database | H2-K1    |
| Comparative Toxicogenomics Database | H2-M10.1 |
| Comparative Toxicogenomics Database | H2-T23   |
| Comparative Toxicogenomics Database | H3C10    |
| Comparative Toxicogenomics Database | H3C12    |
| Comparative Toxicogenomics Database | H3C13    |
| Comparative Toxicogenomics Database | H3C4     |
| Comparative Toxicogenomics Database | H3F3B    |
| Comparative Toxicogenomics Database | H4C6     |
| Comparative Toxicogenomics Database | HACD2    |
| Comparative Toxicogenomics Database | HADH     |
| Comparative Toxicogenomics Database | HADHB    |
| Comparative Toxicogenomics Database | HAMP     |
| Comparative Toxicogenomics Database | HAO2     |
| Comparative Toxicogenomics Database | HAS1     |
| Comparative Toxicogenomics Database | HASPIN   |
| Comparative Toxicogenomics Database | HAUS1    |
| Comparative Toxicogenomics Database | HAUS8    |
| Comparative Toxicogenomics Database | HAVCR1   |
| Comparative Toxicogenomics Database | HAVCR2   |
| Comparative Toxicogenomics Database | HAX1     |
| Comparative Toxicogenomics Database | HBA1     |
| Comparative Toxicogenomics Database | HBA-A1   |
| Comparative Toxicogenomics Database | HBB      |



|                                     |          |
|-------------------------------------|----------|
| Comparative Toxicogenomics Database | HBB-BS   |
| Comparative Toxicogenomics Database | HBG2     |
| Comparative Toxicogenomics Database | HC       |
| Comparative Toxicogenomics Database | HCCS     |
| Comparative Toxicogenomics Database | HCK      |
| Comparative Toxicogenomics Database | HDAC1    |
| Comparative Toxicogenomics Database | HDAC2    |
| Comparative Toxicogenomics Database | HDAC3    |
| Comparative Toxicogenomics Database | HDAC5    |
| Comparative Toxicogenomics Database | HDAC9    |
| Comparative Toxicogenomics Database | HDGF     |
| Comparative Toxicogenomics Database | HDGFL2   |
| Comparative Toxicogenomics Database | HELLS    |
| Comparative Toxicogenomics Database | HERPUD1  |
| Comparative Toxicogenomics Database | HES1     |
| Comparative Toxicogenomics Database | HEXB     |
| Comparative Toxicogenomics Database | HGF      |
| Comparative Toxicogenomics Database | HHIP     |
| Comparative Toxicogenomics Database | HIBADH   |
| Comparative Toxicogenomics Database | HIF1A    |
| Comparative Toxicogenomics Database | HINT2    |
| Comparative Toxicogenomics Database | HIPK1    |
| Comparative Toxicogenomics Database | HIPK2    |
| Comparative Toxicogenomics Database | HIRIP3   |
| Comparative Toxicogenomics Database | HIVEP1   |
| Comparative Toxicogenomics Database | HJURP    |
| Comparative Toxicogenomics Database | HK1      |
| Comparative Toxicogenomics Database | HK2      |
| Comparative Toxicogenomics Database | HLA-A    |
| Comparative Toxicogenomics Database | HLA-B    |
| Comparative Toxicogenomics Database | HLA-F    |
| Comparative Toxicogenomics Database | HLCS     |
| Comparative Toxicogenomics Database | HMGA2    |
| Comparative Toxicogenomics Database | HMGB1    |
| Comparative Toxicogenomics Database | HMGB2    |
| Comparative Toxicogenomics Database | HMGCR    |
| Comparative Toxicogenomics Database | HMGCS1   |
| Comparative Toxicogenomics Database | HMGCS2   |
| Comparative Toxicogenomics Database | HMGN2    |
| Comparative Toxicogenomics Database | HMMR     |
| Comparative Toxicogenomics Database | HMOX1    |
| Comparative Toxicogenomics Database | HNF1A    |
| Comparative Toxicogenomics Database | HNF1B    |
| Comparative Toxicogenomics Database | HNF4A    |
| Comparative Toxicogenomics Database | HNRNPA1  |
| Comparative Toxicogenomics Database | NRNPA2B1 |
| Comparative Toxicogenomics Database | HNRNPA3  |
| Comparative Toxicogenomics Database | HNRNPAB  |
| Comparative Toxicogenomics Database | HNRNPD   |
| Comparative Toxicogenomics Database | HNRNPDL  |
| Comparative Toxicogenomics Database | HNRNPH2  |
| Comparative Toxicogenomics Database | HNRNPK   |
| Comparative Toxicogenomics Database | HNRNPLL  |
| Comparative Toxicogenomics Database | HNRNPR   |
| Comparative Toxicogenomics Database | HNRNPUL2 |
| Comparative Toxicogenomics Database | HOMER2   |
| Comparative Toxicogenomics Database | HOPX     |
| Comparative Toxicogenomics Database | HOXA1    |

|                                     |          |
|-------------------------------------|----------|
| Comparative Toxicogenomics Database | HOXB9    |
| Comparative Toxicogenomics Database | HOXC6    |
| Comparative Toxicogenomics Database | HP       |
| Comparative Toxicogenomics Database | HPGD     |
| Comparative Toxicogenomics Database | HPRT1    |
| Comparative Toxicogenomics Database | HPX      |
| Comparative Toxicogenomics Database | HR       |
| Comparative Toxicogenomics Database | HRAS     |
| Comparative Toxicogenomics Database | HRG      |
| Comparative Toxicogenomics Database | HS1BP3   |
| Comparative Toxicogenomics Database | HSD11B1  |
| Comparative Toxicogenomics Database | HSD17B12 |
| Comparative Toxicogenomics Database | HSD17B2  |
| Comparative Toxicogenomics Database | HSD17B4  |
| Comparative Toxicogenomics Database | HSD17B7  |
| Comparative Toxicogenomics Database | HSD3B1   |
| Comparative Toxicogenomics Database | HSD3B4   |
| Comparative Toxicogenomics Database | HSD3B5   |
| Comparative Toxicogenomics Database | HSF1     |
| Comparative Toxicogenomics Database | HSP-16.1 |
| Comparative Toxicogenomics Database | HSP27    |
| Comparative Toxicogenomics Database | HSP68    |
| Comparative Toxicogenomics Database | HSP90AA1 |
| Comparative Toxicogenomics Database | HSP90AB1 |
| Comparative Toxicogenomics Database | HSP90B1  |
| Comparative Toxicogenomics Database | HSPA1A   |
| Comparative Toxicogenomics Database | HSPA1B   |
| Comparative Toxicogenomics Database | HSPA2    |
| Comparative Toxicogenomics Database | HSPA4L   |
| Comparative Toxicogenomics Database | HSPA5    |
| Comparative Toxicogenomics Database | HSPA9    |
| Comparative Toxicogenomics Database | HSPB1    |
| Comparative Toxicogenomics Database | HSPB8    |
| Comparative Toxicogenomics Database | HSPD1    |
| Comparative Toxicogenomics Database | HSPE1    |
| Comparative Toxicogenomics Database | HTRA2    |
| Comparative Toxicogenomics Database | HYKK     |
| Comparative Toxicogenomics Database | HYLS1    |
| Comparative Toxicogenomics Database | HYOU1    |
| Comparative Toxicogenomics Database | ICAM1    |
| Comparative Toxicogenomics Database | ID1      |
| Comparative Toxicogenomics Database | ID3      |
| Comparative Toxicogenomics Database | ID4      |
| Comparative Toxicogenomics Database | IDE      |
| Comparative Toxicogenomics Database | IDH2     |
| Comparative Toxicogenomics Database | IDH3A    |
| Comparative Toxicogenomics Database | IDH3B    |
| Comparative Toxicogenomics Database | IDI1     |
| Comparative Toxicogenomics Database | IDO1     |
| Comparative Toxicogenomics Database | IDS      |
| Comparative Toxicogenomics Database | IER2     |
| Comparative Toxicogenomics Database | IER3     |
| Comparative Toxicogenomics Database | IFI30    |
| Comparative Toxicogenomics Database | IFI6     |
| Comparative Toxicogenomics Database | IFIT3    |
| Comparative Toxicogenomics Database | IFITM1   |
| Comparative Toxicogenomics Database | IFITM3   |
| Comparative Toxicogenomics Database | IFNA     |

|                                     |         |
|-------------------------------------|---------|
| Comparative Toxicogenomics Database | IFNA1   |
| Comparative Toxicogenomics Database | IFNB1   |
| Comparative Toxicogenomics Database | IFNG    |
| Comparative Toxicogenomics Database | IFRD1   |
| Comparative Toxicogenomics Database | IFRD2   |
| Comparative Toxicogenomics Database | IFT122  |
| Comparative Toxicogenomics Database | IFT22   |
| Comparative Toxicogenomics Database | IFT27   |
| Comparative Toxicogenomics Database | IFT43   |
| Comparative Toxicogenomics Database | IGF1    |
| Comparative Toxicogenomics Database | IGF1R   |
| Comparative Toxicogenomics Database | IGF2    |
| Comparative Toxicogenomics Database | IGF2BP2 |
| Comparative Toxicogenomics Database | IGF2BP3 |
| Comparative Toxicogenomics Database | IGF2R   |
| Comparative Toxicogenomics Database | IGFBP1  |
| Comparative Toxicogenomics Database | IGFBP2  |
| Comparative Toxicogenomics Database | IGFBP3  |
| Comparative Toxicogenomics Database | IGFBP4  |
| Comparative Toxicogenomics Database | IGFBP5  |
| Comparative Toxicogenomics Database | IGSF6   |
| Comparative Toxicogenomics Database | IHH     |
| Comparative Toxicogenomics Database | IK      |
| Comparative Toxicogenomics Database | IKBKB   |
| Comparative Toxicogenomics Database | IKBKG   |
| Comparative Toxicogenomics Database | IL10    |
| Comparative Toxicogenomics Database | IL12A   |
| Comparative Toxicogenomics Database | IL12B   |
| Comparative Toxicogenomics Database | IL13    |
| Comparative Toxicogenomics Database | IL17A   |
| Comparative Toxicogenomics Database | IL17C   |
| Comparative Toxicogenomics Database | IL17RB  |
| Comparative Toxicogenomics Database | IL18    |
| Comparative Toxicogenomics Database | IL18BP  |
| Comparative Toxicogenomics Database | IL19    |
| Comparative Toxicogenomics Database | IL1A    |
| Comparative Toxicogenomics Database | IL1B    |
| Comparative Toxicogenomics Database | IL1R1   |
| Comparative Toxicogenomics Database | IL1RN   |
| Comparative Toxicogenomics Database | IL2     |
| Comparative Toxicogenomics Database | IL20    |
| Comparative Toxicogenomics Database | IL24    |
| Comparative Toxicogenomics Database | IL27    |
| Comparative Toxicogenomics Database | IL2RA   |
| Comparative Toxicogenomics Database | IL3     |
| Comparative Toxicogenomics Database | IL4     |
| Comparative Toxicogenomics Database | IL5     |
| Comparative Toxicogenomics Database | IL6     |
| Comparative Toxicogenomics Database | IL6ST   |
| Comparative Toxicogenomics Database | IL7R    |
| Comparative Toxicogenomics Database | IL9     |
| Comparative Toxicogenomics Database | ILDR2   |
| Comparative Toxicogenomics Database | ILF2    |
| Comparative Toxicogenomics Database | ILF3    |
| Comparative Toxicogenomics Database | ILP3    |
| Comparative Toxicogenomics Database | ILP5    |
| Comparative Toxicogenomics Database | ILVBL   |
| Comparative Toxicogenomics Database | IMMP1L  |

|                                     |          |
|-------------------------------------|----------|
| Comparative Toxicogenomics Database | IMPDH2   |
| Comparative Toxicogenomics Database | INCENP   |
| Comparative Toxicogenomics Database | INHBA    |
| Comparative Toxicogenomics Database | INPP4A   |
| Comparative Toxicogenomics Database | INPP4B   |
| Comparative Toxicogenomics Database | INS      |
| Comparative Toxicogenomics Database | INS1     |
| Comparative Toxicogenomics Database | INSIG1   |
| Comparative Toxicogenomics Database | INSM1    |
| Comparative Toxicogenomics Database | INSR     |
| Comparative Toxicogenomics Database | INTS2    |
| Comparative Toxicogenomics Database | INTS3    |
| Comparative Toxicogenomics Database | INTS4    |
| Comparative Toxicogenomics Database | INTS5    |
| Comparative Toxicogenomics Database | INTS6    |
| Comparative Toxicogenomics Database | INTS7    |
| Comparative Toxicogenomics Database | INTS8    |
| Comparative Toxicogenomics Database | IPCEF1   |
| Comparative Toxicogenomics Database | IPO13    |
| Comparative Toxicogenomics Database | IPO9     |
| Comparative Toxicogenomics Database | IQCK     |
| Comparative Toxicogenomics Database | IQGAP2   |
| Comparative Toxicogenomics Database | IRAK1    |
| Comparative Toxicogenomics Database | IRAK2    |
| Comparative Toxicogenomics Database | IRF1     |
| Comparative Toxicogenomics Database | IRF2BP2  |
| Comparative Toxicogenomics Database | IRF2BPL  |
| Comparative Toxicogenomics Database | IRF3     |
| Comparative Toxicogenomics Database | IRF6     |
| Comparative Toxicogenomics Database | IRF9     |
| Comparative Toxicogenomics Database | IRGM1    |
| Comparative Toxicogenomics Database | IRS1     |
| Comparative Toxicogenomics Database | IRS2     |
| Comparative Toxicogenomics Database | ISG20    |
| Comparative Toxicogenomics Database | ISOC1    |
| Comparative Toxicogenomics Database | ISYNA1   |
| Comparative Toxicogenomics Database | ITGA1    |
| Comparative Toxicogenomics Database | ITGA2    |
| Comparative Toxicogenomics Database | ITGA2B   |
| Comparative Toxicogenomics Database | ITGA3    |
| Comparative Toxicogenomics Database | ITGA5    |
| Comparative Toxicogenomics Database | ITGAL    |
| Comparative Toxicogenomics Database | ITGAM    |
| Comparative Toxicogenomics Database | ITGAV    |
| Comparative Toxicogenomics Database | ITGB1    |
| Comparative Toxicogenomics Database | ITGB2    |
| Comparative Toxicogenomics Database | ITGB3    |
| Comparative Toxicogenomics Database | ITGB3BP  |
| Comparative Toxicogenomics Database | ITIH3    |
| Comparative Toxicogenomics Database | ITPR1    |
| Comparative Toxicogenomics Database | ITPR3    |
| Comparative Toxicogenomics Database | IVD      |
| Comparative Toxicogenomics Database | IVNS1ABP |
| Comparative Toxicogenomics Database | IWS1     |
| Comparative Toxicogenomics Database | JADE1    |
| Comparative Toxicogenomics Database | JAK1     |
| Comparative Toxicogenomics Database | JAK2     |
| Comparative Toxicogenomics Database | JDP2     |

|                                     |         |
|-------------------------------------|---------|
| Comparative Toxicogenomics Database | JUN     |
| Comparative Toxicogenomics Database | JUNB    |
| Comparative Toxicogenomics Database | JUND    |
| Comparative Toxicogenomics Database | JUP     |
| Comparative Toxicogenomics Database | KANSL3  |
| Comparative Toxicogenomics Database | KAT2B   |
| Comparative Toxicogenomics Database | KAT5    |
| Comparative Toxicogenomics Database | KATNAL1 |
| Comparative Toxicogenomics Database | KCNA5   |
| Comparative Toxicogenomics Database | KCNB1   |
| Comparative Toxicogenomics Database | KCNH1   |
| Comparative Toxicogenomics Database | KCNH2   |
| Comparative Toxicogenomics Database | KCNH8   |
| Comparative Toxicogenomics Database | KCNIP3  |
| Comparative Toxicogenomics Database | KCNJ11  |
| Comparative Toxicogenomics Database | KCNK12  |
| Comparative Toxicogenomics Database | KCNN4   |
| Comparative Toxicogenomics Database | KCNS1   |
| Comparative Toxicogenomics Database | KCTD20  |
| Comparative Toxicogenomics Database | KDM5A   |
| Comparative Toxicogenomics Database | KDM5B   |
| Comparative Toxicogenomics Database | KDM6A   |
| Comparative Toxicogenomics Database | KDR     |
| Comparative Toxicogenomics Database | KEAP1   |
| Comparative Toxicogenomics Database | KEG1    |
| Comparative Toxicogenomics Database | KHDRBS1 |
| Comparative Toxicogenomics Database | KHSRP   |
| Comparative Toxicogenomics Database | KIF11   |
| Comparative Toxicogenomics Database | KIF14   |
| Comparative Toxicogenomics Database | KIF15   |
| Comparative Toxicogenomics Database | KIF18A  |
| Comparative Toxicogenomics Database | KIF20A  |
| Comparative Toxicogenomics Database | KIF23   |
| Comparative Toxicogenomics Database | KIF2C   |
| Comparative Toxicogenomics Database | KIF7    |
| Comparative Toxicogenomics Database | KIT     |
| Comparative Toxicogenomics Database | KITL    |
| Comparative Toxicogenomics Database | KL      |
| Comparative Toxicogenomics Database | KLF11   |
| Comparative Toxicogenomics Database | KLF13   |
| Comparative Toxicogenomics Database | KLF15   |
| Comparative Toxicogenomics Database | KLF2    |
| Comparative Toxicogenomics Database | KLF4    |
| Comparative Toxicogenomics Database | KLF5    |
| Comparative Toxicogenomics Database | KLF9    |
| Comparative Toxicogenomics Database | KLHL7   |
| Comparative Toxicogenomics Database | KLK2    |
| Comparative Toxicogenomics Database | KLK3    |
| Comparative Toxicogenomics Database | KLRA1   |
| Comparative Toxicogenomics Database | KLRG2   |
| Comparative Toxicogenomics Database | KLRK1   |
| Comparative Toxicogenomics Database | KMO     |
| Comparative Toxicogenomics Database | KNL1    |
| Comparative Toxicogenomics Database | KNSTRN  |
| Comparative Toxicogenomics Database | KNTC1   |
| Comparative Toxicogenomics Database | KPNA2   |
| Comparative Toxicogenomics Database | KPNB1   |
| Comparative Toxicogenomics Database | KRAS    |

|                                     |           |
|-------------------------------------|-----------|
| Comparative Toxicogenomics Database | KRI1      |
| Comparative Toxicogenomics Database | KRR1      |
| Comparative Toxicogenomics Database | KRT15     |
| Comparative Toxicogenomics Database | KRT19     |
| Comparative Toxicogenomics Database | KRT20     |
| Comparative Toxicogenomics Database | KRT5      |
| Comparative Toxicogenomics Database | KRT76     |
| Comparative Toxicogenomics Database | KYNU      |
| Comparative Toxicogenomics Database | L1CAM     |
| Comparative Toxicogenomics Database | L2HGDH    |
| Comparative Toxicogenomics Database | LACTB2    |
| Comparative Toxicogenomics Database | LAMB3     |
| Comparative Toxicogenomics Database | LAMC1     |
| Comparative Toxicogenomics Database | LAMP1     |
| Comparative Toxicogenomics Database | LAPTM5    |
| Comparative Toxicogenomics Database | LBP       |
| Comparative Toxicogenomics Database | LBR       |
| Comparative Toxicogenomics Database | LCAT      |
| Comparative Toxicogenomics Database | LCLAT1    |
| Comparative Toxicogenomics Database | LCN2      |
| Comparative Toxicogenomics Database | LCOR      |
| Comparative Toxicogenomics Database | LDAH      |
| Comparative Toxicogenomics Database | LDHB      |
| Comparative Toxicogenomics Database | LDLR      |
| Comparative Toxicogenomics Database | LEF1      |
| Comparative Toxicogenomics Database | LEFTY2    |
| Comparative Toxicogenomics Database | LEP       |
| Comparative Toxicogenomics Database | LEPR      |
| Comparative Toxicogenomics Database | LGALS1    |
| Comparative Toxicogenomics Database | LGALS3    |
| Comparative Toxicogenomics Database | LGR5      |
| Comparative Toxicogenomics Database | LHB       |
| Comparative Toxicogenomics Database | LHCGR     |
| Comparative Toxicogenomics Database | LHX2      |
| Comparative Toxicogenomics Database | LIF       |
| Comparative Toxicogenomics Database | LIFR      |
| Comparative Toxicogenomics Database | LIG1      |
| Comparative Toxicogenomics Database | LIMA1     |
| Comparative Toxicogenomics Database | LIMK1     |
| Comparative Toxicogenomics Database | LIN54     |
| Comparative Toxicogenomics Database | LIN7A     |
| Comparative Toxicogenomics Database | _INC00052 |
| Comparative Toxicogenomics Database | _INC00460 |
| Comparative Toxicogenomics Database | _INC01588 |
| Comparative Toxicogenomics Database | LIPE      |
| Comparative Toxicogenomics Database | LIPG      |
| Comparative Toxicogenomics Database | LITAF     |
| Comparative Toxicogenomics Database | LMAN2     |
| Comparative Toxicogenomics Database | LMCD1     |
| Comparative Toxicogenomics Database | LMF2      |
| Comparative Toxicogenomics Database | LMNA      |
| Comparative Toxicogenomics Database | LMNB1     |
| Comparative Toxicogenomics Database | LMNB2     |
| Comparative Toxicogenomics Database | LNPK      |
| Comparative Toxicogenomics Database | LONP1     |
| Comparative Toxicogenomics Database | LPCAT3    |
| Comparative Toxicogenomics Database | LPGAT1    |
| Comparative Toxicogenomics Database | LPIN1     |

|                                     |          |
|-------------------------------------|----------|
| Comparative Toxicogenomics Database | LPIN2    |
| Comparative Toxicogenomics Database | LPL      |
| Comparative Toxicogenomics Database | LPP      |
| Comparative Toxicogenomics Database | LRIG1    |
| Comparative Toxicogenomics Database | LRP1     |
| Comparative Toxicogenomics Database | LRP5     |
| Comparative Toxicogenomics Database | LRP8     |
| Comparative Toxicogenomics Database | LRR1     |
| Comparative Toxicogenomics Database | LRRC39   |
| Comparative Toxicogenomics Database | LRRC49   |
| Comparative Toxicogenomics Database | LRRFIP1  |
| Comparative Toxicogenomics Database | LSAMP    |
| Comparative Toxicogenomics Database | LSM3     |
| Comparative Toxicogenomics Database | LSM4     |
| Comparative Toxicogenomics Database | LSM8     |
| Comparative Toxicogenomics Database | LST1     |
| Comparative Toxicogenomics Database | LTA      |
| Comparative Toxicogenomics Database | LTBR     |
| Comparative Toxicogenomics Database | LTC4S    |
| Comparative Toxicogenomics Database | LUM      |
| Comparative Toxicogenomics Database | LXN      |
| Comparative Toxicogenomics Database | LY6D     |
| Comparative Toxicogenomics Database | LY6G     |
| Comparative Toxicogenomics Database | LYAR     |
| Comparative Toxicogenomics Database | LYPD6    |
| Comparative Toxicogenomics Database | LYRM4    |
| Comparative Toxicogenomics Database | LYRM9    |
| Comparative Toxicogenomics Database | LYZ      |
| Comparative Toxicogenomics Database | MAD2L1   |
| Comparative Toxicogenomics Database | MAD2L1BP |
| Comparative Toxicogenomics Database | MADD     |
| Comparative Toxicogenomics Database | MAF      |
| Comparative Toxicogenomics Database | MAFF     |
| Comparative Toxicogenomics Database | MAG      |
| Comparative Toxicogenomics Database | MAGOHB   |
| Comparative Toxicogenomics Database | MAK16    |
| Comparative Toxicogenomics Database | MALAT1   |
| Comparative Toxicogenomics Database | MAMDC2   |
| Comparative Toxicogenomics Database | MANEA    |
| Comparative Toxicogenomics Database | MANSC1   |
| Comparative Toxicogenomics Database | MAOA     |
| Comparative Toxicogenomics Database | MAOB     |
| Comparative Toxicogenomics Database | MAP1A    |
| Comparative Toxicogenomics Database | MAP1B    |
| Comparative Toxicogenomics Database | MAP1LC3A |
| Comparative Toxicogenomics Database | MAP1LC3B |
| Comparative Toxicogenomics Database | MAP2     |
| Comparative Toxicogenomics Database | MAP2K1   |
| Comparative Toxicogenomics Database | MAP2K2   |
| Comparative Toxicogenomics Database | MAP2K3   |
| Comparative Toxicogenomics Database | MAP2K5   |
| Comparative Toxicogenomics Database | MAP2K6   |
| Comparative Toxicogenomics Database | MAP3K1   |
| Comparative Toxicogenomics Database | MAP3K14  |
| Comparative Toxicogenomics Database | MAP3K4   |
| Comparative Toxicogenomics Database | MAP3K5   |
| Comparative Toxicogenomics Database | MAP4     |
| Comparative Toxicogenomics Database | MAPK1    |

|                                     |          |
|-------------------------------------|----------|
| Comparative Toxicogenomics Database | MAPK13   |
| Comparative Toxicogenomics Database | MAPK14   |
| Comparative Toxicogenomics Database | MAPK3    |
| Comparative Toxicogenomics Database | MAPK7    |
| Comparative Toxicogenomics Database | MAPK8    |
| Comparative Toxicogenomics Database | MAPK9    |
| Comparative Toxicogenomics Database | MAPT     |
| Comparative Toxicogenomics Database | MARCHF5  |
| Comparative Toxicogenomics Database | MARCKSL1 |
| Comparative Toxicogenomics Database | MARK2    |
| Comparative Toxicogenomics Database | MASTL    |
| Comparative Toxicogenomics Database | MAT2A    |
| Comparative Toxicogenomics Database | MAT2B    |
| Comparative Toxicogenomics Database | MATN3    |
| Comparative Toxicogenomics Database | MATR3    |
| Comparative Toxicogenomics Database | MAX      |
| Comparative Toxicogenomics Database | MBD1     |
| Comparative Toxicogenomics Database | MBD2     |
| Comparative Toxicogenomics Database | MBD3     |
| Comparative Toxicogenomics Database | MBOAT7   |
| Comparative Toxicogenomics Database | MBTPS1   |
| Comparative Toxicogenomics Database | MC1R     |
| Comparative Toxicogenomics Database | MC2R     |
| Comparative Toxicogenomics Database | MCAM     |
| Comparative Toxicogenomics Database | MCCC1    |
| Comparative Toxicogenomics Database | MCEE     |
| Comparative Toxicogenomics Database | MCL1     |
| Comparative Toxicogenomics Database | MCM10    |
| Comparative Toxicogenomics Database | MCM2     |
| Comparative Toxicogenomics Database | MCM3     |
| Comparative Toxicogenomics Database | MCM4     |
| Comparative Toxicogenomics Database | MCM5     |
| Comparative Toxicogenomics Database | MCM6     |
| Comparative Toxicogenomics Database | MCM7     |
| Comparative Toxicogenomics Database | MCM8     |
| Comparative Toxicogenomics Database | MCPT1    |
| Comparative Toxicogenomics Database | MCPT2    |
| Comparative Toxicogenomics Database | MCPT4    |
| Comparative Toxicogenomics Database | MDFIC    |
| Comparative Toxicogenomics Database | MDM2     |
| Comparative Toxicogenomics Database | ME1      |
| Comparative Toxicogenomics Database | MEAF6    |
| Comparative Toxicogenomics Database | MECP2    |
| Comparative Toxicogenomics Database | MECR     |
| Comparative Toxicogenomics Database | MED13    |
| Comparative Toxicogenomics Database | MED24    |
| Comparative Toxicogenomics Database | MED28    |
| Comparative Toxicogenomics Database | MED29    |
| Comparative Toxicogenomics Database | MEDAG    |
| Comparative Toxicogenomics Database | MEF2C    |
| Comparative Toxicogenomics Database | MELK     |
| Comparative Toxicogenomics Database | MEMO1    |
| Comparative Toxicogenomics Database | MEP1A    |
| Comparative Toxicogenomics Database | MET      |
| Comparative Toxicogenomics Database | METAP2   |
| Comparative Toxicogenomics Database | METRNL   |
| Comparative Toxicogenomics Database | METTTL18 |
| Comparative Toxicogenomics Database | METTTL7A |



Comparative Toxicogenomics Database METTL7A1  
Comparative Toxicogenomics Database MFAP5  
Comparative Toxicogenomics Database MFGE8  
Comparative Toxicogenomics Database MFN1  
Comparative Toxicogenomics Database MFN2  
Comparative Toxicogenomics Database MFSD4A  
Comparative Toxicogenomics Database MGA  
Comparative Toxicogenomics Database MGAT4A  
Comparative Toxicogenomics Database MGLL  
Comparative Toxicogenomics Database MGMT  
Comparative Toxicogenomics Database MGP  
Comparative Toxicogenomics Database MGST3  
Comparative Toxicogenomics Database MIA  
Comparative Toxicogenomics Database MICA  
Comparative Toxicogenomics Database MICB  
Comparative Toxicogenomics Database MID1IP1  
Comparative Toxicogenomics Database MIR1  
Comparative Toxicogenomics Database MIR100  
Comparative Toxicogenomics Database MIR101A  
Comparative Toxicogenomics Database MIR101B  
Comparative Toxicogenomics Database MIR103A1  
Comparative Toxicogenomics Database MIR103A2  
Comparative Toxicogenomics Database MIR106A  
Comparative Toxicogenomics Database MIR106B  
Comparative Toxicogenomics Database MIR10A  
Comparative Toxicogenomics Database MIR10B  
Comparative Toxicogenomics Database MIR122  
Comparative Toxicogenomics Database MIR125A  
Comparative Toxicogenomics Database MIR126  
Comparative Toxicogenomics Database MIR129-2  
Comparative Toxicogenomics Database MIR130A  
Comparative Toxicogenomics Database MIR133A1  
Comparative Toxicogenomics Database MIR133B  
Comparative Toxicogenomics Database MIR134  
Comparative Toxicogenomics Database MIR136  
Comparative Toxicogenomics Database MIR137  
Comparative Toxicogenomics Database MIR142  
Comparative Toxicogenomics Database MIR143  
Comparative Toxicogenomics Database MIR145  
Comparative Toxicogenomics Database MIR146A  
Comparative Toxicogenomics Database MIR146B  
Comparative Toxicogenomics Database MIR148A  
Comparative Toxicogenomics Database MIR152  
Comparative Toxicogenomics Database MIR155  
Comparative Toxicogenomics Database MIR15A  
Comparative Toxicogenomics Database MIR16-1  
Comparative Toxicogenomics Database MIR17  
Comparative Toxicogenomics Database MIR17HG  
Comparative Toxicogenomics Database MIR181A2  
Comparative Toxicogenomics Database MIR181C  
Comparative Toxicogenomics Database MIR183  
Comparative Toxicogenomics Database MIR185  
Comparative Toxicogenomics Database MIR186  
Comparative Toxicogenomics Database MIR1902  
Comparative Toxicogenomics Database MIR193A  
Comparative Toxicogenomics Database MIR194  
Comparative Toxicogenomics Database MIR195  
Comparative Toxicogenomics Database MIR196A1

Comparative Toxicogenomics Database MIR198  
Comparative Toxicogenomics Database MIR1983  
Comparative Toxicogenomics Database MIR19A  
Comparative Toxicogenomics Database MIR200B  
Comparative Toxicogenomics Database MIR200C  
Comparative Toxicogenomics Database MIR202  
Comparative Toxicogenomics Database MIR203  
Comparative Toxicogenomics Database MIR203A  
Comparative Toxicogenomics Database MIR204  
Comparative Toxicogenomics Database MIR205  
Comparative Toxicogenomics Database MIR206  
Comparative Toxicogenomics Database MIR208A  
Comparative Toxicogenomics Database MIR20A  
Comparative Toxicogenomics Database MIR20B  
Comparative Toxicogenomics Database MIR21  
Comparative Toxicogenomics Database MIR214  
Comparative Toxicogenomics Database MIR218  
Comparative Toxicogenomics Database MIR22  
Comparative Toxicogenomics Database MIR221  
Comparative Toxicogenomics Database MIR23A  
Comparative Toxicogenomics Database MIR23B  
Comparative Toxicogenomics Database MIR24-1  
Comparative Toxicogenomics Database MIR25  
Comparative Toxicogenomics Database MIR26A1  
Comparative Toxicogenomics Database MIR27A  
Comparative Toxicogenomics Database MIR27B  
Comparative Toxicogenomics Database MIR28  
Comparative Toxicogenomics Database MIR29A  
Comparative Toxicogenomics Database MIR29B  
Comparative Toxicogenomics Database MIR29C  
Comparative Toxicogenomics Database MIR301B  
Comparative Toxicogenomics Database MIR302B  
Comparative Toxicogenomics Database MIR302D  
Comparative Toxicogenomics Database MIR30A  
Comparative Toxicogenomics Database MIR30C1  
Comparative Toxicogenomics Database MIR30D  
Comparative Toxicogenomics Database MIR30E  
Comparative Toxicogenomics Database MIR31  
Comparative Toxicogenomics Database MIR323  
Comparative Toxicogenomics Database MIR323A  
Comparative Toxicogenomics Database MIR324  
Comparative Toxicogenomics Database MIR326  
Comparative Toxicogenomics Database MIR328  
Comparative Toxicogenomics Database MIR337  
Comparative Toxicogenomics Database MIR339  
Comparative Toxicogenomics Database MIR33A  
Comparative Toxicogenomics Database MIR340  
Comparative Toxicogenomics Database MIR342  
Comparative Toxicogenomics Database MIR345  
Comparative Toxicogenomics Database MIR34A  
Comparative Toxicogenomics Database MIR34C  
Comparative Toxicogenomics Database MIR350  
Comparative Toxicogenomics Database MIR351  
Comparative Toxicogenomics Database MIR352  
Comparative Toxicogenomics Database MIR362  
Comparative Toxicogenomics Database MIR363  
Comparative Toxicogenomics Database MIR369  
Comparative Toxicogenomics Database MIR374B

Comparative Toxicogenomics Database MIR375  
Comparative Toxicogenomics Database MIR376B  
Comparative Toxicogenomics Database MIR378A  
Comparative Toxicogenomics Database MIR3911  
Comparative Toxicogenomics Database MIR3916  
Comparative Toxicogenomics Database MIR421  
Comparative Toxicogenomics Database MIR424  
Comparative Toxicogenomics Database MIR434  
Comparative Toxicogenomics Database IR4435-2HG  
Comparative Toxicogenomics Database MIR450A1  
Comparative Toxicogenomics Database MIR450B  
Comparative Toxicogenomics Database MIR455  
Comparative Toxicogenomics Database MIR466D  
Comparative Toxicogenomics Database MIR487B  
Comparative Toxicogenomics Database MIR489  
Comparative Toxicogenomics Database MIR491  
Comparative Toxicogenomics Database MIR494  
Comparative Toxicogenomics Database MIR497  
Comparative Toxicogenomics Database MIR501  
Comparative Toxicogenomics Database MIR503  
Comparative Toxicogenomics Database MIR504  
Comparative Toxicogenomics Database MIR507  
Comparative Toxicogenomics Database MIR517A  
Comparative Toxicogenomics Database MIR518B  
Comparative Toxicogenomics Database MIR518C  
Comparative Toxicogenomics Database MIR518F  
Comparative Toxicogenomics Database MIR519B  
Comparative Toxicogenomics Database MIR525  
Comparative Toxicogenomics Database MIR532  
Comparative Toxicogenomics Database MIR539  
Comparative Toxicogenomics Database MIR542  
Comparative Toxicogenomics Database MIR548V  
Comparative Toxicogenomics Database MIR569  
Comparative Toxicogenomics Database MIR570  
Comparative Toxicogenomics Database MIR571  
Comparative Toxicogenomics Database MIR572  
Comparative Toxicogenomics Database MIR574  
Comparative Toxicogenomics Database MIR576  
Comparative Toxicogenomics Database MIR582  
Comparative Toxicogenomics Database MIR584  
Comparative Toxicogenomics Database MIR590  
Comparative Toxicogenomics Database MIR601  
Comparative Toxicogenomics Database MIR615  
Comparative Toxicogenomics Database MIR622  
Comparative Toxicogenomics Database MIR625  
Comparative Toxicogenomics Database MIR629  
Comparative Toxicogenomics Database MIR631  
Comparative Toxicogenomics Database MIR632  
Comparative Toxicogenomics Database MIR638  
Comparative Toxicogenomics Database MIR639  
Comparative Toxicogenomics Database MIR645  
Comparative Toxicogenomics Database MIR652  
Comparative Toxicogenomics Database MIR657  
Comparative Toxicogenomics Database MIR659  
Comparative Toxicogenomics Database MIR663A  
Comparative Toxicogenomics Database MIR667  
Comparative Toxicogenomics Database MIR671  
Comparative Toxicogenomics Database MIR687

|                                     |            |
|-------------------------------------|------------|
| Comparative Toxicogenomics Database | MIR708     |
| Comparative Toxicogenomics Database | MIR760     |
| Comparative Toxicogenomics Database | MIR888     |
| Comparative Toxicogenomics Database | MIR9       |
| Comparative Toxicogenomics Database | MIR92A2    |
| Comparative Toxicogenomics Database | MIR92B     |
| Comparative Toxicogenomics Database | MIR93      |
| Comparative Toxicogenomics Database | MIR96      |
| Comparative Toxicogenomics Database | MIR98      |
| Comparative Toxicogenomics Database | MIRLET7C   |
| Comparative Toxicogenomics Database | MIRLET7C-1 |
| Comparative Toxicogenomics Database | MIRLET7E   |
| Comparative Toxicogenomics Database | MIS18BP1   |
| Comparative Toxicogenomics Database | MITF       |
| Comparative Toxicogenomics Database | MKI67      |
| Comparative Toxicogenomics Database | MKNK2      |
| Comparative Toxicogenomics Database | MLYCD      |
| Comparative Toxicogenomics Database | MMD        |
| Comparative Toxicogenomics Database | MMD2       |
| Comparative Toxicogenomics Database | MME        |
| Comparative Toxicogenomics Database | MMP1       |
| Comparative Toxicogenomics Database | MMP13      |
| Comparative Toxicogenomics Database | MMP16      |
| Comparative Toxicogenomics Database | MMP2       |
| Comparative Toxicogenomics Database | MMP3       |
| Comparative Toxicogenomics Database | MMP7       |
| Comparative Toxicogenomics Database | MMP9       |
| Comparative Toxicogenomics Database | MMUT       |
| Comparative Toxicogenomics Database | MNDA       |
| Comparative Toxicogenomics Database | MORC3      |
| Comparative Toxicogenomics Database | MORF4L1    |
| Comparative Toxicogenomics Database | MOS        |
| Comparative Toxicogenomics Database | PHOSPH10   |
| Comparative Toxicogenomics Database | PHOSPH9    |
| Comparative Toxicogenomics Database | MPO        |
| Comparative Toxicogenomics Database | MPPED2     |
| Comparative Toxicogenomics Database | MPRIP      |
| Comparative Toxicogenomics Database | MPST       |
| Comparative Toxicogenomics Database | MPZL2      |
| Comparative Toxicogenomics Database | MR1        |
| Comparative Toxicogenomics Database | MRC1       |
| Comparative Toxicogenomics Database | MRE11      |
| Comparative Toxicogenomics Database | MRE11A     |
| Comparative Toxicogenomics Database | MRPL11     |
| Comparative Toxicogenomics Database | MRPL12     |
| Comparative Toxicogenomics Database | MRPL13     |
| Comparative Toxicogenomics Database | MRPL15     |
| Comparative Toxicogenomics Database | MRPL16     |
| Comparative Toxicogenomics Database | MRPL19     |
| Comparative Toxicogenomics Database | MRPL20     |
| Comparative Toxicogenomics Database | MRPL22     |
| Comparative Toxicogenomics Database | MRPL24     |
| Comparative Toxicogenomics Database | MRPL27     |
| Comparative Toxicogenomics Database | MRPL3      |
| Comparative Toxicogenomics Database | MRPL33     |
| Comparative Toxicogenomics Database | MRPL34     |
| Comparative Toxicogenomics Database | MRPL36     |
| Comparative Toxicogenomics Database | MRPL4      |

|                                     |         |
|-------------------------------------|---------|
| Comparative Toxicogenomics Database | MRPL40  |
| Comparative Toxicogenomics Database | MRPL44  |
| Comparative Toxicogenomics Database | MRPL46  |
| Comparative Toxicogenomics Database | MRPL48  |
| Comparative Toxicogenomics Database | MRPL49  |
| Comparative Toxicogenomics Database | MRPS11  |
| Comparative Toxicogenomics Database | MRPS12  |
| Comparative Toxicogenomics Database | MRPS15  |
| Comparative Toxicogenomics Database | MRPS16  |
| Comparative Toxicogenomics Database | MRPS17  |
| Comparative Toxicogenomics Database | MRPS18A |
| Comparative Toxicogenomics Database | MRPS18B |
| Comparative Toxicogenomics Database | MRPS18C |
| Comparative Toxicogenomics Database | MRPS2   |
| Comparative Toxicogenomics Database | MRPS27  |
| Comparative Toxicogenomics Database | MRPS28  |
| Comparative Toxicogenomics Database | MRPS31  |
| Comparative Toxicogenomics Database | MRPS33  |
| Comparative Toxicogenomics Database | MRPS6   |
| Comparative Toxicogenomics Database | MRPS7   |
| Comparative Toxicogenomics Database | MRTFB   |
| Comparative Toxicogenomics Database | MRTO4   |
| Comparative Toxicogenomics Database | MS4A6A  |
| Comparative Toxicogenomics Database | MS4A6BL |
| Comparative Toxicogenomics Database | MSH2    |
| Comparative Toxicogenomics Database | MSH6    |
| Comparative Toxicogenomics Database | MSI1    |
| Comparative Toxicogenomics Database | MSI2    |
| Comparative Toxicogenomics Database | MSMO1   |
| Comparative Toxicogenomics Database | MSR1    |
| Comparative Toxicogenomics Database | MSRA    |
| Comparative Toxicogenomics Database | MT1     |
| Comparative Toxicogenomics Database | MT1H    |
| Comparative Toxicogenomics Database | MT1X    |
| Comparative Toxicogenomics Database | MTA1    |
| Comparative Toxicogenomics Database | MTCH2   |
| Comparative Toxicogenomics Database | MTERF1A |
| Comparative Toxicogenomics Database | MTF1    |
| Comparative Toxicogenomics Database | MTFP1   |
| Comparative Toxicogenomics Database | MTFR2   |
| Comparative Toxicogenomics Database | MTHFD1  |
| Comparative Toxicogenomics Database | MTHFD1L |
| Comparative Toxicogenomics Database | MTHFD2  |
| Comparative Toxicogenomics Database | MTMR4   |
| Comparative Toxicogenomics Database | MTMR7   |
| Comparative Toxicogenomics Database | MTNR1A  |
| Comparative Toxicogenomics Database | MTNR1B  |
| Comparative Toxicogenomics Database | MTOR    |
| Comparative Toxicogenomics Database | MTPN    |
| Comparative Toxicogenomics Database | MTREX   |
| Comparative Toxicogenomics Database | MTUS1   |
| Comparative Toxicogenomics Database | MTX1    |
| Comparative Toxicogenomics Database | MUC1    |
| Comparative Toxicogenomics Database | MUC5AC  |
| Comparative Toxicogenomics Database | MUG2    |
| Comparative Toxicogenomics Database | MUP1    |
| Comparative Toxicogenomics Database | MUP14   |
| Comparative Toxicogenomics Database | MUP21   |

|                                     |         |
|-------------------------------------|---------|
| Comparative Toxicogenomics Database | MUP3    |
| Comparative Toxicogenomics Database | MUP5    |
| Comparative Toxicogenomics Database | MUP9    |
| Comparative Toxicogenomics Database | MVP     |
| Comparative Toxicogenomics Database | MYBBP1A |
| Comparative Toxicogenomics Database | MYBL2   |
| Comparative Toxicogenomics Database | MYC     |
| Comparative Toxicogenomics Database | MYCN    |
| Comparative Toxicogenomics Database | MYD88   |
| Comparative Toxicogenomics Database | MYF5    |
| Comparative Toxicogenomics Database | MYG1    |
| Comparative Toxicogenomics Database | MYH10   |
| Comparative Toxicogenomics Database | MYH11   |
| Comparative Toxicogenomics Database | MYH14   |
| Comparative Toxicogenomics Database | MYH6    |
| Comparative Toxicogenomics Database | MYH7    |
| Comparative Toxicogenomics Database | MYL1    |
| Comparative Toxicogenomics Database | MYL2    |
| Comparative Toxicogenomics Database | MYLK    |
| Comparative Toxicogenomics Database | MYLPF   |
| Comparative Toxicogenomics Database | MYO10   |
| Comparative Toxicogenomics Database | MYO18A  |
| Comparative Toxicogenomics Database | MYO1B   |
| Comparative Toxicogenomics Database | MYO5A   |
| Comparative Toxicogenomics Database | MYOCD   |
| Comparative Toxicogenomics Database | MYOD1   |
| Comparative Toxicogenomics Database | MYOG    |
| Comparative Toxicogenomics Database | MZT1    |
| Comparative Toxicogenomics Database | N4BP1   |
| Comparative Toxicogenomics Database | NAB1    |
| Comparative Toxicogenomics Database | NABP1   |
| Comparative Toxicogenomics Database | NACA    |
| Comparative Toxicogenomics Database | NADK2   |
| Comparative Toxicogenomics Database | NAIP    |
| Comparative Toxicogenomics Database | NAMPT   |
| Comparative Toxicogenomics Database | NANOG   |
| Comparative Toxicogenomics Database | NANOS1  |
| Comparative Toxicogenomics Database | NASP    |
| Comparative Toxicogenomics Database | NAT1    |
| Comparative Toxicogenomics Database | NAT8    |
| Comparative Toxicogenomics Database | NBEA    |
| Comparative Toxicogenomics Database | NBN     |
| Comparative Toxicogenomics Database | NCAPG   |
| Comparative Toxicogenomics Database | NCAPG2  |
| Comparative Toxicogenomics Database | NCAPH   |
| Comparative Toxicogenomics Database | NCBP1   |
| Comparative Toxicogenomics Database | NCF1    |
| Comparative Toxicogenomics Database | NCF2    |
| Comparative Toxicogenomics Database | NCL     |
| Comparative Toxicogenomics Database | NCOA1   |
| Comparative Toxicogenomics Database | NCOA2   |
| Comparative Toxicogenomics Database | NCOA3   |
| Comparative Toxicogenomics Database | NCOA4   |
| Comparative Toxicogenomics Database | NCOA5   |
| Comparative Toxicogenomics Database | NCOA6   |
| Comparative Toxicogenomics Database | NCOA7   |
| Comparative Toxicogenomics Database | NCOR1   |
| Comparative Toxicogenomics Database | NCOR2   |

|                                     |         |
|-------------------------------------|---------|
| Comparative Toxicogenomics Database | ND1     |
| Comparative Toxicogenomics Database | NDC1    |
| Comparative Toxicogenomics Database | NDC80   |
| Comparative Toxicogenomics Database | NDE1    |
| Comparative Toxicogenomics Database | NDRG1   |
| Comparative Toxicogenomics Database | NDUFA1  |
| Comparative Toxicogenomics Database | NDUFA13 |
| Comparative Toxicogenomics Database | NDUFA2  |
| Comparative Toxicogenomics Database | NDUFA3  |
| Comparative Toxicogenomics Database | NDUFA4  |
| Comparative Toxicogenomics Database | NDUFA5  |
| Comparative Toxicogenomics Database | NDUFA6  |
| Comparative Toxicogenomics Database | NDUFA7  |
| Comparative Toxicogenomics Database | NDUFAF3 |
| Comparative Toxicogenomics Database | NDUFB3  |
| Comparative Toxicogenomics Database | NDUFB4  |
| Comparative Toxicogenomics Database | NDUFB5  |
| Comparative Toxicogenomics Database | NDUFB7  |
| Comparative Toxicogenomics Database | NDUFB8  |
| Comparative Toxicogenomics Database | NDUFB9  |
| Comparative Toxicogenomics Database | NDUFC1  |
| Comparative Toxicogenomics Database | NDUFS1  |
| Comparative Toxicogenomics Database | NDUFS3  |
| Comparative Toxicogenomics Database | NDUFS4  |
| Comparative Toxicogenomics Database | NDUFS5  |
| Comparative Toxicogenomics Database | NDUFS6  |
| Comparative Toxicogenomics Database | NDUFV1  |
| Comparative Toxicogenomics Database | NDUFV2  |
| Comparative Toxicogenomics Database | NEBL    |
| Comparative Toxicogenomics Database | NECAP2  |
| Comparative Toxicogenomics Database | NECTIN2 |
| Comparative Toxicogenomics Database | NEDD4   |
| Comparative Toxicogenomics Database | NEDD4L  |
| Comparative Toxicogenomics Database | NEDD9   |
| Comparative Toxicogenomics Database | NEFH    |
| Comparative Toxicogenomics Database | NEIL2   |
| Comparative Toxicogenomics Database | NEIL3   |
| Comparative Toxicogenomics Database | NEK2    |
| Comparative Toxicogenomics Database | NELL2   |
| Comparative Toxicogenomics Database | NEMP1   |
| Comparative Toxicogenomics Database | NEO1    |
| Comparative Toxicogenomics Database | NES     |
| Comparative Toxicogenomics Database | NFAT5   |
| Comparative Toxicogenomics Database | NFATC1  |
| Comparative Toxicogenomics Database | NFE2L1  |
| Comparative Toxicogenomics Database | NFE2L2  |
| Comparative Toxicogenomics Database | NFE2L3  |
| Comparative Toxicogenomics Database | NFIX    |
| Comparative Toxicogenomics Database | NFKB1   |
| Comparative Toxicogenomics Database | NFKB2   |
| Comparative Toxicogenomics Database | NFKBIA  |
| Comparative Toxicogenomics Database | NFKBIB  |
| Comparative Toxicogenomics Database | NFKBIZ  |
| Comparative Toxicogenomics Database | NFS1    |
| Comparative Toxicogenomics Database | NGF     |
| Comparative Toxicogenomics Database | NGFR    |
| Comparative Toxicogenomics Database | NID2    |
| Comparative Toxicogenomics Database | NIM1K   |

|                                     |        |
|-------------------------------------|--------|
| Comparative Toxicogenomics Database | NINL   |
| Comparative Toxicogenomics Database | NKAIN1 |
| Comparative Toxicogenomics Database | NKX1-2 |
| Comparative Toxicogenomics Database | NKX2-1 |
| Comparative Toxicogenomics Database | NKX2-2 |
| Comparative Toxicogenomics Database | NKX3-1 |
| Comparative Toxicogenomics Database | NKX6-1 |
| Comparative Toxicogenomics Database | NLRP1  |
| Comparative Toxicogenomics Database | NLRP12 |
| Comparative Toxicogenomics Database | NLRP3  |
| Comparative Toxicogenomics Database | NME1   |
| Comparative Toxicogenomics Database | NME4   |
| Comparative Toxicogenomics Database | NMNAT1 |
| Comparative Toxicogenomics Database | NMRAL1 |
| Comparative Toxicogenomics Database | NMRK1  |
| Comparative Toxicogenomics Database | NMU    |
| Comparative Toxicogenomics Database | NNMT   |
| Comparative Toxicogenomics Database | NOC2L  |
| Comparative Toxicogenomics Database | NOC3L  |
| Comparative Toxicogenomics Database | NOD1   |
| Comparative Toxicogenomics Database | NOL11  |
| Comparative Toxicogenomics Database | NOL12  |
| Comparative Toxicogenomics Database | NOLC1  |
| Comparative Toxicogenomics Database | NOM1   |
| Comparative Toxicogenomics Database | NOP16  |
| Comparative Toxicogenomics Database | NOP56  |
| Comparative Toxicogenomics Database | NOS    |
| Comparative Toxicogenomics Database | NOS1   |
| Comparative Toxicogenomics Database | NOS2   |
| Comparative Toxicogenomics Database | NOS2A  |
| Comparative Toxicogenomics Database | NOS3   |
| Comparative Toxicogenomics Database | NOTCH1 |
| Comparative Toxicogenomics Database | NOTCH2 |
| Comparative Toxicogenomics Database | NOX1   |
| Comparative Toxicogenomics Database | NOX2   |
| Comparative Toxicogenomics Database | NOX3   |
| Comparative Toxicogenomics Database | NOX4   |
| Comparative Toxicogenomics Database | NPAS2  |
| Comparative Toxicogenomics Database | NPAS3  |
| Comparative Toxicogenomics Database | NPC1   |
| Comparative Toxicogenomics Database | NPC2   |
| Comparative Toxicogenomics Database | NPHS1  |
| Comparative Toxicogenomics Database | NPHS2  |
| Comparative Toxicogenomics Database | NPPA   |
| Comparative Toxicogenomics Database | NPPB   |
| Comparative Toxicogenomics Database | NPPC   |
| Comparative Toxicogenomics Database | NPY1R  |
| Comparative Toxicogenomics Database | NQO1   |
| Comparative Toxicogenomics Database | NQO2   |
| Comparative Toxicogenomics Database | NR0B2  |
| Comparative Toxicogenomics Database | NR1D1  |
| Comparative Toxicogenomics Database | NR1H3  |
| Comparative Toxicogenomics Database | NR1H4  |
| Comparative Toxicogenomics Database | NR1I2  |
| Comparative Toxicogenomics Database | NR1I3  |
| Comparative Toxicogenomics Database | NR2F2  |
| Comparative Toxicogenomics Database | NR3C1  |
| Comparative Toxicogenomics Database | NRAS   |



|                                     |          |
|-------------------------------------|----------|
| Comparative Toxicogenomics Database | NREP     |
| Comparative Toxicogenomics Database | NRF1     |
| Comparative Toxicogenomics Database | NRG1     |
| Comparative Toxicogenomics Database | NRIP1    |
| Comparative Toxicogenomics Database | NRM      |
| Comparative Toxicogenomics Database | NSD2     |
| Comparative Toxicogenomics Database | NT5C3    |
| Comparative Toxicogenomics Database | NT5DC2   |
| Comparative Toxicogenomics Database | NT5M     |
| Comparative Toxicogenomics Database | NTMT1    |
| Comparative Toxicogenomics Database | NTN4     |
| Comparative Toxicogenomics Database | NTPCR    |
| Comparative Toxicogenomics Database | NTRK3    |
| Comparative Toxicogenomics Database | NTS      |
| Comparative Toxicogenomics Database | NUBP2    |
| Comparative Toxicogenomics Database | NUCB1    |
| Comparative Toxicogenomics Database | NUCB2    |
| Comparative Toxicogenomics Database | NUDCD2   |
| Comparative Toxicogenomics Database | NUDT1    |
| Comparative Toxicogenomics Database | NUDT12   |
| Comparative Toxicogenomics Database | NUDT16   |
| Comparative Toxicogenomics Database | NUDT16L1 |
| Comparative Toxicogenomics Database | NUDT7    |
| Comparative Toxicogenomics Database | NUF2     |
| Comparative Toxicogenomics Database | NUFIP2   |
| Comparative Toxicogenomics Database | NUMA1    |
| Comparative Toxicogenomics Database | NUP107   |
| Comparative Toxicogenomics Database | NUP153   |
| Comparative Toxicogenomics Database | NUP155   |
| Comparative Toxicogenomics Database | NUP210   |
| Comparative Toxicogenomics Database | NUP98    |
| Comparative Toxicogenomics Database | NUPR1    |
| Comparative Toxicogenomics Database | NUSAP1   |
| Comparative Toxicogenomics Database | NVL      |
| Comparative Toxicogenomics Database | NYNRIN   |
| Comparative Toxicogenomics Database | OASL     |
| Comparative Toxicogenomics Database | OCLN     |
| Comparative Toxicogenomics Database | ODC1     |
| Comparative Toxicogenomics Database | OGDH     |
| Comparative Toxicogenomics Database | OGDHL    |
| Comparative Toxicogenomics Database | OGFR     |
| Comparative Toxicogenomics Database | OGG1     |
| Comparative Toxicogenomics Database | OIP5     |
| Comparative Toxicogenomics Database | OLFM1    |
| Comparative Toxicogenomics Database | OLFML3   |
| Comparative Toxicogenomics Database | OLFR166  |
| Comparative Toxicogenomics Database | OLR1     |
| Comparative Toxicogenomics Database | OPA1     |
| Comparative Toxicogenomics Database | OPTN     |
| Comparative Toxicogenomics Database | ORC1     |
| Comparative Toxicogenomics Database | ORC6     |
| Comparative Toxicogenomics Database | ORM1     |
| Comparative Toxicogenomics Database | ORMDL2   |
| Comparative Toxicogenomics Database | ORMDL3   |
| Comparative Toxicogenomics Database | OSBPL3   |
| Comparative Toxicogenomics Database | OSER1-DT |
| Comparative Toxicogenomics Database | OVAL     |
| Comparative Toxicogenomics Database | OXCT1    |

|                                     |           |
|-------------------------------------|-----------|
| Comparative Toxicogenomics Database | OXTR      |
| Comparative Toxicogenomics Database | P2RX4     |
| Comparative Toxicogenomics Database | P2RX7     |
| Comparative Toxicogenomics Database | P2RY12    |
| Comparative Toxicogenomics Database | P4HA1     |
| Comparative Toxicogenomics Database | PAF1      |
| Comparative Toxicogenomics Database | PAH       |
| Comparative Toxicogenomics Database | PAICS     |
| Comparative Toxicogenomics Database | PAK1      |
| Comparative Toxicogenomics Database | PAK2      |
| Comparative Toxicogenomics Database | PAK3      |
| Comparative Toxicogenomics Database | ALM2AKAP2 |
| Comparative Toxicogenomics Database | PAPPA     |
| Comparative Toxicogenomics Database | PAPSS1    |
| Comparative Toxicogenomics Database | PAQR5     |
| Comparative Toxicogenomics Database | PARM1     |
| Comparative Toxicogenomics Database | PARN      |
| Comparative Toxicogenomics Database | PARP1     |
| Comparative Toxicogenomics Database | PARP2     |
| Comparative Toxicogenomics Database | PARPBP    |
| Comparative Toxicogenomics Database | PARVB     |
| Comparative Toxicogenomics Database | PAX3      |
| Comparative Toxicogenomics Database | PAX8      |
| Comparative Toxicogenomics Database | PBDC1     |
| Comparative Toxicogenomics Database | PBK       |
| Comparative Toxicogenomics Database | PBRM1     |
| Comparative Toxicogenomics Database | PBX1      |
| Comparative Toxicogenomics Database | PC        |
| Comparative Toxicogenomics Database | PCCB      |
| Comparative Toxicogenomics Database | PCK1      |
| Comparative Toxicogenomics Database | PCK2      |
| Comparative Toxicogenomics Database | PCLAF     |
| Comparative Toxicogenomics Database | PCNA      |
| Comparative Toxicogenomics Database | PCP4      |
| Comparative Toxicogenomics Database | PCSK1     |
| Comparative Toxicogenomics Database | PCSK5     |
| Comparative Toxicogenomics Database | PCSK6     |
| Comparative Toxicogenomics Database | PCSK9     |
| Comparative Toxicogenomics Database | PDCD11    |
| Comparative Toxicogenomics Database | PDCD2     |
| Comparative Toxicogenomics Database | PDCD4     |
| Comparative Toxicogenomics Database | PDCD7     |
| Comparative Toxicogenomics Database | PDE2A     |
| Comparative Toxicogenomics Database | PDE4D     |
| Comparative Toxicogenomics Database | PDE5A     |
| Comparative Toxicogenomics Database | PDGFB     |
| Comparative Toxicogenomics Database | PDGFRA    |
| Comparative Toxicogenomics Database | PDGFRB    |
| Comparative Toxicogenomics Database | PDHA1     |
| Comparative Toxicogenomics Database | PDHB      |
| Comparative Toxicogenomics Database | PDHX      |
| Comparative Toxicogenomics Database | PDIA3     |
| Comparative Toxicogenomics Database | PDIA4     |
| Comparative Toxicogenomics Database | PDK1      |
| Comparative Toxicogenomics Database | PDK4      |
| Comparative Toxicogenomics Database | PDL1      |
| Comparative Toxicogenomics Database | PDLIM1    |
| Comparative Toxicogenomics Database | PDPK1     |

|                                     |          |
|-------------------------------------|----------|
| Comparative Toxicogenomics Database | PDSS1    |
| Comparative Toxicogenomics Database | PDX1     |
| Comparative Toxicogenomics Database | PDXP     |
| Comparative Toxicogenomics Database | PDYN     |
| Comparative Toxicogenomics Database | PDZD2    |
| Comparative Toxicogenomics Database | PDZK1    |
| Comparative Toxicogenomics Database | PDZK1IP1 |
| Comparative Toxicogenomics Database | PEBP1    |
| Comparative Toxicogenomics Database | PECAM1   |
| Comparative Toxicogenomics Database | PEG3     |
| Comparative Toxicogenomics Database | PELP1    |
| Comparative Toxicogenomics Database | PERP     |
| Comparative Toxicogenomics Database | PF4      |
| Comparative Toxicogenomics Database | PFKFB1   |
| Comparative Toxicogenomics Database | PFKFB3   |
| Comparative Toxicogenomics Database | PFKM     |
| Comparative Toxicogenomics Database | PFKP     |
| Comparative Toxicogenomics Database | PGAM1    |
| Comparative Toxicogenomics Database | PGF      |
| Comparative Toxicogenomics Database | PGK1     |
| Comparative Toxicogenomics Database | PGM2L1   |
| Comparative Toxicogenomics Database | PGP      |
| Comparative Toxicogenomics Database | PGPEP1   |
| Comparative Toxicogenomics Database | PGR      |
| Comparative Toxicogenomics Database | PGRMC1   |
| Comparative Toxicogenomics Database | PHF14    |
| Comparative Toxicogenomics Database | PHF19    |
| Comparative Toxicogenomics Database | PHF5A    |
| Comparative Toxicogenomics Database | PHLDB2   |
| Comparative Toxicogenomics Database | PHTF1    |
| Comparative Toxicogenomics Database | PHTF2    |
| Comparative Toxicogenomics Database | PHYH     |
| Comparative Toxicogenomics Database | PI4K2B   |
| Comparative Toxicogenomics Database | PIAS3    |
| Comparative Toxicogenomics Database | PID1     |
| Comparative Toxicogenomics Database | PIDD1    |
| Comparative Toxicogenomics Database | PIGU     |
| Comparative Toxicogenomics Database | PIGZ     |
| Comparative Toxicogenomics Database | PIK3C3   |
| Comparative Toxicogenomics Database | PIK3CA   |
| Comparative Toxicogenomics Database | PIK3CB   |
| Comparative Toxicogenomics Database | PIK3CG   |
| Comparative Toxicogenomics Database | PIK3R1   |
| Comparative Toxicogenomics Database | PIK3R3   |
| Comparative Toxicogenomics Database | PIM1     |
| Comparative Toxicogenomics Database | PIM3     |
| Comparative Toxicogenomics Database | PIMREG   |
| Comparative Toxicogenomics Database | PIN4     |
| Comparative Toxicogenomics Database | PINK1    |
| Comparative Toxicogenomics Database | PINX1    |
| Comparative Toxicogenomics Database | PIP4K2C  |
| Comparative Toxicogenomics Database | PIP4P2   |
| Comparative Toxicogenomics Database | PIWIL3   |
| Comparative Toxicogenomics Database | PKD2     |
| Comparative Toxicogenomics Database | PKIB     |
| Comparative Toxicogenomics Database | PKM      |
| Comparative Toxicogenomics Database | PKN2     |
| Comparative Toxicogenomics Database | PKP2     |

|                                     |         |
|-------------------------------------|---------|
| Comparative Toxicogenomics Database | PKP3    |
| Comparative Toxicogenomics Database | PLA2G2A |
| Comparative Toxicogenomics Database | PLA2G4A |
| Comparative Toxicogenomics Database | PLA2G6  |
| Comparative Toxicogenomics Database | PLAAT3  |
| Comparative Toxicogenomics Database | PLAT    |
| Comparative Toxicogenomics Database | PLAU    |
| Comparative Toxicogenomics Database | PLAUR   |
| Comparative Toxicogenomics Database | PLCB3   |
| Comparative Toxicogenomics Database | PLCD1   |
| Comparative Toxicogenomics Database | PLCG1   |
| Comparative Toxicogenomics Database | PLCG2   |
| Comparative Toxicogenomics Database | PLD1    |
| Comparative Toxicogenomics Database | PLEC    |
| Comparative Toxicogenomics Database | PLEK    |
| Comparative Toxicogenomics Database | PLEKHA5 |
| Comparative Toxicogenomics Database | PLEKHF1 |
| Comparative Toxicogenomics Database | PLEKHF2 |
| Comparative Toxicogenomics Database | PLIN2   |
| Comparative Toxicogenomics Database | PLIN4   |
| Comparative Toxicogenomics Database | PLK1    |
| Comparative Toxicogenomics Database | PLK4    |
| Comparative Toxicogenomics Database | PLN     |
| Comparative Toxicogenomics Database | PLOD2   |
| Comparative Toxicogenomics Database | PLOD3   |
| Comparative Toxicogenomics Database | PLP2    |
| Comparative Toxicogenomics Database | PLPP2   |
| Comparative Toxicogenomics Database | PLPPR2  |
| Comparative Toxicogenomics Database | PLSCR1  |
| Comparative Toxicogenomics Database | PLXDC1  |
| Comparative Toxicogenomics Database | PLXDC2  |
| Comparative Toxicogenomics Database | PLXNA2  |
| Comparative Toxicogenomics Database | PLXNB2  |
| Comparative Toxicogenomics Database | PMAIP1  |
| Comparative Toxicogenomics Database | PMEPA1  |
| Comparative Toxicogenomics Database | PML     |
| Comparative Toxicogenomics Database | PMP22   |
| Comparative Toxicogenomics Database | PMPCB   |
| Comparative Toxicogenomics Database | PMS1    |
| Comparative Toxicogenomics Database | PMVK    |
| Comparative Toxicogenomics Database | PNN     |
| Comparative Toxicogenomics Database | PNP     |
| Comparative Toxicogenomics Database | PNPLA2  |
| Comparative Toxicogenomics Database | PNPLA5  |
| Comparative Toxicogenomics Database | PNPO    |
| Comparative Toxicogenomics Database | PNRC1   |
| Comparative Toxicogenomics Database | POLA1   |
| Comparative Toxicogenomics Database | POLA2   |
| Comparative Toxicogenomics Database | POLD1   |
| Comparative Toxicogenomics Database | POLD2   |
| Comparative Toxicogenomics Database | POLD3   |
| Comparative Toxicogenomics Database | POLDIP2 |
| Comparative Toxicogenomics Database | POLDIP3 |
| Comparative Toxicogenomics Database | POLE2   |
| Comparative Toxicogenomics Database | POLI    |
| Comparative Toxicogenomics Database | POLR2B  |
| Comparative Toxicogenomics Database | POLR2D  |
| Comparative Toxicogenomics Database | POLR2E  |

|                                     |          |
|-------------------------------------|----------|
| Comparative Toxicogenomics Database | POLR2G   |
| Comparative Toxicogenomics Database | POLR2I   |
| Comparative Toxicogenomics Database | POLR2J   |
| Comparative Toxicogenomics Database | POLR2K   |
| Comparative Toxicogenomics Database | POMC     |
| Comparative Toxicogenomics Database | POMP     |
| Comparative Toxicogenomics Database | PON1     |
| Comparative Toxicogenomics Database | POR      |
| Comparative Toxicogenomics Database | POU1F1   |
| Comparative Toxicogenomics Database | POU5F1   |
| Comparative Toxicogenomics Database | PPAN     |
| Comparative Toxicogenomics Database | PPARA    |
| Comparative Toxicogenomics Database | PPARD    |
| Comparative Toxicogenomics Database | PPARG    |
| Comparative Toxicogenomics Database | PPARGC1A |
| Comparative Toxicogenomics Database | PPAT     |
| Comparative Toxicogenomics Database | PPBP     |
| Comparative Toxicogenomics Database | PPID     |
| Comparative Toxicogenomics Database | PPIF     |
| Comparative Toxicogenomics Database | PPL      |
| Comparative Toxicogenomics Database | PPM1A    |
| Comparative Toxicogenomics Database | PPM1E    |
| Comparative Toxicogenomics Database | PPP1CA   |
| Comparative Toxicogenomics Database | PPP1CB   |
| Comparative Toxicogenomics Database | PPP1R10  |
| Comparative Toxicogenomics Database | PPP1R12A |
| Comparative Toxicogenomics Database | PPP1R1B  |
| Comparative Toxicogenomics Database | PPP1R2   |
| Comparative Toxicogenomics Database | PPP1R3B  |
| Comparative Toxicogenomics Database | PPP1R3C  |
| Comparative Toxicogenomics Database | PPP2CA   |
| Comparative Toxicogenomics Database | PPP2CB   |
| Comparative Toxicogenomics Database | PPP2R5A  |
| Comparative Toxicogenomics Database | PPP2R5D  |
| Comparative Toxicogenomics Database | PPT1     |
| Comparative Toxicogenomics Database | PQBP1    |
| Comparative Toxicogenomics Database | PQN-54   |
| Comparative Toxicogenomics Database | PQN-76   |
| Comparative Toxicogenomics Database | PQN-78   |
| Comparative Toxicogenomics Database | PQN-91   |
| Comparative Toxicogenomics Database | PRDM16   |
| Comparative Toxicogenomics Database | PRDM2    |
| Comparative Toxicogenomics Database | PRDX1    |
| Comparative Toxicogenomics Database | PRDX2    |
| Comparative Toxicogenomics Database | PRDX6    |
| Comparative Toxicogenomics Database | PREB     |
| Comparative Toxicogenomics Database | PRF1     |
| Comparative Toxicogenomics Database | PRIM1    |
| Comparative Toxicogenomics Database | PRIM2    |
| Comparative Toxicogenomics Database | PRKAA1   |
| Comparative Toxicogenomics Database | PRKAA2   |
| Comparative Toxicogenomics Database | PRKAB2   |
| Comparative Toxicogenomics Database | PRKACA   |
| Comparative Toxicogenomics Database | PRKACB   |
| Comparative Toxicogenomics Database | PRKAG1   |
| Comparative Toxicogenomics Database | PRKAR1A  |
| Comparative Toxicogenomics Database | PRKAR2A  |
| Comparative Toxicogenomics Database | PRKAR2B  |

|                                     |           |
|-------------------------------------|-----------|
| Comparative Toxicogenomics Database | PRKCA     |
| Comparative Toxicogenomics Database | PRKCB     |
| Comparative Toxicogenomics Database | PRKCD     |
| Comparative Toxicogenomics Database | PRKCG     |
| Comparative Toxicogenomics Database | PRKCI     |
| Comparative Toxicogenomics Database | PRKCQ     |
| Comparative Toxicogenomics Database | PRKD1     |
| Comparative Toxicogenomics Database | PRKG1     |
| Comparative Toxicogenomics Database | PRKN      |
| Comparative Toxicogenomics Database | PRKX      |
| Comparative Toxicogenomics Database | PRL       |
| Comparative Toxicogenomics Database | PRMT1     |
| Comparative Toxicogenomics Database | PRMT6     |
| Comparative Toxicogenomics Database | PRODH2    |
| Comparative Toxicogenomics Database | PROM2     |
| Comparative Toxicogenomics Database | PRORSD1   |
| Comparative Toxicogenomics Database | PROS1     |
| Comparative Toxicogenomics Database | PRPF3     |
| Comparative Toxicogenomics Database | PRPF4     |
| Comparative Toxicogenomics Database | PRPF4B    |
| Comparative Toxicogenomics Database | PRPF6     |
| Comparative Toxicogenomics Database | PRPF8     |
| Comparative Toxicogenomics Database | PRPS2     |
| Comparative Toxicogenomics Database | PRPSAP1   |
| Comparative Toxicogenomics Database | PRRC2A    |
| Comparative Toxicogenomics Database | PRSS16    |
| Comparative Toxicogenomics Database | PRSS23    |
| Comparative Toxicogenomics Database | PRSS8     |
| Comparative Toxicogenomics Database | PRX2540-1 |
| Comparative Toxicogenomics Database | PRX2540-2 |
| Comparative Toxicogenomics Database | PRX6005   |
| Comparative Toxicogenomics Database | PRY       |
| Comparative Toxicogenomics Database | PSAT1     |
| Comparative Toxicogenomics Database | PSEN2     |
| Comparative Toxicogenomics Database | PSIP1     |
| Comparative Toxicogenomics Database | PSMA5     |
| Comparative Toxicogenomics Database | PSMB10    |
| Comparative Toxicogenomics Database | PSMB5     |
| Comparative Toxicogenomics Database | PSMB7     |
| Comparative Toxicogenomics Database | PSMB8     |
| Comparative Toxicogenomics Database | PSMC3     |
| Comparative Toxicogenomics Database | PSMC3IP   |
| Comparative Toxicogenomics Database | PSMC6     |
| Comparative Toxicogenomics Database | PSMD10    |
| Comparative Toxicogenomics Database | PSMD12    |
| Comparative Toxicogenomics Database | PSMD14    |
| Comparative Toxicogenomics Database | PSME4     |
| Comparative Toxicogenomics Database | PSMG3     |
| Comparative Toxicogenomics Database | PSRC1     |
| Comparative Toxicogenomics Database | PTCH1     |
| Comparative Toxicogenomics Database | PTCHD4    |
| Comparative Toxicogenomics Database | PTEN      |
| Comparative Toxicogenomics Database | PTGDS     |
| Comparative Toxicogenomics Database | PTGER1    |
| Comparative Toxicogenomics Database | PTGER4    |
| Comparative Toxicogenomics Database | PTGES     |
| Comparative Toxicogenomics Database | PTGES2    |
| Comparative Toxicogenomics Database | PTGES3    |

|                                     |         |
|-------------------------------------|---------|
| Comparative Toxicogenomics Database | PTGS1   |
| Comparative Toxicogenomics Database | PTGS2   |
| Comparative Toxicogenomics Database | PTK2    |
| Comparative Toxicogenomics Database | PTK2B   |
| Comparative Toxicogenomics Database | PTMA    |
| Comparative Toxicogenomics Database | PTPMT1  |
| Comparative Toxicogenomics Database | PTPN1   |
| Comparative Toxicogenomics Database | PTPN11  |
| Comparative Toxicogenomics Database | PTPN12  |
| Comparative Toxicogenomics Database | PTPN21  |
| Comparative Toxicogenomics Database | PTPRA   |
| Comparative Toxicogenomics Database | PTPRE   |
| Comparative Toxicogenomics Database | PTPRF   |
| Comparative Toxicogenomics Database | PTPRG   |
| Comparative Toxicogenomics Database | PTPRN2  |
| Comparative Toxicogenomics Database | PTPRR   |
| Comparative Toxicogenomics Database | PTRH2   |
| Comparative Toxicogenomics Database | PTTG1   |
| Comparative Toxicogenomics Database | PTX3    |
| Comparative Toxicogenomics Database | PUF60   |
| Comparative Toxicogenomics Database | PUS1    |
| Comparative Toxicogenomics Database | PWP1    |
| Comparative Toxicogenomics Database | PWP2    |
| Comparative Toxicogenomics Database | PXDN    |
| Comparative Toxicogenomics Database | PXMP4   |
| Comparative Toxicogenomics Database | PXN     |
| Comparative Toxicogenomics Database | PYCARD  |
| Comparative Toxicogenomics Database | PYCR2   |
| Comparative Toxicogenomics Database | PYGL    |
| Comparative Toxicogenomics Database | PYGO2   |
| Comparative Toxicogenomics Database | PYROXD2 |
| Comparative Toxicogenomics Database | QARS    |
| Comparative Toxicogenomics Database | QK      |
| Comparative Toxicogenomics Database | QPRT    |
| Comparative Toxicogenomics Database | RAB10   |
| Comparative Toxicogenomics Database | RAB11A  |
| Comparative Toxicogenomics Database | RAB11B  |
| Comparative Toxicogenomics Database | RAB14   |
| Comparative Toxicogenomics Database | RAB18   |
| Comparative Toxicogenomics Database | RAB1A   |
| Comparative Toxicogenomics Database | RAB20   |
| Comparative Toxicogenomics Database | RAB21   |
| Comparative Toxicogenomics Database | RAB23   |
| Comparative Toxicogenomics Database | RAB27B  |
| Comparative Toxicogenomics Database | RAB2A   |
| Comparative Toxicogenomics Database | RAB2B   |
| Comparative Toxicogenomics Database | RAB30   |
| Comparative Toxicogenomics Database | RAB31   |
| Comparative Toxicogenomics Database | RAB32   |
| Comparative Toxicogenomics Database | RAB33B  |
| Comparative Toxicogenomics Database | RAB38   |
| Comparative Toxicogenomics Database | RAB3D   |
| Comparative Toxicogenomics Database | RAB43   |
| Comparative Toxicogenomics Database | RAB4B   |
| Comparative Toxicogenomics Database | RAB5B   |
| Comparative Toxicogenomics Database | RAB5C   |
| Comparative Toxicogenomics Database | RAB6A   |
| Comparative Toxicogenomics Database | RAB7    |

Comparative Toxicogenomics Database RAB7A  
Comparative Toxicogenomics Database RAB8A  
Comparative Toxicogenomics Database RAB8B  
Comparative Toxicogenomics Database RAB9  
Comparative Toxicogenomics Database RABGAP1L  
Comparative Toxicogenomics Database RAC1  
Comparative Toxicogenomics Database RAC2  
Comparative Toxicogenomics Database RAC3  
Comparative Toxicogenomics Database RACGAP1  
Comparative Toxicogenomics Database RAD18  
Comparative Toxicogenomics Database RAD23B  
Comparative Toxicogenomics Database RAD50  
Comparative Toxicogenomics Database RAD51  
Comparative Toxicogenomics Database RAD51AP1  
Comparative Toxicogenomics Database RAD51C  
Comparative Toxicogenomics Database RAD54B  
Comparative Toxicogenomics Database RAD54L  
Comparative Toxicogenomics Database RAD9B  
Comparative Toxicogenomics Database RAET1E  
Comparative Toxicogenomics Database RAF1  
Comparative Toxicogenomics Database RAN  
Comparative Toxicogenomics Database RANBP2  
Comparative Toxicogenomics Database RANBP3  
Comparative Toxicogenomics Database RANGAP1  
Comparative Toxicogenomics Database RAP1A  
Comparative Toxicogenomics Database RAP1B  
Comparative Toxicogenomics Database RAP2A  
Comparative Toxicogenomics Database RAPH1  
Comparative Toxicogenomics Database RARA  
Comparative Toxicogenomics Database RARRES1  
Comparative Toxicogenomics Database RASA2  
Comparative Toxicogenomics Database RASD1  
Comparative Toxicogenomics Database RASGRF1  
Comparative Toxicogenomics Database RASGRP1  
Comparative Toxicogenomics Database RASGRP2  
Comparative Toxicogenomics Database RASSF4  
Comparative Toxicogenomics Database RB1  
Comparative Toxicogenomics Database RB1CC1  
Comparative Toxicogenomics Database RBBP8  
Comparative Toxicogenomics Database RBM13  
Comparative Toxicogenomics Database RBM15  
Comparative Toxicogenomics Database RBM19  
Comparative Toxicogenomics Database RBM22  
Comparative Toxicogenomics Database RBM24  
Comparative Toxicogenomics Database RBM25  
Comparative Toxicogenomics Database RBM28  
Comparative Toxicogenomics Database RBM3  
Comparative Toxicogenomics Database RBM33  
Comparative Toxicogenomics Database RBM34  
Comparative Toxicogenomics Database RBM39  
Comparative Toxicogenomics Database RBM5  
Comparative Toxicogenomics Database RBM8A  
Comparative Toxicogenomics Database RBMS1  
Comparative Toxicogenomics Database RBP4  
Comparative Toxicogenomics Database RCAN1  
Comparative Toxicogenomics Database RCBTB1  
Comparative Toxicogenomics Database RCCD1  
Comparative Toxicogenomics Database RCOR1



|                                     |          |
|-------------------------------------|----------|
| Comparative Toxicogenomics Database | RDH10    |
| Comparative Toxicogenomics Database | RDH11    |
| Comparative Toxicogenomics Database | RDH13    |
| Comparative Toxicogenomics Database | RDH14    |
| Comparative Toxicogenomics Database | RDH2     |
| Comparative Toxicogenomics Database | RECK     |
| Comparative Toxicogenomics Database | RECQL4   |
| Comparative Toxicogenomics Database | REEP4    |
| Comparative Toxicogenomics Database | REEP5    |
| Comparative Toxicogenomics Database | REG3A    |
| Comparative Toxicogenomics Database | REL      |
| Comparative Toxicogenomics Database | RELA     |
| Comparative Toxicogenomics Database | RELB     |
| Comparative Toxicogenomics Database | RELN     |
| Comparative Toxicogenomics Database | REPS1    |
| Comparative Toxicogenomics Database | RERG     |
| Comparative Toxicogenomics Database | REST     |
| Comparative Toxicogenomics Database | RET      |
| Comparative Toxicogenomics Database | RETN     |
| Comparative Toxicogenomics Database | RFC2     |
| Comparative Toxicogenomics Database | RFC3     |
| Comparative Toxicogenomics Database | RFC4     |
| Comparative Toxicogenomics Database | RFC5     |
| Comparative Toxicogenomics Database | RFTN1    |
| Comparative Toxicogenomics Database | RFX2     |
| Comparative Toxicogenomics Database | RGN      |
| Comparative Toxicogenomics Database | RGS13    |
| Comparative Toxicogenomics Database | RGS4     |
| Comparative Toxicogenomics Database | RGS5     |
| Comparative Toxicogenomics Database | RHBDF1   |
| Comparative Toxicogenomics Database | RHNO1    |
| Comparative Toxicogenomics Database | RHOA     |
| Comparative Toxicogenomics Database | RHOBTB1  |
| Comparative Toxicogenomics Database | RHOC     |
| Comparative Toxicogenomics Database | RHOJ     |
| Comparative Toxicogenomics Database | RHOQ     |
| Comparative Toxicogenomics Database | RHOT1    |
| Comparative Toxicogenomics Database | RHOU     |
| Comparative Toxicogenomics Database | RIBC2    |
| Comparative Toxicogenomics Database | RIOK3    |
| Comparative Toxicogenomics Database | RIPK1    |
| Comparative Toxicogenomics Database | RIPK3    |
| Comparative Toxicogenomics Database | RIPOR2   |
| Comparative Toxicogenomics Database | RMI1     |
| Comparative Toxicogenomics Database | RMI2     |
| Comparative Toxicogenomics Database | RNASEH2A |
| Comparative Toxicogenomics Database | RNF113A  |
| Comparative Toxicogenomics Database | RNF128   |
| Comparative Toxicogenomics Database | RNF144A  |
| Comparative Toxicogenomics Database | RNF185   |
| Comparative Toxicogenomics Database | RNF26    |
| Comparative Toxicogenomics Database | RNF4     |
| Comparative Toxicogenomics Database | RNF6     |
| Comparative Toxicogenomics Database | RNFT2    |
| Comparative Toxicogenomics Database | RNH1     |
| Comparative Toxicogenomics Database | RNPC3    |
| Comparative Toxicogenomics Database | RNU11    |
| Comparative Toxicogenomics Database | RNU6ATAC |

|                                     |          |
|-------------------------------------|----------|
| Comparative Toxicogenomics Database | ROCK1    |
| Comparative Toxicogenomics Database | ROCK2    |
| Comparative Toxicogenomics Database | RPA1     |
| Comparative Toxicogenomics Database | RPA2     |
| Comparative Toxicogenomics Database | RPA3     |
| Comparative Toxicogenomics Database | RPF2     |
| Comparative Toxicogenomics Database | RPL17    |
| Comparative Toxicogenomics Database | RPL19    |
| Comparative Toxicogenomics Database | RPL3     |
| Comparative Toxicogenomics Database | RPL32    |
| Comparative Toxicogenomics Database | RPL39    |
| Comparative Toxicogenomics Database | RPL6     |
| Comparative Toxicogenomics Database | RPLP2    |
| Comparative Toxicogenomics Database | RPRD1B   |
| Comparative Toxicogenomics Database | RPRD2    |
| Comparative Toxicogenomics Database | RPRM     |
| Comparative Toxicogenomics Database | RPS19    |
| Comparative Toxicogenomics Database | RPS19BP1 |
| Comparative Toxicogenomics Database | RPS21    |
| Comparative Toxicogenomics Database | RPS3A    |
| Comparative Toxicogenomics Database | RPS6     |
| Comparative Toxicogenomics Database | RPS6KA1  |
| Comparative Toxicogenomics Database | RPS6KB1  |
| Comparative Toxicogenomics Database | RPTOR    |
| Comparative Toxicogenomics Database | RRAGA    |
| Comparative Toxicogenomics Database | RRBP1    |
| Comparative Toxicogenomics Database | RRM1     |
| Comparative Toxicogenomics Database | RRM2     |
| Comparative Toxicogenomics Database | RRM2B    |
| Comparative Toxicogenomics Database | RRP1     |
| Comparative Toxicogenomics Database | RRP1B    |
| Comparative Toxicogenomics Database | RSAD2    |
| Comparative Toxicogenomics Database | RSBN1    |
| Comparative Toxicogenomics Database | RSBN1L   |
| Comparative Toxicogenomics Database | RSPRY1   |
| Comparative Toxicogenomics Database | RSRC1    |
| Comparative Toxicogenomics Database | RT1-DMA  |
| Comparative Toxicogenomics Database | RT1-DMB  |
| Comparative Toxicogenomics Database | RTCA     |
| Comparative Toxicogenomics Database | RTL10    |
| Comparative Toxicogenomics Database | RTN3     |
| Comparative Toxicogenomics Database | RTN4     |
| Comparative Toxicogenomics Database | RUNDC3A  |
| Comparative Toxicogenomics Database | RUNX2    |
| Comparative Toxicogenomics Database | RXRA     |
| Comparative Toxicogenomics Database | RYR2     |
| Comparative Toxicogenomics Database | S100A1   |
| Comparative Toxicogenomics Database | S100A16  |
| Comparative Toxicogenomics Database | S100A4   |
| Comparative Toxicogenomics Database | S100A6   |
| Comparative Toxicogenomics Database | S100A8   |
| Comparative Toxicogenomics Database | S100A9   |
| Comparative Toxicogenomics Database | S100B    |
| Comparative Toxicogenomics Database | S100P    |
| Comparative Toxicogenomics Database | S1PR3    |
| Comparative Toxicogenomics Database | SAA      |
| Comparative Toxicogenomics Database | SAA1     |
| Comparative Toxicogenomics Database | SAA2     |

Comparative Toxicogenomics Database SAA3  
Comparative Toxicogenomics Database SAC3D1  
Comparative Toxicogenomics Database SACS  
Comparative Toxicogenomics Database SALL4  
Comparative Toxicogenomics Database SAMD4A  
Comparative Toxicogenomics Database SAMD5  
Comparative Toxicogenomics Database SAR1A  
Comparative Toxicogenomics Database SARM1  
Comparative Toxicogenomics Database SARNP  
Comparative Toxicogenomics Database SARS1  
Comparative Toxicogenomics Database SAT1  
Comparative Toxicogenomics Database SBF1  
Comparative Toxicogenomics Database SBF2  
Comparative Toxicogenomics Database SC5D  
Comparative Toxicogenomics Database SCAF1  
Comparative Toxicogenomics Database SCAF11  
Comparative Toxicogenomics Database SCAMP5  
Comparative Toxicogenomics Database SCAND2P  
Comparative Toxicogenomics Database SCAP  
Comparative Toxicogenomics Database SCARA5  
Comparative Toxicogenomics Database SCARB1  
Comparative Toxicogenomics Database SCARNA12  
Comparative Toxicogenomics Database SCD  
Comparative Toxicogenomics Database SCD1  
Comparative Toxicogenomics Database SCD2  
Comparative Toxicogenomics Database SCML2  
Comparative Toxicogenomics Database SCP2  
Comparative Toxicogenomics Database SCPEP1  
Comparative Toxicogenomics Database SCX  
Comparative Toxicogenomics Database SDC2  
Comparative Toxicogenomics Database SDF2L1  
Comparative Toxicogenomics Database SDHA  
Comparative Toxicogenomics Database SDHB  
Comparative Toxicogenomics Database SDHD  
Comparative Toxicogenomics Database SDR39U1  
Comparative Toxicogenomics Database SDS  
Comparative Toxicogenomics Database SEC11A  
Comparative Toxicogenomics Database SEC11C  
Comparative Toxicogenomics Database SEC14L1  
Comparative Toxicogenomics Database SEC14L3  
Comparative Toxicogenomics Database SEC22B  
Comparative Toxicogenomics Database SEC31A  
Comparative Toxicogenomics Database SEC61G  
Comparative Toxicogenomics Database SEL1L  
Comparative Toxicogenomics Database SELE  
Comparative Toxicogenomics Database SELENBP1  
Comparative Toxicogenomics Database SELENOP  
Comparative Toxicogenomics Database SELENOT  
Comparative Toxicogenomics Database SELL  
Comparative Toxicogenomics Database SELP  
Comparative Toxicogenomics Database SEMA3B  
Comparative Toxicogenomics Database SENP7  
Comparative Toxicogenomics Database SEPHS2  
Comparative Toxicogenomics Database SEPTIN11  
Comparative Toxicogenomics Database SERHL  
Comparative Toxicogenomics Database SERPINA1  
Comparative Toxicogenomics Database SERPINA12  
Comparative Toxicogenomics Database SERPINA1E

Comparative Toxicogenomics Database SERPINA3C  
Comparative Toxicogenomics Database SERPINA3K  
Comparative Toxicogenomics Database SERPINA6  
Comparative Toxicogenomics Database SERPINA7  
Comparative Toxicogenomics Database SERPINB1A  
Comparative Toxicogenomics Database SERPINB2  
Comparative Toxicogenomics Database SERPINB5  
Comparative Toxicogenomics Database SERPINC1  
Comparative Toxicogenomics Database SERPINE1  
Comparative Toxicogenomics Database SERPINF1  
Comparative Toxicogenomics Database SERPINH1  
Comparative Toxicogenomics Database SESN1  
Comparative Toxicogenomics Database SESN2  
Comparative Toxicogenomics Database SETMAR  
Comparative Toxicogenomics Database SF1  
Comparative Toxicogenomics Database SF3A1  
Comparative Toxicogenomics Database SF3B1  
Comparative Toxicogenomics Database SF3B3  
Comparative Toxicogenomics Database SF3B5  
Comparative Toxicogenomics Database SF3B6  
Comparative Toxicogenomics Database SFPQ  
Comparative Toxicogenomics Database SFR1  
Comparative Toxicogenomics Database SFRP1  
Comparative Toxicogenomics Database SFTPB  
Comparative Toxicogenomics Database SFXN2  
Comparative Toxicogenomics Database SGCB  
Comparative Toxicogenomics Database SGCG  
Comparative Toxicogenomics Database SGK3  
Comparative Toxicogenomics Database SGO1  
Comparative Toxicogenomics Database SGO2  
Comparative Toxicogenomics Database SH3BGRL  
Comparative Toxicogenomics Database SH3BGRL2  
Comparative Toxicogenomics Database SH3BP4  
Comparative Toxicogenomics Database SH3GLB1  
Comparative Toxicogenomics Database SH3PXD2B  
Comparative Toxicogenomics Database SHB  
Comparative Toxicogenomics Database SHC1  
Comparative Toxicogenomics Database SHCBP1  
Comparative Toxicogenomics Database SHH  
Comparative Toxicogenomics Database SHLD2  
Comparative Toxicogenomics Database SHMT1  
Comparative Toxicogenomics Database SHMT2  
Comparative Toxicogenomics Database SIAH1  
Comparative Toxicogenomics Database SIAH2  
Comparative Toxicogenomics Database SIGMAR1  
Comparative Toxicogenomics Database SIL1  
Comparative Toxicogenomics Database SIR-2.1  
Comparative Toxicogenomics Database SIRT1  
Comparative Toxicogenomics Database SIRT2  
Comparative Toxicogenomics Database SIRT3  
Comparative Toxicogenomics Database SIRT4  
Comparative Toxicogenomics Database SIRT5  
Comparative Toxicogenomics Database SIRT6  
Comparative Toxicogenomics Database SKA1  
Comparative Toxicogenomics Database SKA2  
Comparative Toxicogenomics Database SKA3  
Comparative Toxicogenomics Database SKAP2  
Comparative Toxicogenomics Database SKP2

|                                     |          |
|-------------------------------------|----------|
| Comparative Toxicogenomics Database | SLA      |
| Comparative Toxicogenomics Database | SLBP     |
| Comparative Toxicogenomics Database | SLC10A2  |
| Comparative Toxicogenomics Database | SLC12A4  |
| Comparative Toxicogenomics Database | SLC12A7  |
| Comparative Toxicogenomics Database | SLC15A1  |
| Comparative Toxicogenomics Database | SLC15A3  |
| Comparative Toxicogenomics Database | SLC16A1  |
| Comparative Toxicogenomics Database | SLC16A12 |
| Comparative Toxicogenomics Database | SLC16A7  |
| Comparative Toxicogenomics Database | SLC17A5  |
| Comparative Toxicogenomics Database | SLC1A1   |
| Comparative Toxicogenomics Database | SLC1A2   |
| Comparative Toxicogenomics Database | SLC1A3   |
| Comparative Toxicogenomics Database | SLC1A4   |
| Comparative Toxicogenomics Database | SLC1A5   |
| Comparative Toxicogenomics Database | SLC20A1  |
| Comparative Toxicogenomics Database | SLC22A1  |
| Comparative Toxicogenomics Database | SLC22A6  |
| Comparative Toxicogenomics Database | SLC22A7  |
| Comparative Toxicogenomics Database | SLC22A8  |
| Comparative Toxicogenomics Database | SLC24A5  |
| Comparative Toxicogenomics Database | SLC25A10 |
| Comparative Toxicogenomics Database | SLC25A11 |
| Comparative Toxicogenomics Database | SLC25A19 |
| Comparative Toxicogenomics Database | SLC25A22 |
| Comparative Toxicogenomics Database | SLC25A37 |
| Comparative Toxicogenomics Database | SLC25A4  |
| Comparative Toxicogenomics Database | SLC25A40 |
| Comparative Toxicogenomics Database | SLC25A5  |
| Comparative Toxicogenomics Database | SLC26A11 |
| Comparative Toxicogenomics Database | SLC26A2  |
| Comparative Toxicogenomics Database | SLC27A2  |
| Comparative Toxicogenomics Database | SLC27A3  |
| Comparative Toxicogenomics Database | SLC27A4  |
| Comparative Toxicogenomics Database | SLC2A1   |
| Comparative Toxicogenomics Database | SLC2A2   |
| Comparative Toxicogenomics Database | SLC2A4   |
| Comparative Toxicogenomics Database | SLC2A9   |
| Comparative Toxicogenomics Database | SLC30A6  |
| Comparative Toxicogenomics Database | SLC31A1  |
| Comparative Toxicogenomics Database | SLC39A8  |
| Comparative Toxicogenomics Database | SLC40A1  |
| Comparative Toxicogenomics Database | SLC41A2  |
| Comparative Toxicogenomics Database | SLC41A3  |
| Comparative Toxicogenomics Database | SLC45A2  |
| Comparative Toxicogenomics Database | SLC4A1   |
| Comparative Toxicogenomics Database | SLC4A4   |
| Comparative Toxicogenomics Database | SLC5A1   |
| Comparative Toxicogenomics Database | SLC5A5   |
| Comparative Toxicogenomics Database | SLC6A14  |
| Comparative Toxicogenomics Database | SLC6A6   |
| Comparative Toxicogenomics Database | SLC7A2   |
| Comparative Toxicogenomics Database | SLC7A5   |
| Comparative Toxicogenomics Database | SLC7A6   |
| Comparative Toxicogenomics Database | SLC7A7   |
| Comparative Toxicogenomics Database | SLC8A1   |
| Comparative Toxicogenomics Database | SLC9A1   |

Comparative Toxicogenomics Database SLC9A3  
Comparative Toxicogenomics Database SLC9A3R2  
Comparative Toxicogenomics Database SLCO1A1  
Comparative Toxicogenomics Database SLCO1A4  
Comparative Toxicogenomics Database SLCO2A1  
Comparative Toxicogenomics Database SLF1  
Comparative Toxicogenomics Database SLPR  
Comparative Toxicogenomics Database SMAD1  
Comparative Toxicogenomics Database SMAD2  
Comparative Toxicogenomics Database SMAD3  
Comparative Toxicogenomics Database SMAD4  
Comparative Toxicogenomics Database SMAD5  
Comparative Toxicogenomics Database SMAD7  
Comparative Toxicogenomics Database SMAD9  
Comparative Toxicogenomics Database SMARCA4  
Comparative Toxicogenomics Database SMARCA5  
Comparative Toxicogenomics Database SMARCB1  
Comparative Toxicogenomics Database SMARCE1  
Comparative Toxicogenomics Database SMC1A  
Comparative Toxicogenomics Database SMC2  
Comparative Toxicogenomics Database SMC3  
Comparative Toxicogenomics Database SMC4  
Comparative Toxicogenomics Database SMC6  
Comparative Toxicogenomics Database SMN2  
Comparative Toxicogenomics Database SMNDC1  
Comparative Toxicogenomics Database SMO  
Comparative Toxicogenomics Database SMTN  
Comparative Toxicogenomics Database SMU1  
Comparative Toxicogenomics Database SNAI1  
Comparative Toxicogenomics Database SNAI2  
Comparative Toxicogenomics Database SNAP23  
Comparative Toxicogenomics Database SNCA  
Comparative Toxicogenomics Database SNHG32  
Comparative Toxicogenomics Database SNHG7  
Comparative Toxicogenomics Database SNHG8  
Comparative Toxicogenomics Database SNORA20  
Comparative Toxicogenomics Database SNORA54  
Comparative Toxicogenomics Database SNORA64  
Comparative Toxicogenomics Database SNORA72  
Comparative Toxicogenomics Database NORD103C  
Comparative Toxicogenomics Database 3NORD14C  
Comparative Toxicogenomics Database 3NORD15A  
Comparative Toxicogenomics Database SNORD22  
Comparative Toxicogenomics Database SNORD46  
Comparative Toxicogenomics Database SNORD56  
Comparative Toxicogenomics Database 3NORD59A  
Comparative Toxicogenomics Database SNORD61  
Comparative Toxicogenomics Database SNORD87  
Comparative Toxicogenomics Database 3NRNP200  
Comparative Toxicogenomics Database SNRNP25  
Comparative Toxicogenomics Database SNRNP48  
Comparative Toxicogenomics Database SNRPA  
Comparative Toxicogenomics Database SNRPA1  
Comparative Toxicogenomics Database SNRPB2  
Comparative Toxicogenomics Database SNRPD2  
Comparative Toxicogenomics Database SNRPD3  
Comparative Toxicogenomics Database SNRPE  
Comparative Toxicogenomics Database SNX10

|                                     |         |
|-------------------------------------|---------|
| Comparative Toxicogenomics Database | SNX18   |
| Comparative Toxicogenomics Database | SNX24   |
| Comparative Toxicogenomics Database | SNX3    |
| Comparative Toxicogenomics Database | SNX4    |
| Comparative Toxicogenomics Database | SNX5    |
| Comparative Toxicogenomics Database | SOCS1   |
| Comparative Toxicogenomics Database | SOCS2   |
| Comparative Toxicogenomics Database | SOCS3   |
| Comparative Toxicogenomics Database | SOD1    |
| Comparative Toxicogenomics Database | SOD2    |
| Comparative Toxicogenomics Database | SOD3    |
| Comparative Toxicogenomics Database | SOD-3   |
| Comparative Toxicogenomics Database | SOS1    |
| Comparative Toxicogenomics Database | SOX13   |
| Comparative Toxicogenomics Database | SOX17   |
| Comparative Toxicogenomics Database | SOX2    |
| Comparative Toxicogenomics Database | SOX3    |
| Comparative Toxicogenomics Database | SOX4    |
| Comparative Toxicogenomics Database | SOX9    |
| Comparative Toxicogenomics Database | SP1     |
| Comparative Toxicogenomics Database | SP100   |
| Comparative Toxicogenomics Database | SP3     |
| Comparative Toxicogenomics Database | SP4     |
| Comparative Toxicogenomics Database | SP7     |
| Comparative Toxicogenomics Database | SPAG1   |
| Comparative Toxicogenomics Database | SPAG5   |
| Comparative Toxicogenomics Database | SPANXD  |
| Comparative Toxicogenomics Database | SPARC   |
| Comparative Toxicogenomics Database | SPATA20 |
| Comparative Toxicogenomics Database | SPATA7  |
| Comparative Toxicogenomics Database | SPC24   |
| Comparative Toxicogenomics Database | SPC25   |
| Comparative Toxicogenomics Database | SPDEF   |
| Comparative Toxicogenomics Database | SPDL1   |
| Comparative Toxicogenomics Database | SPEN    |
| Comparative Toxicogenomics Database | SPHK1   |
| Comparative Toxicogenomics Database | SPI1    |
| Comparative Toxicogenomics Database | SPIN4   |
| Comparative Toxicogenomics Database | SPP1    |
| Comparative Toxicogenomics Database | SPP2    |
| Comparative Toxicogenomics Database | SPRY1   |
| Comparative Toxicogenomics Database | SPRYD4  |
| Comparative Toxicogenomics Database | SPSB3   |
| Comparative Toxicogenomics Database | SPSB4   |
| Comparative Toxicogenomics Database | SPTAN1  |
| Comparative Toxicogenomics Database | SPTBN1  |
| Comparative Toxicogenomics Database | SQLE    |
| Comparative Toxicogenomics Database | SQOR    |
| Comparative Toxicogenomics Database | SQSTM1  |
| Comparative Toxicogenomics Database | SRC     |
| Comparative Toxicogenomics Database | SRD5A2  |
| Comparative Toxicogenomics Database | SRD5A3  |
| Comparative Toxicogenomics Database | SREBF1  |
| Comparative Toxicogenomics Database | SREBF2  |
| Comparative Toxicogenomics Database | SRF     |
| Comparative Toxicogenomics Database | SRGAP3  |
| Comparative Toxicogenomics Database | SRI     |
| Comparative Toxicogenomics Database | SRP19   |

|                                     |          |
|-------------------------------------|----------|
| Comparative Toxicogenomics Database | SRP54A   |
| Comparative Toxicogenomics Database | SRP68    |
| Comparative Toxicogenomics Database | SRP72    |
| Comparative Toxicogenomics Database | SRPK1    |
| Comparative Toxicogenomics Database | SRPRB    |
| Comparative Toxicogenomics Database | SRR      |
| Comparative Toxicogenomics Database | SRRM2    |
| Comparative Toxicogenomics Database | SRRT     |
| Comparative Toxicogenomics Database | SRSF1    |
| Comparative Toxicogenomics Database | SRSF10   |
| Comparative Toxicogenomics Database | SRSF11   |
| Comparative Toxicogenomics Database | SRSF5    |
| Comparative Toxicogenomics Database | SSH1     |
| Comparative Toxicogenomics Database | SSH2     |
| Comparative Toxicogenomics Database | SSRP1    |
| Comparative Toxicogenomics Database | STR5-AS1 |
| Comparative Toxicogenomics Database | SSX2IP   |
| Comparative Toxicogenomics Database | ST13     |
| Comparative Toxicogenomics Database | ST3GAL1  |
| Comparative Toxicogenomics Database | ST3GAL3  |
| Comparative Toxicogenomics Database | ST8SIA4  |
| Comparative Toxicogenomics Database | STAMBPL1 |
| Comparative Toxicogenomics Database | STAR     |
| Comparative Toxicogenomics Database | STARD3   |
| Comparative Toxicogenomics Database | STARD4   |
| Comparative Toxicogenomics Database | STAT1    |
| Comparative Toxicogenomics Database | STAT3    |
| Comparative Toxicogenomics Database | STAT4    |
| Comparative Toxicogenomics Database | STAT5A   |
| Comparative Toxicogenomics Database | STAT5B   |
| Comparative Toxicogenomics Database | STAT6    |
| Comparative Toxicogenomics Database | STBD1    |
| Comparative Toxicogenomics Database | STEAP4   |
| Comparative Toxicogenomics Database | STIL     |
| Comparative Toxicogenomics Database | STIP1    |
| Comparative Toxicogenomics Database | STK11    |
| Comparative Toxicogenomics Database | STK17A   |
| Comparative Toxicogenomics Database | STK17B   |
| Comparative Toxicogenomics Database | STK38L   |
| Comparative Toxicogenomics Database | STK39    |
| Comparative Toxicogenomics Database | STMN1    |
| Comparative Toxicogenomics Database | STOM     |
| Comparative Toxicogenomics Database | STOML2   |
| Comparative Toxicogenomics Database | STRBP    |
| Comparative Toxicogenomics Database | STRIP1   |
| Comparative Toxicogenomics Database | STRN3    |
| Comparative Toxicogenomics Database | STT3A    |
| Comparative Toxicogenomics Database | STT3B    |
| Comparative Toxicogenomics Database | STX4     |
| Comparative Toxicogenomics Database | STX8     |
| Comparative Toxicogenomics Database | SUCLA2   |
| Comparative Toxicogenomics Database | SUCLG1   |
| Comparative Toxicogenomics Database | SUCLG2   |
| Comparative Toxicogenomics Database | SULF1    |
| Comparative Toxicogenomics Database | SULF2    |
| Comparative Toxicogenomics Database | SULT1A1  |
| Comparative Toxicogenomics Database | SULT1A2  |
| Comparative Toxicogenomics Database | SULT1A3  |



|                                     |             |
|-------------------------------------|-------------|
| Comparative Toxicogenomics Database | SULT1C2     |
| Comparative Toxicogenomics Database | SULT1E1     |
| Comparative Toxicogenomics Database | SULT2A8     |
| Comparative Toxicogenomics Database | SULT4A1     |
| Comparative Toxicogenomics Database | SUMO1       |
| Comparative Toxicogenomics Database | SURF1       |
| Comparative Toxicogenomics Database | SURF4       |
| Comparative Toxicogenomics Database | SUSD1       |
| Comparative Toxicogenomics Database | SUV39H1     |
| Comparative Toxicogenomics Database | SUV39H2     |
| Comparative Toxicogenomics Database | SUZ12       |
| Comparative Toxicogenomics Database | SYAP1       |
| Comparative Toxicogenomics Database | SYBU        |
| Comparative Toxicogenomics Database | SYK         |
| Comparative Toxicogenomics Database | SYNE1       |
| Comparative Toxicogenomics Database | SYNE3       |
| Comparative Toxicogenomics Database | SYNE4       |
| Comparative Toxicogenomics Database | SYNGR3      |
| Comparative Toxicogenomics Database | JJ2BP-COX16 |
| Comparative Toxicogenomics Database | SYP         |
| Comparative Toxicogenomics Database | SYTL2       |
| Comparative Toxicogenomics Database | SYTL4       |
| Comparative Toxicogenomics Database | SYTL5       |
| Comparative Toxicogenomics Database | SYVN1       |
| Comparative Toxicogenomics Database | T           |
| Comparative Toxicogenomics Database | TACC3       |
| Comparative Toxicogenomics Database | TACO1       |
| Comparative Toxicogenomics Database | TAF1        |
| Comparative Toxicogenomics Database | TAF15       |
| Comparative Toxicogenomics Database | TAF5        |
| Comparative Toxicogenomics Database | TAGLN       |
| Comparative Toxicogenomics Database | TAGLN2      |
| Comparative Toxicogenomics Database | TAK1        |
| Comparative Toxicogenomics Database | TALDO1      |
| Comparative Toxicogenomics Database | TAP1        |
| Comparative Toxicogenomics Database | TAP2        |
| Comparative Toxicogenomics Database | TAPBP       |
| Comparative Toxicogenomics Database | TAX1BP3     |
| Comparative Toxicogenomics Database | TBATA       |
| Comparative Toxicogenomics Database | TBC1D2      |
| Comparative Toxicogenomics Database | TBC1D5      |
| Comparative Toxicogenomics Database | TBC1D7      |
| Comparative Toxicogenomics Database | TBCA        |
| Comparative Toxicogenomics Database | TBCCD1      |
| Comparative Toxicogenomics Database | TBK1        |
| Comparative Toxicogenomics Database | TBL1XR1     |
| Comparative Toxicogenomics Database | TBX1        |
| Comparative Toxicogenomics Database | TBX21       |
| Comparative Toxicogenomics Database | TBX6        |
| Comparative Toxicogenomics Database | TCF12       |
| Comparative Toxicogenomics Database | TCF19       |
| Comparative Toxicogenomics Database | TCF4        |
| Comparative Toxicogenomics Database | TCF7        |
| Comparative Toxicogenomics Database | TCF7L1      |
| Comparative Toxicogenomics Database | TCF7L2      |
| Comparative Toxicogenomics Database | TCOF1       |
| Comparative Toxicogenomics Database | TCP11L2     |
| Comparative Toxicogenomics Database | TCRA        |

|                                     |          |
|-------------------------------------|----------|
| Comparative Toxicogenomics Database | TCRB     |
| Comparative Toxicogenomics Database | TDO2     |
| Comparative Toxicogenomics Database | TDP1     |
| Comparative Toxicogenomics Database | TDP2     |
| Comparative Toxicogenomics Database | TECR     |
| Comparative Toxicogenomics Database | TENT2    |
| Comparative Toxicogenomics Database | TENT5C   |
| Comparative Toxicogenomics Database | TERF1    |
| Comparative Toxicogenomics Database | TERT     |
| Comparative Toxicogenomics Database | TES      |
| Comparative Toxicogenomics Database | TEX264   |
| Comparative Toxicogenomics Database | TEX30    |
| Comparative Toxicogenomics Database | TF       |
| Comparative Toxicogenomics Database | TFAM     |
| Comparative Toxicogenomics Database | TFAP2A   |
| Comparative Toxicogenomics Database | TFAP2C   |
| Comparative Toxicogenomics Database | TFAP4    |
| Comparative Toxicogenomics Database | TFB1M    |
| Comparative Toxicogenomics Database | TFDP1    |
| Comparative Toxicogenomics Database | TFF1     |
| Comparative Toxicogenomics Database | TFF3     |
| Comparative Toxicogenomics Database | TFPI     |
| Comparative Toxicogenomics Database | TFPI2    |
| Comparative Toxicogenomics Database | TFRC     |
| Comparative Toxicogenomics Database | TG       |
| Comparative Toxicogenomics Database | TGFA     |
| Comparative Toxicogenomics Database | TGFB1    |
| Comparative Toxicogenomics Database | TGFB2    |
| Comparative Toxicogenomics Database | TGFB3    |
| Comparative Toxicogenomics Database | TGFBI    |
| Comparative Toxicogenomics Database | TGFBR1   |
| Comparative Toxicogenomics Database | TGFBR2   |
| Comparative Toxicogenomics Database | TGFBR3   |
| Comparative Toxicogenomics Database | TGIF1    |
| Comparative Toxicogenomics Database | TGIF2    |
| Comparative Toxicogenomics Database | TGM1     |
| Comparative Toxicogenomics Database | TGM3     |
| Comparative Toxicogenomics Database | TGM5     |
| Comparative Toxicogenomics Database | TH       |
| Comparative Toxicogenomics Database | THBD     |
| Comparative Toxicogenomics Database | THBS1    |
| Comparative Toxicogenomics Database | THOC1    |
| Comparative Toxicogenomics Database | THPO     |
| Comparative Toxicogenomics Database | THRA     |
| Comparative Toxicogenomics Database | THRAP3   |
| Comparative Toxicogenomics Database | THRB     |
| Comparative Toxicogenomics Database | THRSP    |
| Comparative Toxicogenomics Database | THSD4    |
| Comparative Toxicogenomics Database | THY1     |
| Comparative Toxicogenomics Database | TICAM1   |
| Comparative Toxicogenomics Database | TIFA     |
| Comparative Toxicogenomics Database | TIGAR    |
| Comparative Toxicogenomics Database | TIMELESS |
| Comparative Toxicogenomics Database | TIMM10   |
| Comparative Toxicogenomics Database | TIMM13   |
| Comparative Toxicogenomics Database | TIMM22   |
| Comparative Toxicogenomics Database | TIMM23   |
| Comparative Toxicogenomics Database | TIMM44   |

|                                     |          |
|-------------------------------------|----------|
| Comparative Toxicogenomics Database | TIMM8A   |
| Comparative Toxicogenomics Database | TIMM8B   |
| Comparative Toxicogenomics Database | TIMP1    |
| Comparative Toxicogenomics Database | TIMP2    |
| Comparative Toxicogenomics Database | TIMP3    |
| Comparative Toxicogenomics Database | TIMP4    |
| Comparative Toxicogenomics Database | TINF2    |
| Comparative Toxicogenomics Database | TIPIN    |
| Comparative Toxicogenomics Database | TJP1     |
| Comparative Toxicogenomics Database | TJP3     |
| Comparative Toxicogenomics Database | TK1      |
| Comparative Toxicogenomics Database | TKT      |
| Comparative Toxicogenomics Database | TLCD3A   |
| Comparative Toxicogenomics Database | TLK1     |
| Comparative Toxicogenomics Database | TLK2     |
| Comparative Toxicogenomics Database | TLR1     |
| Comparative Toxicogenomics Database | TLR2     |
| Comparative Toxicogenomics Database | TLR3     |
| Comparative Toxicogenomics Database | TLR4     |
| Comparative Toxicogenomics Database | TLR5     |
| Comparative Toxicogenomics Database | TLR8     |
| Comparative Toxicogenomics Database | TM4SF5   |
| Comparative Toxicogenomics Database | TM6SF1   |
| Comparative Toxicogenomics Database | TMC4     |
| Comparative Toxicogenomics Database | TMED10   |
| Comparative Toxicogenomics Database | TMED3    |
| Comparative Toxicogenomics Database | TMED4    |
| Comparative Toxicogenomics Database | TMED5    |
| Comparative Toxicogenomics Database | TMEM106C |
| Comparative Toxicogenomics Database | TMEM107  |
| Comparative Toxicogenomics Database | TMEM109  |
| Comparative Toxicogenomics Database | TMEM11   |
| Comparative Toxicogenomics Database | TMEM117  |
| Comparative Toxicogenomics Database | TMEM135  |
| Comparative Toxicogenomics Database | TMEM164  |
| Comparative Toxicogenomics Database | TMEM181  |
| Comparative Toxicogenomics Database | TMEM199  |
| Comparative Toxicogenomics Database | TMEM237  |
| Comparative Toxicogenomics Database | TMEM26   |
| Comparative Toxicogenomics Database | TMEM263  |
| Comparative Toxicogenomics Database | TMEM33   |
| Comparative Toxicogenomics Database | TMEM38B  |
| Comparative Toxicogenomics Database | TMEM40   |
| Comparative Toxicogenomics Database | TMEM41B  |
| Comparative Toxicogenomics Database | TMEM47   |
| Comparative Toxicogenomics Database | TMEM64   |
| Comparative Toxicogenomics Database | TMEM70   |
| Comparative Toxicogenomics Database | TMEM97   |
| Comparative Toxicogenomics Database | TMPO     |
| Comparative Toxicogenomics Database | TMPRSS2  |
| Comparative Toxicogenomics Database | TMPRSS3  |
| Comparative Toxicogenomics Database | TMSB10   |
| Comparative Toxicogenomics Database | TMSB15A  |
| Comparative Toxicogenomics Database | TMSB4X   |
| Comparative Toxicogenomics Database | TMSB4Y   |
| Comparative Toxicogenomics Database | TMTC2    |
| Comparative Toxicogenomics Database | TMX1     |
| Comparative Toxicogenomics Database | TMX4     |

|                                     |           |
|-------------------------------------|-----------|
| Comparative Toxicogenomics Database | TNF       |
| Comparative Toxicogenomics Database | TNFAIP3   |
| Comparative Toxicogenomics Database | TNFAIP6   |
| Comparative Toxicogenomics Database | TNFAIP8L2 |
| Comparative Toxicogenomics Database | NFRSF10A  |
| Comparative Toxicogenomics Database | NFRSF10B  |
| Comparative Toxicogenomics Database | NFRSF10C  |
| Comparative Toxicogenomics Database | NFRSF10D  |
| Comparative Toxicogenomics Database | NFRSF11A  |
| Comparative Toxicogenomics Database | NFRSF11B  |
| Comparative Toxicogenomics Database | NFRSF1A   |
| Comparative Toxicogenomics Database | NFRSF1B   |
| Comparative Toxicogenomics Database | NFRSF21   |
| Comparative Toxicogenomics Database | NFRSF25   |
| Comparative Toxicogenomics Database | TNFRSF9   |
| Comparative Toxicogenomics Database | TNFSF10   |
| Comparative Toxicogenomics Database | TNFSF11   |
| Comparative Toxicogenomics Database | TNFSF14   |
| Comparative Toxicogenomics Database | TNIP1     |
| Comparative Toxicogenomics Database | TNK2      |
| Comparative Toxicogenomics Database | TNMD      |
| Comparative Toxicogenomics Database | TNNC1     |
| Comparative Toxicogenomics Database | TNNT2     |
| Comparative Toxicogenomics Database | TNNT3     |
| Comparative Toxicogenomics Database | TNPO1     |
| Comparative Toxicogenomics Database | TNS1      |
| Comparative Toxicogenomics Database | TOB2      |
| Comparative Toxicogenomics Database | TOMM22    |
| Comparative Toxicogenomics Database | TOMM34    |
| Comparative Toxicogenomics Database | TOMM7     |
| Comparative Toxicogenomics Database | TOMM70A   |
| Comparative Toxicogenomics Database | TOP1      |
| Comparative Toxicogenomics Database | TOP2A     |
| Comparative Toxicogenomics Database | TOP2B     |
| Comparative Toxicogenomics Database | TOPBP1    |
| Comparative Toxicogenomics Database | TOR1B     |
| Comparative Toxicogenomics Database | TP53      |
| Comparative Toxicogenomics Database | TP53BP2   |
| Comparative Toxicogenomics Database | TP53I3    |
| Comparative Toxicogenomics Database | TP53INP1  |
| Comparative Toxicogenomics Database | TP63      |
| Comparative Toxicogenomics Database | TP73      |
| Comparative Toxicogenomics Database | TPD52L1   |
| Comparative Toxicogenomics Database | TPI1      |
| Comparative Toxicogenomics Database | TPM2      |
| Comparative Toxicogenomics Database | TPM3      |
| Comparative Toxicogenomics Database | TPM4      |
| Comparative Toxicogenomics Database | TPMT      |
| Comparative Toxicogenomics Database | TPO       |
| Comparative Toxicogenomics Database | TPR       |
| Comparative Toxicogenomics Database | TPRG1L    |
| Comparative Toxicogenomics Database | TPT1      |
| Comparative Toxicogenomics Database | TPTE      |
| Comparative Toxicogenomics Database | TPX2      |
| Comparative Toxicogenomics Database | TRA2A     |
| Comparative Toxicogenomics Database | TRA2B     |
| Comparative Toxicogenomics Database | TRABD     |
| Comparative Toxicogenomics Database | TRABD2A   |

|                                     |          |
|-------------------------------------|----------|
| Comparative Toxicogenomics Database | TRAC     |
| Comparative Toxicogenomics Database | TRAF1    |
| Comparative Toxicogenomics Database | TRAF2    |
| Comparative Toxicogenomics Database | TRAF6    |
| Comparative Toxicogenomics Database | TRAM1    |
| Comparative Toxicogenomics Database | TRAP1    |
| Comparative Toxicogenomics Database | TRAPPC3  |
| Comparative Toxicogenomics Database | TRAPPC5  |
| Comparative Toxicogenomics Database | TRAPPC6A |
| Comparative Toxicogenomics Database | TRERF1   |
| Comparative Toxicogenomics Database | TRGV9    |
| Comparative Toxicogenomics Database | TRH      |
| Comparative Toxicogenomics Database | TRIM13   |
| Comparative Toxicogenomics Database | TRIM28   |
| Comparative Toxicogenomics Database | TRIM59   |
| Comparative Toxicogenomics Database | TRIM63   |
| Comparative Toxicogenomics Database | TRIO     |
| Comparative Toxicogenomics Database | TRIP13   |
| Comparative Toxicogenomics Database | TRMT6    |
| Comparative Toxicogenomics Database | TROAP    |
| Comparative Toxicogenomics Database | TRP53    |
| Comparative Toxicogenomics Database | TRPC5    |
| Comparative Toxicogenomics Database | TRPC6    |
| Comparative Toxicogenomics Database | TSC1     |
| Comparative Toxicogenomics Database | TSC2     |
| Comparative Toxicogenomics Database | TSC22D1  |
| Comparative Toxicogenomics Database | TSC22D2  |
| Comparative Toxicogenomics Database | TSC22D3  |
| Comparative Toxicogenomics Database | TSEN15   |
| Comparative Toxicogenomics Database | TSFM     |
| Comparative Toxicogenomics Database | TSG101   |
| Comparative Toxicogenomics Database | TSHB     |
| Comparative Toxicogenomics Database | TSHR     |
| Comparative Toxicogenomics Database | TSHZ1    |
| Comparative Toxicogenomics Database | TSN      |
| Comparative Toxicogenomics Database | TSPAN1   |
| Comparative Toxicogenomics Database | TSPAN12  |
| Comparative Toxicogenomics Database | TSPAN31  |
| Comparative Toxicogenomics Database | TSPAN8   |
| Comparative Toxicogenomics Database | TSPO     |
| Comparative Toxicogenomics Database | TSPYL1   |
| Comparative Toxicogenomics Database | TST      |
| Comparative Toxicogenomics Database | TSTD1    |
| Comparative Toxicogenomics Database | TTC9     |
| Comparative Toxicogenomics Database | TTC9C    |
| Comparative Toxicogenomics Database | TTF2     |
| Comparative Toxicogenomics Database | TTK      |
| Comparative Toxicogenomics Database | TTN      |
| Comparative Toxicogenomics Database | TUB      |
| Comparative Toxicogenomics Database | TUBA1A   |
| Comparative Toxicogenomics Database | TUBA1C   |
| Comparative Toxicogenomics Database | TUBA4A   |
| Comparative Toxicogenomics Database | TUBB4B   |
| Comparative Toxicogenomics Database | TUBB5    |
| Comparative Toxicogenomics Database | TUBB6    |
| Comparative Toxicogenomics Database | TUBG1    |
| Comparative Toxicogenomics Database | TUBGCP4  |
| Comparative Toxicogenomics Database | TUFM     |

|                                     |         |
|-------------------------------------|---------|
| Comparative Toxicogenomics Database | TUT4    |
| Comparative Toxicogenomics Database | TWF2    |
| Comparative Toxicogenomics Database | TWIST1  |
| Comparative Toxicogenomics Database | TWIST2  |
| Comparative Toxicogenomics Database | TXN     |
| Comparative Toxicogenomics Database | TXN2    |
| Comparative Toxicogenomics Database | TXNIP   |
| Comparative Toxicogenomics Database | TXNL1   |
| Comparative Toxicogenomics Database | TXNL4B  |
| Comparative Toxicogenomics Database | TXNRD1  |
| Comparative Toxicogenomics Database | TYMS    |
| Comparative Toxicogenomics Database | TYR     |
| Comparative Toxicogenomics Database | TYROBP  |
| Comparative Toxicogenomics Database | TYRP1   |
| Comparative Toxicogenomics Database | UACA    |
| Comparative Toxicogenomics Database | UAP1    |
| Comparative Toxicogenomics Database | UBA7    |
| Comparative Toxicogenomics Database | UBB     |
| Comparative Toxicogenomics Database | UBC     |
| Comparative Toxicogenomics Database | UBE2C   |
| Comparative Toxicogenomics Database | UBE2D3  |
| Comparative Toxicogenomics Database | UBE2G2  |
| Comparative Toxicogenomics Database | UBE2H   |
| Comparative Toxicogenomics Database | UBE2L3  |
| Comparative Toxicogenomics Database | UBE2QL1 |
| Comparative Toxicogenomics Database | UBE2T   |
| Comparative Toxicogenomics Database | UBE2U   |
| Comparative Toxicogenomics Database | UBE2V1  |
| Comparative Toxicogenomics Database | UBE3A   |
| Comparative Toxicogenomics Database | UBE4A   |
| Comparative Toxicogenomics Database | UCK2    |
| Comparative Toxicogenomics Database | UCP1    |
| Comparative Toxicogenomics Database | UCP2    |
| Comparative Toxicogenomics Database | UCP3    |
| Comparative Toxicogenomics Database | UGCG    |
| Comparative Toxicogenomics Database | UGP2    |
| Comparative Toxicogenomics Database | UGT1A1  |
| Comparative Toxicogenomics Database | UGT1A10 |
| Comparative Toxicogenomics Database | UGT1A3  |
| Comparative Toxicogenomics Database | UGT1A7  |
| Comparative Toxicogenomics Database | UGT1A8  |
| Comparative Toxicogenomics Database | UGT1A9  |
| Comparative Toxicogenomics Database | UGT2B11 |
| Comparative Toxicogenomics Database | UGT2B15 |
| Comparative Toxicogenomics Database | UGT2B5  |
| Comparative Toxicogenomics Database | UGT2B7  |
| Comparative Toxicogenomics Database | UHRF1   |
| Comparative Toxicogenomics Database | ULBP1   |
| Comparative Toxicogenomics Database | ULBP2   |
| Comparative Toxicogenomics Database | ULBP3   |
| Comparative Toxicogenomics Database | ULE-3   |
| Comparative Toxicogenomics Database | UNC119B |
| Comparative Toxicogenomics Database | UNG     |
| Comparative Toxicogenomics Database | UPK1A   |
| Comparative Toxicogenomics Database | UPP1    |
| Comparative Toxicogenomics Database | UQCR    |
| Comparative Toxicogenomics Database | UQCR10  |
| Comparative Toxicogenomics Database | UQCRB   |

|                                     |        |
|-------------------------------------|--------|
| Comparative Toxicogenomics Database | UQCRC1 |
| Comparative Toxicogenomics Database | UQCRC2 |
| Comparative Toxicogenomics Database | UQCRH  |
| Comparative Toxicogenomics Database | UROS   |
| Comparative Toxicogenomics Database | USE1   |
| Comparative Toxicogenomics Database | USH2A  |
| Comparative Toxicogenomics Database | USP1   |
| Comparative Toxicogenomics Database | USP10  |
| Comparative Toxicogenomics Database | USP18  |
| Comparative Toxicogenomics Database | USP2   |
| Comparative Toxicogenomics Database | USP36  |
| Comparative Toxicogenomics Database | USP4   |
| Comparative Toxicogenomics Database | USP47  |
| Comparative Toxicogenomics Database | USP7   |
| Comparative Toxicogenomics Database | UST    |
| Comparative Toxicogenomics Database | UTP11  |
| Comparative Toxicogenomics Database | UTRN   |
| Comparative Toxicogenomics Database | VAMP2  |
| Comparative Toxicogenomics Database | VAPA   |
| Comparative Toxicogenomics Database | VASP   |
| Comparative Toxicogenomics Database | VAV1   |
| Comparative Toxicogenomics Database | VAV3   |
| Comparative Toxicogenomics Database | VCAM1  |
| Comparative Toxicogenomics Database | VCL    |
| Comparative Toxicogenomics Database | VCPKMT |
| Comparative Toxicogenomics Database | VDAC1  |
| Comparative Toxicogenomics Database | VDAC3  |
| Comparative Toxicogenomics Database | VDR    |
| Comparative Toxicogenomics Database | VEGFA  |
| Comparative Toxicogenomics Database | VEGFB  |
| Comparative Toxicogenomics Database | VEGFC  |
| Comparative Toxicogenomics Database | VIM    |
| Comparative Toxicogenomics Database | VKORC1 |
| Comparative Toxicogenomics Database | VNN1   |
| Comparative Toxicogenomics Database | VPS13B |
| Comparative Toxicogenomics Database | VPS25  |
| Comparative Toxicogenomics Database | VPS26C |
| Comparative Toxicogenomics Database | VPS29  |
| Comparative Toxicogenomics Database | VRK1   |
| Comparative Toxicogenomics Database | VSIG2  |
| Comparative Toxicogenomics Database | VTG2   |
| Comparative Toxicogenomics Database | VWF    |
| Comparative Toxicogenomics Database | VXN    |
| Comparative Toxicogenomics Database | WARS   |
| Comparative Toxicogenomics Database | WARS1  |
| Comparative Toxicogenomics Database | WAS    |
| Comparative Toxicogenomics Database | WASF2  |
| Comparative Toxicogenomics Database | WASL   |
| Comparative Toxicogenomics Database | WBP11  |
| Comparative Toxicogenomics Database | WDHD1  |
| Comparative Toxicogenomics Database | WDR43  |
| Comparative Toxicogenomics Database | WDR5   |
| Comparative Toxicogenomics Database | WEE1   |
| Comparative Toxicogenomics Database | WFDC2  |
| Comparative Toxicogenomics Database | WFDC21 |
| Comparative Toxicogenomics Database | WFS1   |
| Comparative Toxicogenomics Database | WNK2   |
| Comparative Toxicogenomics Database | WNT1   |

|                                     |         |
|-------------------------------------|---------|
| Comparative Toxicogenomics Database | WNT10A  |
| Comparative Toxicogenomics Database | WNT10B  |
| Comparative Toxicogenomics Database | WNT2    |
| Comparative Toxicogenomics Database | WNT3A   |
| Comparative Toxicogenomics Database | WNT5A   |
| Comparative Toxicogenomics Database | WNT5B   |
| Comparative Toxicogenomics Database | WRN     |
| Comparative Toxicogenomics Database | WSB1    |
| Comparative Toxicogenomics Database | WWC1    |
| Comparative Toxicogenomics Database | WWP2    |
| Comparative Toxicogenomics Database | XAB2    |
| Comparative Toxicogenomics Database | XBP1    |
| Comparative Toxicogenomics Database | XDH     |
| Comparative Toxicogenomics Database | XIAP    |
| Comparative Toxicogenomics Database | XPO1    |
| Comparative Toxicogenomics Database | XPO5    |
| Comparative Toxicogenomics Database | XRCC1   |
| Comparative Toxicogenomics Database | XRCC2   |
| Comparative Toxicogenomics Database | YARS    |
| Comparative Toxicogenomics Database | YARS1   |
| Comparative Toxicogenomics Database | YARS2   |
| Comparative Toxicogenomics Database | YBX1    |
| Comparative Toxicogenomics Database | YBX3    |
| Comparative Toxicogenomics Database | YIF1A   |
| Comparative Toxicogenomics Database | YIF1B   |
| Comparative Toxicogenomics Database | YIPF5   |
| Comparative Toxicogenomics Database | YPEL2   |
| Comparative Toxicogenomics Database | YPEL5   |
| Comparative Toxicogenomics Database | YWHAB   |
| Comparative Toxicogenomics Database | YWHAE   |
| Comparative Toxicogenomics Database | YWHAG   |
| Comparative Toxicogenomics Database | YWHAH   |
| Comparative Toxicogenomics Database | YWHAQ   |
| Comparative Toxicogenomics Database | YWHAZ   |
| Comparative Toxicogenomics Database | ZBTB10  |
| Comparative Toxicogenomics Database | ZBTB16  |
| Comparative Toxicogenomics Database | ZBTB2   |
| Comparative Toxicogenomics Database | ZBTB7A  |
| Comparative Toxicogenomics Database | ZC2HC1A |
| Comparative Toxicogenomics Database | ZC3H14  |
| Comparative Toxicogenomics Database | ZC3HAV1 |
| Comparative Toxicogenomics Database | ZCCHC7  |
| Comparative Toxicogenomics Database | ZDHHC2  |
| Comparative Toxicogenomics Database | ZDHHC23 |
| Comparative Toxicogenomics Database | ZDHHC7  |
| Comparative Toxicogenomics Database | ZEB1    |
| Comparative Toxicogenomics Database | ZEB2    |
| Comparative Toxicogenomics Database | ZFAND5  |
| Comparative Toxicogenomics Database | ZFP148  |
| Comparative Toxicogenomics Database | ZFP207  |
| Comparative Toxicogenomics Database | ZFP354A |
| Comparative Toxicogenomics Database | ZFP36   |
| Comparative Toxicogenomics Database | ZFP62   |
| Comparative Toxicogenomics Database | ZFP740  |
| Comparative Toxicogenomics Database | ZFP9    |
| Comparative Toxicogenomics Database | ZFP91   |
| Comparative Toxicogenomics Database | ZFR     |
| Comparative Toxicogenomics Database | ZHX2    |



|                                     |          |
|-------------------------------------|----------|
| Comparative Toxicogenomics Database | ZKSCAN1  |
| Comparative Toxicogenomics Database | ZKSCAN2  |
| Comparative Toxicogenomics Database | ZKSCAN3  |
| Comparative Toxicogenomics Database | ZMPSTE24 |
| Comparative Toxicogenomics Database | ZMYM2    |
| Comparative Toxicogenomics Database | ZMYM3    |
| Comparative Toxicogenomics Database | ZNF135   |
| Comparative Toxicogenomics Database | ZNF148   |
| Comparative Toxicogenomics Database | ZNF292   |
| Comparative Toxicogenomics Database | ZNF33B   |
| Comparative Toxicogenomics Database | ZNF367   |
| Comparative Toxicogenomics Database | ZNF385B  |
| Comparative Toxicogenomics Database | ZNF462   |
| Comparative Toxicogenomics Database | ZNF467   |
| Comparative Toxicogenomics Database | ZNF507   |
| Comparative Toxicogenomics Database | ZNF6     |
| Comparative Toxicogenomics Database | ZNF703   |
| Comparative Toxicogenomics Database | ZNF84    |
| Comparative Toxicogenomics Database | ZNF91    |
| Comparative Toxicogenomics Database | ZNRD1    |
| Comparative Toxicogenomics Database | ZNRF2    |
| Comparative Toxicogenomics Database | ZSWIM6   |
| Comparative Toxicogenomics Database | ZSWIM8   |
| Comparative Toxicogenomics Database | ZWILCH   |
| Comparative Toxicogenomics Database | ZWINT    |
| TargetNet                           | ESR1     |
| TargetNet                           | PTGS2    |
| TargetNet                           | CYP1A2   |
| TargetNet                           | STS      |
| TargetNet                           | AKR1B1   |
| TargetNet                           | TUBB2B   |
| TargetNet                           | ALOX5    |
| TargetNet                           | DUSP3    |
| TargetNet                           | RELA     |
| TargetNet                           | CYP19A1  |
| TargetNet                           | PTGS2    |
| TargetNet                           | CA5A     |
| TargetNet                           | ESR2     |
| TargetNet                           | XDH      |
| TargetNet                           | APP      |
| TargetNet                           | MAOB     |
| TargetNet                           | Maob     |
| TargetNet                           | CA12     |
| TargetNet                           | CA14     |
| TargetNet                           | MAOA     |
| TargetNet                           | Maoa     |
| TargetNet                           | PTGS1    |
| TargetNet                           | \POBEC3G |
| TargetNet                           | PTGS1    |
| TargetNet                           | CA9      |
| TargetNet                           | MIF      |
| TargetNet                           | PPO2     |
| TargetNet                           | ache     |
| TargetNet                           | ALOX15   |
| TargetNet                           | CTDSP1   |
| TargetNet                           | AHR      |
| TargetNet                           | \POBEC3A |
| TargetNet                           | HNF4A    |

|           |         |
|-----------|---------|
| TargetNet | HDAC4   |
| TargetNet | CASP9   |
| TargetNet | CES2    |
| TargetNet | MMP9    |
| TargetNet | Tubb2b  |
| TargetNet | BCL2A1  |
| TargetNet | ABCG2   |
| TargetNet | CA7     |
| TargetNet | GPR35   |
| TargetNet | HSD17B1 |
| TargetNet | MGLL    |
| TargetNet | TUBA1A  |
| TargetNet | Alox5   |
| TargetNet | RIPK2   |
| TargetNet | Akr1b1  |
| TargetNet | Ptgs2   |
| TargetNet | CA13    |
| TargetNet | Dyrk1a  |
| TargetNet | CA5B    |
| TargetNet | DNMT1   |
| TargetNet | CA4     |
| TargetNet | CA6     |
| TargetNet | TLR9    |
| TargetNet | HSD17B2 |
| TargetNet | HSD17B3 |
| TargetNet | PRKCE   |
| TargetNet | Grin2b  |
| TargetNet | Htr6    |
| TargetNet | ATP4A   |
| TargetNet | GRM4    |
| TargetNet | CDC25B  |
| TargetNet | PIM1    |
| TargetNet | GRIN2B  |
| TargetNet | HCAR2   |
| TargetNet | Ar      |
| TargetNet | PLIN5   |
| TargetNet | NR2F2   |
| TargetNet | PLIN1   |
| TargetNet | PRKCD   |
| TargetNet | CES1    |
| TargetNet | ALPL    |
| TargetNet | Grin1   |
| TargetNet | PRKCG   |
| TargetNet | PLA2G1B |
| TargetNet | AKR1B1  |
| TargetNet | CA1     |
| TargetNet | HDAC6   |
| TargetNet | Drd1    |
| TargetNet | Nos2    |
| TargetNet | lef     |
| TargetNet | PRKACA  |
| TargetNet | Rac1    |
| TargetNet | CA2     |
| TargetNet | MCL1    |
| TargetNet | S1PR4   |
| TargetNet | PTPN1   |
| TargetNet | CACNA1B |
| TargetNet | HDAC8   |

|           |         |
|-----------|---------|
| TargetNet | ampC    |
| TargetNet | DRD1    |
| TargetNet | ADRA2C  |
| TargetNet | Slc6a3  |
| TargetNet | Chrna7  |
| TargetNet | METAP2  |
| TargetNet | PTPN7   |
| TargetNet | RORA    |
| TargetNet | RARA    |
| TargetNet | TAAR1   |
| TargetNet | HTR5A   |
| TargetNet | Taar1   |
| TargetNet | GALR3   |
| TargetNet | DRD5    |
| TargetNet | SIGMAR1 |
| TargetNet | PLAU    |
| TargetNet | RPS6KA3 |
| TargetNet | HDAC2   |
| TargetNet | RET     |
| TargetNet | HTR1E   |
| TargetNet | Pdgfrb  |
| TargetNet | ACHE    |
| TargetNet | RARG    |
| TargetNet | CSNK2A1 |
| TargetNet | S1PR1   |
| TargetNet | Cnr2    |
| TargetNet | HRFAM7A |
| TargetNet | RARB    |
| TargetNet | S1PR2   |
| TargetNet | Chrm2   |
| TargetNet | Adra2c  |
| TargetNet | CLK1    |
| TargetNet | EGFR    |
| TargetNet | CHRM4   |
| TargetNet | PTGER2  |
| TargetNet | FYN     |
| TargetNet | HTR2C   |
| TargetNet | NR1H3   |
| TargetNet | AKR1C3  |
| TargetNet | PRSS2   |
| TargetNet | DYRK1A  |
| TargetNet | Oprk1   |
| TargetNet | MDM2    |
| TargetNet | CYP2C19 |
| TargetNet | CHRNA7  |
| TargetNet | ABCB1   |
| TargetNet | BCHE    |
| TargetNet | ache    |
| TargetNet | EGFR    |
| TargetNet | CACNA1H |
| TargetNet | RAC1    |
| TargetNet | PTPN22  |
| TargetNet | ADRA2A  |
| TargetNet | PTPRC   |
| TargetNet | TNF     |
| TargetNet | PTGES   |
| TargetNet | PDGFRA  |
| TargetNet | NR1H4   |

|           |           |
|-----------|-----------|
| TargetNet | -HSP90AA1 |
| TargetNet | CDK5      |
| TargetNet | Htr2c     |
| TargetNet | CYP2C9    |
| TargetNet | SERPINE1  |
| TargetNet | TERT      |
| TargetNet | AR        |
| TargetNet | SRC       |
| TargetNet | PRKCB     |
| TargetNet | THRA      |
| TargetNet | Sigmar1   |
| TargetNet | RAF1      |
| TargetNet | OPRK1     |
| TargetNet | MMP12     |
| TargetNet | PTK2      |
| TargetNet | CYP11B2   |
| TargetNet | DHODH     |
| TargetNet | CYP17A1   |
| TargetNet | GSK3B     |
| TargetNet | CDK1      |
| TargetNet | FLT3      |
| TargetNet | CHRM1     |
| TargetNet | CHRNA4    |
| TargetNet | OPRK1     |
| TargetNet | OPRD1     |
| TargetNet | PDGFRB    |
| TargetNet | SYK       |
| TargetNet | MAPKAPK2  |
| TargetNet | DRD2      |
| TargetNet | CHRM5     |
| TargetNet | NOS3      |
| TargetNet | GSK3A     |
| TargetNet | HDAC3     |
| TargetNet | SLC6A3    |
| TargetNet | Chrna4    |
| TargetNet | HDAC1     |
| TargetNet | Oprm1     |
| TargetNet | GRIA2     |
| TargetNet | CDC42     |
| TargetNet | MMP2      |
| TargetNet | Adora2a   |
| TargetNet | Drd4      |
| TargetNet | ACE       |
| TargetNet | PLAT      |
| TargetNet | ICAM1     |
| TargetNet | HDAC1     |
| TargetNet | S1PR5     |
| TargetNet | CYSLTR1   |
| TargetNet | ANPEP     |
| TargetNet | Ache      |
| TargetNet | OPRM1     |
| TargetNet | PDE4D     |
| TargetNet | AKT1      |
| TargetNet | CRHR1     |
| TargetNet | SRD5A2    |
| TargetNet | PTGER1    |
| TargetNet | MME       |
| TargetNet | Cnr1      |

|           |         |
|-----------|---------|
| TargetNet | SCN5A   |
| TargetNet | ADRA1A  |
| TargetNet | HCRTR2  |
| TargetNet | Trpv1   |
| TargetNet | CCR3    |
| TargetNet | CTSB    |
| TargetNet | PTGDR2  |
| TargetNet | P2RY12  |
| TargetNet | WEE1    |
| TargetNet | Agtr1b  |
| TargetNet | ADORA3  |
| TargetNet | TMIGD3  |
| TargetNet | AGTR1   |
| TargetNet | PTAFR   |
| TargetNet | Tacr1   |
| TargetNet | ADRA1D  |
| TargetNet | GRM2    |
| TargetNet | ACACA   |
| TargetNet | THRB    |
| TargetNet | ADA     |
| TargetNet | VCAM1   |
| TargetNet | SIRT1   |
| TargetNet | TNK2    |
| TargetNet | Htr1a   |
| TargetNet | SCD     |
| TargetNet | MLNR    |
| TargetNet | ACACB   |
| TargetNet | PDE2A   |
| TargetNet | ALK     |
| TargetNet | Mc1r    |
| TargetNet | MC1R    |
| TargetNet | ITGB5   |
| TargetNet | HSD11B2 |
| TargetNet | NPY1R   |
| TargetNet | ADRA2B  |
| TargetNet | ADRA1B  |
| TargetNet | HRH1    |
| TargetNet | LTB4R   |
| TargetNet | Ednrb   |
| TargetNet | TACR2   |
| TargetNet | Fnta    |
| TargetNet | IMPDH2  |
| TargetNet | AGTR2   |
| TargetNet | Adra1a  |
| TargetNet | MTNR1B  |
| TargetNet | BMP1    |
| TargetNet | HMGCR   |
| TargetNet | HTR3A   |
| TargetNet | PGR     |
| TargetNet | Htr3a   |
| TargetNet | ADAM10  |
| TargetNet | PIM2    |
| TargetNet | ACHE    |
| TargetNet | GHSR    |
| TargetNet | FDFT1   |
| TargetNet | LTA4H   |
| TargetNet | ADORA1  |
| TargetNet | Adra1d  |

|           |         |
|-----------|---------|
| TargetNet | SLC5A2  |
| TargetNet | CTSS    |
| TargetNet | LRRK2   |
| TargetNet | CNR2    |
| TargetNet | AVPR1A  |
| TargetNet | PRKCQ   |
| TargetNet | JAK1    |
| TargetNet | CXCR2   |
| TargetNet | CXCR1   |
| TargetNet | MC3R    |
| TargetNet | HRH2    |
| TargetNet | ACE     |
| TargetNet | PTGIR   |
| TargetNet | MAP2K1  |
| TargetNet | Ptger4  |
| TargetNet | JAK3    |
| TargetNet | ERBB2   |
| TargetNet | CDK4    |
| TargetNet | NTRK1   |
| TargetNet | EPHB4   |
| TargetNet | ITGB3   |
| TargetNet | PDE7A   |
| TargetNet | PTPN2   |
| TargetNet | CCR4    |
| TargetNet | BACE1   |
| TargetNet | KCNH2   |
| TargetNet | CACNA1G |
| TargetNet | Adora1  |
| TargetNet | Hmgcr   |
| TargetNet | FGFR1   |
| TargetNet | OPRL1   |
| TargetNet | NPY5R   |
| TargetNet | SIRT2   |
| TargetNet | MC5R    |
| TargetNet | DRD4    |
| TargetNet | CCNA1   |
| TargetNet | Oprm1   |
| TargetNet | PTGFR   |
| TargetNet | PREP    |
| TargetNet | NPBWR1  |
| TargetNet | Dpp4    |
| TargetNet | TGM2    |
| TargetNet | SOAT1   |
| TargetNet | MTOR    |
| TargetNet | AKT3    |
| TargetNet | Avpr2   |
| TargetNet | IGF1R   |
| TargetNet | Grm1    |
| TargetNet | Crhr1   |
| TargetNet | ICMT    |
| TargetNet | KCNA5   |
| TargetNet | GRB2    |
| TargetNet | PIK3CG  |
| TargetNet | DHFR    |
| TargetNet | Dhfr    |
| TargetNet | RXRB    |
| TargetNet | ADRB1   |
| TargetNet | ZAP70   |

|           |         |
|-----------|---------|
| TargetNet | MET     |
| TargetNet | Dhfr    |
| TargetNet | CTSL    |
| TargetNet | PPARD   |
| TargetNet | MPL     |
| TargetNet | EPHX2   |
| TargetNet | BTK     |
| TargetNet | HTR4    |
| TargetNet | TGFBR1  |
| TargetNet | TRPV1   |
| TargetNet | AVPR2   |
| TargetNet | TACR1   |
| TargetNet | MCHR1   |
| TargetNet | Ptger2  |
| TargetNet | CTSG    |
| TargetNet | BACE2   |
| TargetNet | CA4     |
| TargetNet | EDNRA   |
| TargetNet | PTGDR   |
| TargetNet | TACR3   |
| TargetNet | F2R     |
| TargetNet | Ednra   |
| TargetNet | HTR1F   |
| TargetNet | HCRTR1  |
| TargetNet | PSEN2   |
| TargetNet | ADORA2A |
| TargetNet | ADORA2B |
| TargetNet | Cnr2    |
| TargetNet | CASR    |
| TargetNet | Hrh1    |
| TargetNet | SSTR4   |
| TargetNet | CASP8   |
| TargetNet | Fdft1   |
| TargetNet | P2RY6   |
| TargetNet | ROCK1   |
| TargetNet | TEK     |
| TargetNet | CDK5R1  |
| TargetNet | CDK2    |
| TargetNet | FNTB    |
| TargetNet | Htr4    |
| TargetNet | FNTB    |
| TargetNet | Nos1    |
| TargetNet | NOS1    |
| TargetNet | PRSS1   |
| TargetNet | Drd2    |
| TargetNet | HTR1D   |
| TargetNet | HTR1B   |
| TargetNet | HTR2A   |
| TargetNet | HCK     |
| TargetNet | MAPK11  |
| TargetNet | TYK2    |
| TargetNet | SLC9A1  |
| TargetNet | PTGER4  |
| TargetNet | Mc5r    |
| TargetNet | ITK     |
| TargetNet | RXRA    |
| TargetNet | CSF1R   |
| TargetNet | CTSD    |

|           |         |
|-----------|---------|
| TargetNet | DRD2    |
| TargetNet | F7      |
| TargetNet | PLA2G2A |
| TargetNet | Adora3  |
| TargetNet | P2RY1   |
| TargetNet | KDR     |
| TargetNet | EDNRB   |
| TargetNet | GCK     |
| TargetNet | CYP3A4  |
| TargetNet | NOS2    |
| TargetNet | KIF11   |
| TargetNet | JAK2    |
| TargetNet | OXTR    |
| TargetNet | BDKRB2  |
| TargetNet | S1PR3   |
| TargetNet | Cckbr   |
| TargetNet | Cckar   |
| TargetNet | Ptger3  |
| TargetNet | AGTR1   |
| TargetNet | Oxtr    |
| TargetNet | ECE1    |
| TargetNet | XIAP    |
| TargetNet | Mc4r    |
| TargetNet | Prkca   |
| TargetNet | ITGB1   |
| TargetNet | PYGL    |
| TargetNet | PLK1    |
| TargetNet | MAPK9   |
| TargetNet | PGGT1B  |
| TargetNet | MAPK8   |
| TargetNet | FOLH1   |
| TargetNet | NR3C2   |
| TargetNet | RPS6KB1 |
| TargetNet | PLG     |
| TargetNet | F10     |
| TargetNet | Htr1b   |
| TargetNet | MAP3K8  |
| TargetNet | ITGAL   |
| TargetNet | AVPR1B  |
| TargetNet | Prcp    |
| TargetNet | KCNA3   |
| TargetNet | CXCR3   |
| TargetNet | Faah    |
| TargetNet | Hrh3    |
| TargetNet | PLD2    |
| TargetNet | MTNR1A  |
| TargetNet | GPR119  |
| TargetNet | Slc6a1  |
| TargetNet | LIPE    |
| TargetNet | FLT4    |
| TargetNet | PIM3    |
| TargetNet | CALCRL  |
| TargetNet | CHRM2   |
| TargetNet | MC4R    |
| TargetNet | MAPK10  |
| TargetNet | BRS3    |
| TargetNet | CCR1    |
| TargetNet | PNP     |



|           |           |
|-----------|-----------|
| TargetNet | PTGER3    |
| TargetNet | Ace       |
| TargetNet | SSTR5     |
| TargetNet | REN       |
| TargetNet | DPP4      |
| TargetNet | SLC5A1    |
| TargetNet | ADRA1A    |
| TargetNet | ADAM17    |
| TargetNet | PDPK1     |
| TargetNet | Scd1      |
| TargetNet | SSTR3     |
| TargetNet | Agtr2     |
| TargetNet | Hsd11b1   |
| TargetNet | MMP3      |
| TargetNet | P2rx7     |
| TargetNet | DRD3      |
| TargetNet | EDNRB     |
| TargetNet | NR2E3     |
| TargetNet | NR3C1     |
| TargetNet | HTR7      |
| TargetNet | ALOX5AP   |
| TargetNet | Chrm1     |
| TargetNet | Chrm3     |
| TargetNet | Avpr1a    |
| TargetNet | GCGR      |
| TargetNet | CCNE2     |
| TargetNet | SLC6A2    |
| TargetNet | CHEK2     |
| TargetNet | P2RY2     |
| TargetNet | PAK4      |
| TargetNet | ATP4A     |
| TargetNet | SRD5A1    |
| TargetNet | DPP8      |
| TargetNet | CASP7     |
| TargetNet | CASP6     |
| TargetNet | ADAM17    |
| TargetNet | CCR5      |
| TargetNet | HSD11B1   |
| TargetNet | CCR8      |
| TargetNet | Slc6a1    |
| TargetNet | HTR1A     |
| TargetNet | PDE4B     |
| TargetNet | SLC6A4    |
| TargetNet | Grm5      |
| TargetNet | HRH1      |
| TargetNet | Cckbr     |
| TargetNet | SIGMAR1   |
| TargetNet | LYN       |
| TargetNet | SELE      |
| TargetNet | KISS1R    |
| TargetNet | TOP1      |
| TargetNet | CASP1     |
| TargetNet | CXCR4     |
| TargetNet | MAPK1     |
| TargetNet | PDE3A     |
| TargetNet | -HSP90AB1 |
| TargetNet | DRD1      |
| TargetNet | CLK4      |

|           |         |
|-----------|---------|
| TargetNet | ADRB3   |
| TargetNet | MLYCD   |
| TargetNet | Scd1    |
| TargetNet | Soat1   |
| TargetNet | SLC6A9  |
| TargetNet | FAAH    |
| TargetNet | Pde10a  |
| TargetNet | TBXA2R  |
| TargetNet | GPBAR1  |
| TargetNet | ITGA2B  |
| TargetNet | CYP2D6  |
| TargetNet | NPY2R   |
| TargetNet | AXL     |
| TargetNet | BDKRB1  |
| TargetNet | CCKAR   |
| TargetNet | CCKBR   |
| TargetNet | SSTR2   |
| TargetNet | CYP11B1 |
| TargetNet | SSTR1   |
| TargetNet | FDPS    |
| TargetNet | Tspo    |
| TargetNet | PRCP    |
| TargetNet | LCK     |
| TargetNet | CDK9    |
| TargetNet | AKT2    |
| TargetNet | Htr7    |
| TargetNet | Oprd1   |
| TargetNet | Oprd1   |
| TargetNet | TBXAS1  |
| TargetNet | EGLN1   |
| TargetNet | F3      |
| TargetNet | DRD1    |
| TargetNet | APH1B   |
| TargetNet | CHRM3   |
| TargetNet | 56k.02  |
| TargetNet | Tyms    |
| TargetNet | Hsd11b2 |
| TargetNet | OPRM1   |
| TargetNet | Drd3    |
| TargetNet | MMP1    |
| TargetNet | BCL2    |
| TargetNet | ADK     |
| TargetNet | Mme     |
| TargetNet | CDC7    |
| TargetNet | Grm2    |
| TargetNet | ITGA4   |
| TargetNet | FFAR1   |
| TargetNet | TPSAB1  |
| TargetNet | Ache    |
| TargetNet | IKBKB   |
| TargetNet | Tbxas1  |
| TargetNet | ROCK2   |
| TargetNet | SCN9A   |
| TargetNet | PSENNEN |
| TargetNet | PNMT    |
| TargetNet | Mapk14  |
| TargetNet | DPP9    |
| TargetNet | ELANE   |

|           |         |
|-----------|---------|
| TargetNet | HRH4    |
| TargetNet | FLT1    |
| TargetNet | MTTP    |
| TargetNet | IRAK4   |
| TargetNet | APH1A   |
| TargetNet | NCSTN   |
| TargetNet | PPARG   |
| TargetNet | PIK3CB  |
| TargetNet | PIK3CA  |
| TargetNet | MMP13   |
| TargetNet | MMP8    |
| TargetNet | NTSR1   |
| TargetNet | F2      |
| TargetNet | F2      |
| TargetNet | CMA1    |
| TargetNet | AGTR1   |
| TargetNet | PDE10A  |
| TargetNet | HTR6    |
| TargetNet | CTSK    |
| TargetNet | SLC29A1 |
| TargetNet | ADORA1  |
| TargetNet | CDK7    |
| TargetNet | DPP7    |
| TargetNet | RXRG    |
| TargetNet | PLA2G7  |
| TargetNet | ITGAV   |
| TargetNet | Slc6a4  |
| TargetNet | TPSB2   |
| TargetNet | AURKA   |
| TargetNet | FKBP1A  |
| TargetNet | FKBP1A  |
| TargetNet | CCR2    |
| TargetNet | P2RX7   |
| TargetNet | UL80    |
| TargetNet | PARP1   |
| TargetNet | CAPN1   |
| TargetNet | Htr2a   |
| TargetNet | PIK3CD  |
| TargetNet | PDE4A   |
| TargetNet | MAPK14  |
| TargetNet | PDE5A   |
| TargetNet | TYRO3   |
| TargetNet | HRH3    |
| TargetNet | GNRHR   |
| TargetNet | Gnrhr   |
| TargetNet | CETP    |
| TargetNet | BCL2L1  |
| TargetNet | MMP7    |
| TargetNet | PPARA   |
| TargetNet | ABL1    |
| TargetNet | TYMS    |
| TargetNet | HRH3    |
| TargetNet | DGAT1   |
| TargetNet | EDNRA   |
| TargetNet | SMO     |
| TargetNet | PSEN1   |
| TargetNet | FURIN   |
| TargetNet | BRAF    |

TargetNet  
TargetNet  
TargetNet

UTS2R  
CASP3  
CNR1
