# Supplementary material for: Network Pharmacology Reveals That Resveratrol Can Alleviate COVID-19-Related Hyperinflammation
Source: Hindawi journal article supplement (doi:10.1155/2021/4129993), 2021-09-22
Supplement: f2 [file 4129993.f2.pdf]

## SARS-CoV-2 DEGs

| entrezID | Gene      | logFC   | t       | P.Value  | adj.P.Val | B        |
|----------|-----------|---------|---------|----------|-----------|----------|
| 9580     | CSF3      | 5.35878 | 6.51124 | 0.001065 | 0.11138   | -0.16265 |
| 16941    | CXCL5     | 3.79406 | 6.63459 | 0.000974 | 0.10812   | -0.07115 |
| 1432     | S100A7    | 3.65499 | 8.79362 | 0.000703 | 0.09825   | 0.39507  |
| 1418     | SPRR2E    | 3.64936 | 16.4945 | 1.02E-05 | 0.01991   | 3.88821  |
| 13615    | CCL20     | 3.17437 | 19.8807 | 3.87E-06 | 0.01262   | 4.46892  |
| 7436     | PLA2G4E   | 3.07466 | 6.77971 | 0.005098 | 0.20608   | -1.32957 |
| 17957    | CSF2      | 3.02754 | 8.64976 | 0.000268 | 0.06303   | 1.2081   |
| 17087    | DDIT4L    | 3.02443 | 7.77001 | 0.000455 | 0.08274   | 0.69581  |
| 19803    | IL6       | 3.01195 | 8.67696 | 0.000264 | 0.06303   | 1.22293  |
| 1415     | SPRR2D    | 2.9672  | 12.3332 | 4.51E-05 | 0.03337   | 2.79191  |
| 6953     | IFI27     | 2.96693 | 8.98783 | 0.000222 | 0.05968   | 1.3885   |
| 19443    | VNN3      | 2.87152 | 12.6512 | 3.96E-05 | 0.03232   | 2.89634  |
| 7503     | IMGN2P4I  | 2.76209 | 4.99186 | 0.00645  | 0.22902   | -1.80313 |
| 13014    | IL36G     | 2.74713 | 20.1254 | 3.63E-06 | 0.01262   | 4.5034   |
| 9090     | XAF1      | 2.74619 | 5.74572 | 0.001913 | 0.13573   | -0.77119 |
| 17770    | BHMT2     | 2.6845  | 12.6322 | 0.028952 | 0.34779   | -2.82805 |
| 8579     | CES1P1    | 2.65444 | 4.61811 | 0.008592 | 0.25187   | -2.10981 |
| 3092     | MIR936    | 2.61403 | 7.07112 | 0.001686 | 0.12957   | -0.42646 |
| 14626    | MX1       | 2.56067 | 8.58728 | 0.000278 | 0.06303   | 1.17381  |
| 443      | IFI6      | 2.54648 | 4.84994 | 0.004117 | 0.18992   | -1.58231 |
| 938      | IFI44L    | 2.54412 | 4.58307 | 0.005273 | 0.20972   | -1.8469  |
| 14354    | SLCO4A1   | 2.5433  | 17.5711 | 0.000251 | 0.062     | 0.76653  |
| 18065    | SLC4A9    | 2.53492 | 10.1214 | 0.006457 | 0.22902   | -1.56491 |
| 7819     | BCL2A1    | 2.51164 | 7.00557 | 0.000751 | 0.09825   | 0.19393  |
| 18665    | HIST1H2AI | 2.49766 | 3.28354 | 0.041357 | 0.38301   | -3.44578 |
| 10348    | L3MBTL4   | 2.4743  | 4.0693  | 0.008733 | 0.25267   | -2.38818 |
| 751      | PDZK1IP1  | 2.45498 | 9.39842 | 0.000178 | 0.05381   | 1.59645  |
| 11576    | CEACAM7   | 2.44408 | 2.59518 | 0.04639  | 0.39779   | -4.17224 |
| 3612     | SAA2      | 2.43196 | 31.7637 | 3.37E-07 | 0.00551   | 5.48808  |
| 1430     | S100A7A   | 2.4234  | 5.33356 | 0.010533 | 0.26981   | -2.00846 |
| 14625    | MX2       | 2.41422 | 4.92378 | 0.00385  | 0.18107   | -1.51103 |
| 5634     | SYCP3     | 2.3822  | 4.9238  | 0.006788 | 0.2331    | -1.85743 |
| 21083    | HTRA4     | 2.34225 | 16.8499 | 0.002083 | 0.14102   | -1.11389 |
| 5251     | KRT78     | 2.31326 | 4.65553 | 0.004926 | 0.20401   | -1.77396 |
| 16942    | CXCL3     | 2.30899 | 5.91717 | 0.001669 | 0.12957   | -0.62854 |
| 16935    | IL8       | 2.29924 | 20.8568 | 3.02E-06 | 0.01262   | 4.60149  |
| 14215    | MMP9      | 2.26505 | 8.24438 | 0.00034  | 0.07097   | 0.98008  |
| 6798     | ADAM20    | 2.22081 | 8.86727 | 0.00864  | 0.25187   | -1.73815 |
| 3613     | SAA1      | 2.20601 | 11.0132 | 8.01E-05 | 0.03608   | 2.3105   |
| 8899     | IL17C     | 2.19126 | 3.71299 | 0.018547 | 0.31681   | -2.94445 |
| 3611     | SAA4      | 2.18721 | 4.01394 | 0.01418  | 0.29627   | -2.65178 |
| 19444    | VNN2      | 2.18428 | 3.06168 | 0.026371 | 0.34437   | -3.57392 |
| 3334     | SNORA52   | 2.12634 | 4.15352 | 0.008019 | 0.24676   | -2.29652 |
| 1426     | PGLYRP4   | 2.07863 | 25.8828 | 9.81E-07 | 0.00801   | 5.11622  |
| 10862    | TNFSF14   | 2.07553 | 8.85711 | 0.000239 | 0.06181   | 1.31976  |
| 5562     | LUM       | 2.05063 | 9.64943 | 0.040369 | 0.38082   | -2.93621 |
| 10799    | FSD1      | 2.05063 | 9.64943 | 0.040369 | 0.38082   | -2.93621 |
| 16425    | C3orf65   | 2.05063 | 9.64943 | 0.040369 | 0.38082   | -2.93621 |
| 986      | GBP5      | 2.04639 | 4.04879 | 0.008918 | 0.25371   | -2.41068 |
| 11743    | MIR320E   | 2.03953 | 9.59721 | 0.04064  | 0.38113   | -2.9389  |
| 10923    | ADAMTS10  | 2.03559 | 3.47616 | 0.03555  | 0.36766   | -3.28039 |
| 3607     | MRGPRX3   | 2.03166 | 7.87998 | 0.000424 | 0.07961   | 0.76346  |
| 15157    | NFAM1     | 2.01275 | 3.97479 | 0.014673 | 0.3011    | -2.68898 |
| 13868    | PCNA-AS1  | 1.98577 | 3.14057 | 0.046445 | 0.39783   | -3.57313 |
| 22208    | RNF183    | 1.96896 | 3.95419 | 0.00983  | 0.26209   | -2.51535 |
| 19442    | VNN1      | 1.95711 | 7.9684  | 0.000402 | 0.07783   | 0.81708  |

|       |           |         |         |          |         |          |
|-------|-----------|---------|---------|----------|---------|----------|
| 21657 | RLN1      | 1.94249 | 5.47152 | 0.002395 | 0.14819 | -1.00744 |
| 875   | PDE4B     | 1.92141 | 3.33604 | 0.019213 | 0.31967 | -3.23528 |
| 18790 | TNF       | 1.91253 | 8.42399 | 0.000306 | 0.06565 | 1.08273  |
| 10215 | C1QTNF1   | 1.90039 | 11.6074 | 6.14E-05 | 0.03386 | 2.53727  |
| 9323  | SLC47A1   | 1.89308 | 13.8175 | 0.00324  | 0.16471 | -1.25223 |
| 17121 | RPL34-AS  | 1.89308 | 13.8175 | 0.00324  | 0.16471 | -1.25223 |
| 1108  | SYPL2     | 1.89308 | 8.90811 | 0.044543 | 0.39147 | -2.97801 |
| 2621  | GLUD1P7   | 1.89308 | 8.90811 | 0.044543 | 0.39147 | -2.97801 |
| 18607 | HIST1H1T  | 1.89308 | 8.90811 | 0.044543 | 0.39147 | -2.97801 |
| 8098  | SYNGR3    | 1.8629  | 4.31938 | 0.006799 | 0.2331  | -2.11937 |
| 14177 | PI3       | 1.85823 | 6.84321 | 0.00084  | 0.10209 | 0.07975  |
| 18951 | ETV7      | 1.8572  | 3.26158 | 0.020913 | 0.33203 | -3.32609 |
| 9598  | KRT24     | 1.85414 | 8.46199 | 0.000299 | 0.06507 | 1.10412  |
| 1429  | S100A8    | 1.85057 | 11.8571 | 5.51E-05 | 0.03337 | 2.62754  |
| 22552 | GRIN1     | 1.85025 | 6.66976 | 0.002123 | 0.142   | -0.65451 |
| 13198 | LY75      | 1.84986 | 2.59916 | 0.046161 | 0.3975  | -4.16704 |
| 10969 | ICAM1     | 1.84524 | 9.83086 | 0.000142 | 0.05033 | 1.80312  |
| 18830 | CFB       | 1.84363 | 12.3442 | 4.49E-05 | 0.03337 | 2.79558  |
| 3741  | C11orf94  | 1.84196 | 4.04697 | 0.013779 | 0.29315 | -2.62061 |
| 14223 | MKRN7P    | 1.82876 | 2.80712 | 0.035749 | 0.36766 | -3.89736 |
| 18112 | PCDHB11   | 1.82134 | 5.24518 | 0.005359 | 0.20979 | -1.60681 |
| 19942 | INHBA     | 1.81783 | 14.593  | 1.91E-05 | 0.02594 | 3.45323  |
| 16656 | CPZ       | 1.7998  | 8.21846 | 0.010206 | 0.26813 | -1.849   |
| 18617 | HIST1H4E  | 1.7902  | 3.26267 | 0.020887 | 0.33203 | -3.32476 |
| 16936 | CXCL6     | 1.78204 | 5.19745 | 0.003023 | 0.1615  | -1.25399 |
| 14959 | SEC14L4   | 1.77906 | 4.72668 | 0.00461  | 0.19884 | -1.70314 |
| 4449  | BIRC3     | 1.72034 | 11.3099 | 7.00E-05 | 0.03386 | 2.42593  |
| 21841 | CCIN      | 1.71908 | 3.25924 | 0.042171 | 0.38558 | -3.46715 |
| 22774 | XK        | 1.71737 | 3.14338 | 0.023968 | 0.34271 | -3.47194 |
| 5746  | OAS1      | 1.70105 | 11.0382 | 7.92E-05 | 0.03608 | 2.32042  |
| 18791 | LTB       | 1.69426 | 10.4869 | 0.000103 | 0.03803 | 2.09445  |
| 23147 | DRP2      | 1.68876 | 7.21997 | 0.001552 | 0.12727 | -0.34579 |
| 2833  | BEND3P3   | 1.67775 | 4.23051 | 0.020665 | 0.33034 | -2.69773 |
| 1416  | SPRR2A    | 1.67647 | 9.49321 | 0.000169 | 0.05381 | 1.6428   |
| 14695 | ITGB2     | 1.67297 | 2.75475 | 0.038103 | 0.37458 | -3.96487 |
| 14413 | _INC00176 | 1.66579 | 3.87407 | 0.010686 | 0.26998 | -2.60515 |
| 579   | ZC3H12A   | 1.64774 | 10.6952 | 9.29E-05 | 0.03608 | 2.18178  |
| 1144  | CHI3L2    | 1.64017 | 4.56074 | 0.016665 | 0.30865 | -2.52803 |
| 3304  | IFITM1    | 1.63795 | 9.04345 | 0.000215 | 0.05968 | 1.41737  |
| 20132 | NCF1      | 1.61766 | 3.64963 | 0.013574 | 0.29288 | -2.86233 |
| 20078 | TF2IRD1F  | 1.60842 | 7.75905 | 0.001164 | 0.11657 | -0.07003 |
| 15324 | IRAK2     | 1.60827 | 13.137  | 3.27E-05 | 0.03194 | 3.04819  |
| 3320  | IRF7      | 1.59423 | 6.23591 | 0.001306 | 0.11938 | -0.37326 |
| 11087 | MIR27A    | 1.5866  | 4.17517 | 0.043198 | 0.38771 | -3.14785 |
| 14840 | ZNF280A   | 1.5866  | 4.17517 | 0.043198 | 0.38771 | -3.14785 |
| 15664 | SLC38A3   | 1.5866  | 4.17517 | 0.043198 | 0.38771 | -3.14785 |
| 9974  | _OC64563  | 1.58493 | 3.10451 | 0.025079 | 0.34437 | -3.52035 |
| 16897 | SULT1B1   | 1.57431 | 3.57253 | 0.021121 | 0.33332 | -3.08639 |
| 19984 | SNORA9    | 1.57425 | 2.95197 | 0.038931 | 0.37765 | -3.75428 |
| 19478 | TNFAIP3   | 1.57167 | 13.3721 | 2.98E-05 | 0.03194 | 3.11848  |
| 1669  | HSPA7     | 1.56368 | 3.11862 | 0.02467  | 0.34437 | -3.50275 |
| 19620 | CAHM      | 1.5538  | 3.83567 | 0.016598 | 0.30865 | -2.82327 |
| 1808  | ASTN1     | 1.55347 | 2.64998 | 0.043341 | 0.38771 | -4.10075 |
| 18524 | MAK       | 1.54977 | 6.44487 | 0.005953 | 0.2216  | -1.45997 |
| 10207 | DNAH17    | 1.53986 | 3.14115 | 0.046423 | 0.39783 | -3.57261 |
| 1233  | HIST2H2B  | 1.53897 | 2.67229 | 0.042163 | 0.38558 | -4.07173 |
| 17221 | MGARP     | 1.53784 | 3.26138 | 0.020917 | 0.33203 | -3.32633 |
| 9236  | MGC12916  | 1.53268 | 6.91809 | 0.000797 | 0.10073 | 0.13276  |

|       |           |         |         |          |         |          |
|-------|-----------|---------|---------|----------|---------|----------|
| 3280  | .OC61920  | 1.52905 | 4.2527  | 0.007262 | 0.23571 | -2.19005 |
| 5156  | RND1      | 1.52776 | 7.95411 | 0.000405 | 0.07783 | 0.80846  |
| 9919  | C17orf67  | 1.52705 | 3.15509 | 0.023644 | 0.34271 | -3.45739 |
| 7122  | TNFAIP2   | 1.5269  | 8.93105 | 0.000229 | 0.06027 | 1.3588   |
| 5569  | PLEKHG7   | 1.52402 | 3.73332 | 0.012404 | 0.28394 | -2.76547 |
| 6527  | MDP1      | 1.52289 | 18.6779 | 3.10E-05 | 0.03194 | 2.55796  |
| 17751 | F2RL2     | 1.51457 | 14.0989 | 0.000508 | 0.08727 | 0.21022  |
| 4189  | CARNS1    | 1.51457 | 11.0548 | 0.005314 | 0.20979 | -1.46318 |
| 5297  | .OC40004  | 1.51457 | 11.0548 | 0.005314 | 0.20979 | -1.46318 |
| 2719  | DNAJC12   | 1.51299 | 3.80443 | 0.01707  | 0.31081 | -2.85388 |
| 13687 | UGT1A1    | 1.51041 | 3.51404 | 0.022316 | 0.34001 | -3.14651 |
| 22350 | .OC38979  | 1.50441 | 3.94203 | 0.015101 | 0.30253 | -2.7203  |
| 5236  | KRT6B     | 1.49815 | 12.869  | 3.63E-05 | 0.03232 | 2.96555  |
| 19594 | SOD2      | 1.479   | 10.7511 | 9.05E-05 | 0.03608 | 2.20479  |
| 17960 | SLC22A4   | 1.46899 | 2.93979 | 0.030469 | 0.35413 | -3.72778 |
| 7248  | ORD116-   | 1.46609 | 5.74899 | 0.022112 | 0.33976 | -2.47494 |
| 12671 | .OC64483  | 1.46609 | 5.74899 | 0.022112 | 0.33976 | -2.47494 |
| 10863 | C3        | 1.46424 | 11.978  | 5.23E-05 | 0.03337 | 2.67022  |
| 21406 | TMEM74    | 1.45528 | 4.0159  | 0.023931 | 0.34271 | -2.85338 |
| 21094 | C8orf4    | 1.44287 | 3.89394 | 0.010466 | 0.26962 | -2.58278 |
| 11091 | NANOS3    | 1.43733 | 3.76029 | 0.012052 | 0.28015 | -2.7345  |
| 6964  | SERPINA3  | 1.43618 | 6.78393 | 0.000876 | 0.10209 | 0.03736  |
| 16781 | RHOH      | 1.43596 | 3.03858 | 0.035612 | 0.36766 | -3.65716 |
| 22465 | RNU6ATAC  | 1.42413 | 2.70246 | 0.040625 | 0.38113 | -4.03255 |
| 8700  | PAR6A     | 1.41727 | 4.10497 | 0.013108 | 0.28675 | -2.5663  |
| 19936 | .OC64699  | 1.41416 | 3.49874 | 0.016013 | 0.30597 | -3.03983 |
| 3995  | SNORA57   | 1.40541 | 2.9815  | 0.028992 | 0.34779 | -3.67491 |
| 21105 | PLAT      | 1.38861 | 11.2926 | 7.06E-05 | 0.03386 | 2.41932  |
| 16944 | CXCL2     | 1.38498 | 6.56058 | 0.001027 | 0.11053 | -0.12584 |
| 3961  | RPLP0P2   | 1.38033 | 3.78885 | 0.011691 | 0.27656 | -2.70183 |
| 17426 | TRIML2    | 1.37796 | 6.17618 | 0.001366 | 0.12019 | -0.42014 |
| 16938 | CXCL1     | 1.37763 | 13.0905 | 3.33E-05 | 0.03194 | 3.03405  |
| 10590 | SERPINB4  | 1.37487 | 3.46306 | 0.01666  | 0.30865 | -3.08234 |
| 19923 | GPR141    | 1.37063 | 5.24467 | 0.005361 | 0.20979 | -1.6072  |
| 14167 | KCNK15    | 1.36743 | 3.55797 | 0.021411 | 0.33499 | -3.1013  |
| 11187 | BST2      | 1.35932 | 5.37057 | 0.002607 | 0.15449 | -1.09701 |
| 21911 | CBWD3     | 1.35361 | 8.62441 | 0.002416 | 0.14819 | -0.63847 |
| 17551 | TTC23L    | 1.35361 | 5.85634 | 0.021256 | 0.33415 | -2.43872 |
| 7407  | C15orf62  | 1.35027 | 8.82756 | 0.000243 | 0.06186 | 1.30404  |
| 4414  | HEPHL1    | 1.33741 | 11.9328 | 5.33E-05 | 0.03337 | 2.65434  |
| 6995  | HHIPL1    | 1.33373 | 3.42303 | 0.017421 | 0.31081 | -3.13027 |
| 16360 | CNMB2-IT  | 1.33329 | 5.32355 | 0.026037 | 0.34437 | -2.62919 |
| 18186 | SPINK6    | 1.32911 | 7.17384 | 0.004284 | 0.19312 | -1.17884 |
| 22155 | TAL2      | 1.32911 | 7.17384 | 0.004284 | 0.19312 | -1.17884 |
| 8557  | NOD2      | 1.32701 | 2.91081 | 0.031544 | 0.35525 | -3.76463 |
| 15708 | .INC00696 | 1.32236 | 2.81727 | 0.035311 | 0.36687 | -3.88431 |
| 7909  | RHCG      | 1.31899 | 10.7105 | 9.22E-05 | 0.03608 | 2.18806  |
| 14947 | LIF       | 1.28596 | 12.7367 | 3.83E-05 | 0.03232 | 2.92374  |
| 4226  | MYEOV     | 1.28551 | 7.30361 | 0.000614 | 0.09199 | 0.39641  |
| 5422  | CYP27B1   | 1.28414 | 5.65892 | 0.002052 | 0.1407  | -0.84488 |
| 5747  | OAS3      | 1.28112 | 8.06905 | 0.000378 | 0.0752  | 0.87728  |
| 16759 | FLJ13197  | 1.28011 | 9.34344 | 0.007702 | 0.24213 | -1.66665 |
| 9303  | CDC144E   | 1.28011 | 11.9163 | 0.000869 | 0.10209 | -0.05701 |
| 18064 | HBEGF     | 1.27899 | 11.9491 | 5.30E-05 | 0.03337 | 2.66007  |
| 19541 | C1006527  | 1.27752 | 8.20871 | 0.000347 | 0.07097 | 0.95937  |
| 19061 | C6orf223  | 1.27579 | 3.43061 | 0.017274 | 0.31081 | -3.12117 |
| 16310 | SPTSSB    | 1.27361 | 11.6343 | 0.000223 | 0.05968 | 1.34389  |
| 5235  | KRT75     | 1.25747 | 5.02515 | 0.003517 | 0.1713  | -1.41452 |

|       |           |         |         |          |         |          |
|-------|-----------|---------|---------|----------|---------|----------|
| 20324 | SPDYE3    | 1.25601 | 8.53236 | 0.009401 | 0.25871 | -1.79329 |
| 965   | COL24A1   | 1.25087 | 2.67568 | 0.041987 | 0.38461 | -4.06731 |
| 5748  | OAS2      | 1.24603 | 9.01475 | 0.000219 | 0.05968 | 1.4025   |
| 19965 | AEBP1     | 1.24407 | 5.66125 | 0.002048 | 0.1407  | -0.84288 |
| 9810  | ITGB3     | 1.24233 | 7.01867 | 0.000744 | 0.09825 | 0.20302  |
| 8691  | TPPP3     | 1.23638 | 12.4673 | 0.000753 | 0.09825 | 0.20904  |
| 17133 | RRH       | 1.23638 | 8.46586 | 0.009564 | 0.26011 | -1.80475 |
| 21748 | IFNK      | 1.23638 | 8.46586 | 0.009564 | 0.26011 | -1.80475 |
| 6520  | IRF9      | 1.22725 | 17.486  | 7.51E-06 | 0.01991 | 4.08067  |
| 15471 | SLC22A14  | 1.22404 | 2.8744  | 0.032955 | 0.35978 | -3.81109 |
| 1428  | S100A12   | 1.22345 | 5.25297 | 0.002882 | 0.15996 | -1.20317 |
| 7500  | C15orf48  | 1.21887 | 15.918  | 1.22E-05 | 0.01991 | 3.76615  |
| 18764 | MUC21     | 1.21514 | 6.67238 | 0.000948 | 0.10668 | -0.04346 |
| 2722  | MYPN      | 1.21422 | 3.73409 | 0.012394 | 0.28394 | -2.76459 |
| 8161  | IL32      | 1.20763 | 9.59918 | 0.00016  | 0.05327 | 1.69391  |
| 18228 | TNIP1     | 1.19814 | 16.1682 | 1.13E-05 | 0.01991 | 3.8201   |
| 14370 | HAR1B     | 1.19265 | 8.70506 | 0.008997 | 0.25371 | -1.76432 |
| 16084 | GATA2     | 1.19265 | 8.70506 | 0.008997 | 0.25371 | -1.76432 |
| 3046  | IC1002895 | 1.19265 | 8.70506 | 0.008997 | 0.25371 | -1.76432 |
| 21022 | NUGGC     | 1.19265 | 8.70506 | 0.008997 | 0.25371 | -1.76432 |
| 23264 | SLC6A14   | 1.19015 | 11.8523 | 5.52E-05 | 0.03337 | 2.62581  |
| 4275  | P2RY6     | 1.18984 | 5.30586 | 0.002754 | 0.15778 | -1.15519 |
| 15263 | IC1001446 | 1.18926 | 3.90291 | 0.025914 | 0.34437 | -3.01398 |
| 23033 | IL2RG     | 1.18544 | 4.84028 | 0.007231 | 0.23571 | -1.925   |
| 17288 | TLR2      | 1.18196 | 4.0332  | 0.009061 | 0.25393 | -2.42783 |
| 9683  | STAT5A    | 1.18103 | 4.66397 | 0.004887 | 0.20292 | -1.76552 |
| 8631  | TEPP      | 1.18001 | 3.02376 | 0.027576 | 0.34456 | -3.62158 |
| 3461  | TRIM34    | 1.178   | 2.7232  | 0.049553 | 0.40479 | -4.01649 |
| 16820 | CWH43     | 1.16469 | 3.23607 | 0.021533 | 0.33593 | -3.35739 |
| 8137  | PRSS27    | 1.15966 | 3.51753 | 0.015684 | 0.3044  | -3.01752 |
| 3201  | .OC39981: | 1.15694 | 3.08778 | 0.025575 | 0.34437 | -3.54124 |
| 15066 | MAFF      | 1.15202 | 10.7912 | 8.88E-05 | 0.03608 | 2.22121  |
| 20941 | 3GALNAC   | 1.14061 | 4.27843 | 0.007079 | 0.23571 | -2.16269 |
| 22833 | IC1001339 | 1.12432 | 2.9758  | 0.029189 | 0.34779 | -3.68212 |
| 20887 | FAM167A   | 1.12388 | 5.86322 | 0.001742 | 0.12957 | -0.67301 |
| 7492  | DUOXA2    | 1.12228 | 4.35681 | 0.006555 | 0.22952 | -2.08002 |
| 6104  | EPSTI1    | 1.11908 | 4.26525 | 0.007172 | 0.23571 | -2.17669 |
| 15097 | SNORD43   | 1.11184 | 5.03603 | 0.003483 | 0.17049 | -1.40426 |
| 7182  | .OC64621: | 1.10785 | 4.13094 | 0.008204 | 0.24836 | -2.32097 |
| 18535 | EDN1      | 1.09935 | 7.66003 | 0.000487 | 0.08551 | 0.62705  |
| 7788  | .OC64575: | 1.09882 | 4.38738 | 0.039015 | 0.37765 | -3.03906 |
| 2546  | MAP3K8    | 1.09582 | 13.5458 | 2.79E-05 | 0.03194 | 3.16915  |
| 18873 | PSMB9     | 1.0936  | 2.97148 | 0.02934  | 0.34779 | -3.68758 |
| 4461  | MMP13     | 1.09308 | 4.1421  | 0.008112 | 0.24695 | -2.30888 |
| 11798 | PLA2G4C   | 1.09109 | 4.7271  | 0.004608 | 0.19884 | -1.70272 |
| 21129 | EFCAB1    | 1.09002 | 3.10947 | 0.024934 | 0.34437 | -3.51415 |
| 2019  | SLC26A9   | 1.08939 | 4.5594  | 0.009002 | 0.25371 | -2.15991 |
| 16857 | ARL9      | 1.08893 | 2.64089 | 0.043832 | 0.38922 | -4.1126  |
| 18920 | PACSIN1   | 1.08345 | 5.89135 | 0.003442 | 0.1692  | -1.1449  |
| 9311  | SLC5A10   | 1.07964 | 2.79099 | 0.036456 | 0.36981 | -3.91812 |
| 10205 | SOCS3     | 1.07648 | 7.20645 | 0.000655 | 0.09462 | 0.33139  |
| 5370  | IL23A     | 1.06066 | 3.4291  | 0.017303 | 0.31081 | -3.12298 |
| 20431 | NRCAM     | 1.05937 | 5.63683 | 0.002089 | 0.14102 | -0.86379 |
| 13011 | IL1A      | 1.0488  | 6.35509 | 0.001194 | 0.11813 | -0.281   |
| 14388 | HELZ2     | 1.04458 | 3.31605 | 0.019654 | 0.32199 | -3.25957 |
| 7601  | C2CD4A    | 1.0412  | 3.53665 | 0.015357 | 0.30253 | -2.99489 |
| 15256 | TYMP      | 1.03291 | 4.34518 | 0.00663  | 0.22968 | -2.09222 |
| 1427  | S100A9    | 1.03014 | 11.3052 | 7.02E-05 | 0.03386 | 2.42412  |

|       |           |          |          |          |         |          |
|-------|-----------|----------|----------|----------|---------|----------|
| 15092 | PDGFB     | 1.0248   | 8.49578  | 0.000293 | 0.06466 | 1.12303  |
| 18715 | ZFP57     | 1.02128  | 3.82762  | 0.011221 | 0.27445 | -2.6577  |
| 19175 | _INC00472 | 1.02034  | 4.41911  | 0.006169 | 0.22622 | -2.01501 |
| 7455  | TGM5      | 1.01903  | 5.87172  | 0.00173  | 0.12957 | -0.66598 |
| 3269  | ADAM8     | 1.01675  | 5.55158  | 0.002241 | 0.14404 | -0.9374  |
| 13012 | IL1B      | 1.01325  | 10.796   | 8.86E-05 | 0.03608 | 2.22315  |
| 7240  | ORD116-   | 1.01136  | 4.03816  | 0.046241 | 0.39755 | -3.22164 |
| 17679 | ADAMTS6   | 1.0079   | 2.62825  | 0.044523 | 0.39147 | -4.12906 |
| 11730 | IGFL1     | 1.00538  | 3.1136   | 0.024815 | 0.34437 | -3.50901 |
| 9718  | IFI35     | 1.00407  | 4.99449  | 0.003614 | 0.17373 | -1.44355 |
| 17388 | .OC38924  | -1.00113 | -6.18393 | 0.002854 | 0.15996 | -0.95266 |
| 5726  | MYL2      | -1.00321 | -5.68142 | 0.022677 | 0.34077 | -2.49828 |
| 12970 | CCDC138   | -1.00433 | -4.07394 | 0.008692 | 0.25207 | -2.3831  |
| 9652  | KRT15     | -1.00436 | -7.06134 | 0.000723 | 0.09825 | 0.23251  |
| 20658 | FAM131B   | -1.00478 | -2.54372 | 0.049466 | 0.40479 | -4.23959 |
| 19459 | ALDH8A1   | -1.00611 | -2.74944 | 0.038351 | 0.3766  | -3.97172 |
| 10699 | EFNA2     | -1.00757 | -7.42013 | 0.001392 | 0.12019 | -0.24047 |
| 5204  | METTL7A   | -1.00808 | -6.90908 | 0.000802 | 0.10073 | 0.12641  |
| 11141 | CYP4F3    | -1.00897 | -3.90055 | 0.010394 | 0.26908 | -2.57535 |
| 4438  | CNTN5     | -1.02623 | -5.70263 | 0.008624 | 0.25187 | -1.83133 |
| 21135 | ST18      | -1.02623 | -5.70263 | 0.008624 | 0.25187 | -1.83133 |
| 15354 | FBLN2     | -1.02771 | -2.55712 | 0.048645 | 0.40294 | -4.22203 |
| 1212  | VTCN1     | -1.02839 | -5.55818 | 0.002229 | 0.14404 | -0.93167 |
| 16114 | FAM86HP   | -1.02902 | -2.90363 | 0.031817 | 0.35525 | -3.77379 |
| 7962  | LOC91948  | -1.02945 | -3.15039 | 0.0318   | 0.35525 | -3.5336  |
| 7506  | SEMA6D    | -1.03256 | -5.0339  | 0.00349  | 0.17049 | -1.40627 |
| 16730 | PARGC1    | -1.03601 | -10.7351 | 9.11E-05 | 0.03608 | 2.1982   |
| 9551  | _INC00672 | -1.04151 | -3.76795 | 0.011954 | 0.27827 | -2.72572 |
| 23236 | RGAG1     | -1.04166 | -2.81466 | 0.035423 | 0.36703 | -3.88767 |
| 14292 | BMP7      | -1.04387 | -3.64286 | 0.013674 | 0.29288 | -2.87021 |
| 2826  | ZMIZ1-AS  | -1.0448  | -5.62062 | 0.002117 | 0.142   | -0.87772 |
| 21136 | FAM150A   | -1.04977 | -8.37445 | 0.002649 | 0.15475 | -0.71623 |
| 11468 | ATSPERC   | -1.06101 | -3.47817 | 0.016382 | 0.30865 | -3.0643  |
| 21736 | ELAVL2    | -1.06595 | -3.3326  | 0.019288 | 0.32019 | -3.23946 |
| 14311 | X16-NPEF  | -1.06675 | -2.6758  | 0.041981 | 0.38461 | -4.06716 |
| 11663 | IGSF23    | -1.06816 | -4.90025 | 0.013525 | 0.29288 | -2.25863 |
| 597   | POU3F1    | -1.06864 | -4.14059 | 0.012714 | 0.28579 | -2.53322 |
| 8324  | CRYM-AS   | -1.07864 | -3.32237 | 0.019513 | 0.32066 | -3.25189 |
| 18316 | .OC25735  | -1.08199 | -3.91533 | 0.04923  | 0.40479 | -3.29029 |
| 20738 | ATG9B     | -1.08201 | -7.00425 | 0.000751 | 0.09825 | 0.19302  |
| 22171 | PALM2     | -1.09001 | -3.0646  | 0.026281 | 0.34437 | -3.57027 |
| 2640  | ZNF488    | -1.09522 | -9.02529 | 0.000217 | 0.05968 | 1.40797  |
| 615   | HPCAL4    | -1.0959  | -2.672   | 0.042178 | 0.38558 | -4.0721  |
| 12459 | CCDC121   | -1.10466 | -3.03245 | 0.027295 | 0.34437 | -3.61064 |
| 13056 | GLI2      | -1.10598 | -2.71938 | 0.03979  | 0.37893 | -4.01062 |
| 16726 | IC100505  | -1.11064 | -3.11536 | 0.024764 | 0.34437 | -3.50681 |
| 13095 | IC1002164 | -1.11441 | -4.03265 | 0.046369 | 0.39779 | -3.22467 |
| 4617  | CCDC153   | -1.11823 | -2.73179 | 0.039189 | 0.37765 | -3.99455 |
| 2714  | VJD1C-AS  | -1.12595 | -4.55545 | 0.005413 | 0.21081 | -1.87492 |
| 2695  | FAM13C    | -1.13385 | -3.77722 | 0.011837 | 0.27794 | -2.71511 |
| 11962 | IGLON5    | -1.1396  | -3.98265 | 0.009545 | 0.26011 | -2.48371 |
| 18626 | HIST1H3C  | -1.14475 | -5.35786 | 0.010391 | 0.26908 | -2.02423 |
| 10039 | RGS9      | -1.14609 | -7.78566 | 0.011486 | 0.27625 | -1.93293 |
| 8835  | PKD1L2    | -1.15057 | -3.57109 | 0.014787 | 0.30218 | -2.95426 |
| 8955  | DBIL5P    | -1.16092 | -3.34335 | 0.019055 | 0.31916 | -3.2264  |
| 3190  | BTBD16    | -1.16596 | -3.33874 | 0.03958  | 0.37823 | -3.48907 |
| 2256  | NID1      | -1.16997 | -5.27567 | 0.002826 | 0.15925 | -1.18253 |
| 11628 | PINLYP    | -1.17264 | -3.78515 | 0.011737 | 0.27718 | -2.70605 |

|       |           |          |          |          |         |          |
|-------|-----------|----------|----------|----------|---------|----------|
| 7863  | SH3GL3    | -1.17351 | -2.73655 | 0.038961 | 0.37765 | -3.98839 |
| 1794  | SNORD74   | -1.18326 | -4.62762 | 0.005056 | 0.20576 | -1.80195 |
| 17191 | CETN4P    | -1.19616 | -4.51351 | 0.036795 | 0.36981 | -2.97742 |
| 20374 | IC1002895 | -1.19624 | -3.85521 | 0.0109   | 0.27069 | -2.62644 |
| 17114 | DKK2      | -1.19832 | -3.17395 | 0.023133 | 0.3422  | -3.43402 |
| 19182 | C6orf147  | -1.20182 | -3.44296 | 0.023876 | 0.34271 | -3.22037 |
| 4535  | DRD2      | -1.2078  | -4.11861 | 0.022293 | 0.33997 | -2.77793 |
| 18110 | PCDHB9    | -1.2078  | -4.11861 | 0.022293 | 0.33997 | -2.77793 |
| 23194 | RAB9B     | -1.20864 | -8.66542 | 0.00238  | 0.14819 | -0.70885 |
| 3981  | ASRGL1    | -1.23211 | -6.80398 | 0.000864 | 0.10209 | 0.05174  |
| 14754 | PRODH     | -1.23238 | -3.1004  | 0.0252   | 0.34437 | -3.52548 |
| 10920 | PRAM1     | -1.23244 | -3.8015  | 0.027872 | 0.34501 | -3.09522 |
| 20912 | OC72973   | -1.23697 | -7.33677 | 0.013072 | 0.28675 | -2.02974 |
| 23259 | LRCH2     | -1.23697 | -7.33677 | 0.013072 | 0.28675 | -2.02974 |
| 581   | MIR5581   | -1.23697 | -4.17054 | 0.021518 | 0.33593 | -2.80792 |
| 17943 | SLC27A6   | -1.26331 | -3.98222 | 0.009549 | 0.26011 | -2.48418 |
| 9873  | OC28408   | -1.27387 | -4.05452 | 0.008866 | 0.25371 | -2.40438 |
| 6730  | SYT16     | -1.28085 | -4.84906 | 0.00412  | 0.18992 | -1.58316 |
| 2046  | CR1       | -1.28951 | -9.41204 | 0.007579 | 0.24008 | -1.65697 |
| 15721 | SEMA3G    | -1.30062 | -3.20386 | 0.030146 | 0.35291 | -3.47526 |
| 4504  | POU2AF1   | -1.30574 | -8.6359  | 0.00027  | 0.06303 | 1.20052  |
| 2482  | CACNB2    | -1.30735 | -7.75427 | 0.011588 | 0.27642 | -1.93936 |
| 18067 | HD1-EIF4E | -1.30735 | -7.75427 | 0.011588 | 0.27642 | -1.93936 |
| 106   | IC1001336 | -1.3235  | -2.78139 | 0.046566 | 0.3981  | -3.94905 |
| 18848 | PT2-EGFL  | -1.32861 | -8.32174 | 0.002701 | 0.15631 | -0.80476 |
| 16450 | MASP1     | -1.3295  | -6.76708 | 0.005127 | 0.20608 | -1.33461 |
| 14479 | INC00113  | -1.33093 | -3.98769 | 0.009495 | 0.26011 | -2.47812 |
| 8361  | PRKCB     | -1.33329 | -5.32355 | 0.026037 | 0.34437 | -2.62919 |
| 1911  | C1orf53   | -1.34091 | -11.414  | 0.000997 | 0.10988 | 0.02895  |
| 10539 | IC1002872 | -1.35102 | -3.00884 | 0.028067 | 0.34566 | -3.64037 |
| 23316 | GRIA3     | -1.35361 | -5.85634 | 0.021256 | 0.33415 | -2.43872 |
| 22621 | ARSE      | -1.35596 | -3.03822 | 0.035625 | 0.36766 | -3.65755 |
| 11821 | NTN5      | -1.35792 | -5.68285 | 0.003953 | 0.18537 | -1.28813 |
| 8541  | ABCC11    | -1.35932 | -3.07544 | 0.025948 | 0.34437 | -3.55669 |
| 18209 | CSF1R     | -1.35957 | -3.08382 | 0.025694 | 0.34437 | -3.5462  |
| 12531 | ARHGEF3   | -1.36614 | -4.05068 | 0.008901 | 0.25371 | -2.4086  |
| 2150  | CNIH3     | -1.37581 | -3.95756 | 0.048172 | 0.40178 | -3.26642 |
| 20735 | ABP1      | -1.37623 | -3.62702 | 0.031698 | 0.35525 | -3.15572 |
| 16040 | MYLK      | -1.37841 | -5.87363 | 0.001728 | 0.12957 | -0.6644  |
| 18008 | CXCL14    | -1.3796  | -5.11062 | 0.003261 | 0.16501 | -1.33434 |
| 22711 | MAP7D2    | -1.38358 | -5.15346 | 0.003141 | 0.16325 | -1.29456 |
| 13466 | CPO       | -1.3888  | -5.24043 | 0.026918 | 0.34437 | -2.66146 |
| 12964 | SULT1C2   | -1.38993 | -4.05369 | 0.013699 | 0.29288 | -2.61428 |
| 10072 | MAP2K6    | -1.39489 | -3.7276  | 0.012481 | 0.28483 | -2.77205 |
| 8023  | MIR3176   | -1.39606 | -6.69869 | 0.00093  | 0.10543 | -0.02427 |
| 22653 | FRMPD4    | -1.40875 | -3.23857 | 0.029126 | 0.34779 | -3.43765 |
| 18775 | HCG27     | -1.41195 | -3.39066 | 0.025106 | 0.34437 | -3.27528 |
| 20252 | PDK4      | -1.41498 | -3.18551 | 0.022825 | 0.34077 | -3.41972 |
| 3362  | TNNI2     | -1.41609 | -3.53154 | 0.015443 | 0.30253 | -3.00094 |
| 4470  | CASP5     | -1.41825 | -5.06871 | 0.012247 | 0.28306 | -2.19717 |
| 4827  | ACRBP     | -1.4255  | -3.25009 | 0.02119  | 0.33376 | -3.34017 |
| 13034 | OC44090   | -1.42899 | -3.965   | 0.0248   | 0.34437 | -2.96511 |
| 9117  | SLC2A4    | -1.43153 | -5.80835 | 0.003636 | 0.17373 | -1.20128 |
| 1280  | FMO5      | -1.43261 | -4.99592 | 0.003609 | 0.17373 | -1.44219 |
| 22703 | HKA2-AS   | -1.44035 | -3.8167  | 0.027567 | 0.34456 | -3.08293 |
| 13667 | C2orf82   | -1.44064 | -5.67065 | 0.002033 | 0.1407  | -0.83486 |
| 5984  | TPTE2P1   | -1.44174 | -9.14928 | 0.000203 | 0.05968 | 1.47168  |
| 9107  | ASGR1     | -1.44961 | -3.00241 | 0.036956 | 0.36981 | -3.69757 |

|       |           |          |          |          |         |          |
|-------|-----------|----------|----------|----------|---------|----------|
| 4963  | _OH12CR2  | -1.45308 | -3.3829  | 0.018223 | 0.31367 | -3.17856 |
| 16151 | KY        | -1.46331 | -3.90845 | 0.015556 | 0.30392 | -2.7526  |
| 22182 | ZNF483    | -1.48678 | -3.11342 | 0.02482  | 0.34437 | -3.50924 |
| 12591 | STON1     | -1.49519 | -5.86887 | 0.001734 | 0.12957 | -0.66833 |
| 15768 | DNAH12    | -1.5     | -3.1684  | 0.045396 | 0.39529 | -3.64392 |
| 8577  | SLC6A2    | -1.5133  | -2.75959 | 0.037879 | 0.37416 | -3.95861 |
| 3359  | IFITM10   | -1.52076 | -6.04644 | 0.001509 | 0.12501 | -0.52348 |
| 10458 | ASXL3     | -1.52372 | -4.0176  | 0.009207 | 0.25595 | -2.44503 |
| 13531 | SLC11A1   | -1.52394 | -3.81316 | 0.011394 | 0.27594 | -2.67413 |
| 3166  | NANOS1    | -1.52444 | -4.30548 | 0.006893 | 0.23374 | -2.13405 |
| 9369  | FOXN1     | -1.52514 | -3.4452  | 0.016994 | 0.31081 | -3.10369 |
| 9222  | DNAH9     | -1.54297 | -3.70493 | 0.012788 | 0.28579 | -2.7982  |
| 21417 | _INC00536 | -1.54977 | -4.12459 | 0.022202 | 0.33981 | -2.84245 |
| 20959 | LGI3      | -1.55409 | -4.0435  | 0.008966 | 0.25371 | -2.41649 |
| 23418 | MCF2      | -1.56082 | -3.03372 | 0.027254 | 0.34437 | -3.60904 |
| 18886 | MIR219-1  | -1.56464 | -6.73748 | 0.005197 | 0.20791 | -1.32829 |
| 11275 | ZNF826P   | -1.5655  | -4.28969 | 0.040867 | 0.38216 | -3.08833 |
| 18787 | ATP6V1G2  | -1.56686 | -3.41004 | 0.017676 | 0.31081 | -3.14586 |
| 6632  | KLHDC1    | -1.56768 | -3.42626 | 0.017358 | 0.31081 | -3.12638 |
| 13750 | SNED1     | -1.58335 | -3.09382 | 0.033666 | 0.36001 | -3.59585 |
| 16329 | LRRC34    | -1.60099 | -4.32329 | 0.019429 | 0.32059 | -2.63278 |
| 2916  | IC1001889 | -1.60194 | -3.10632 | 0.033244 | 0.35988 | -3.58206 |
| 3111  | RBM20     | -1.60325 | -4.98285 | 0.003652 | 0.17373 | -1.45461 |
| 17074 | ADH6      | -1.60581 | -3.75187 | 0.028898 | 0.34779 | -3.13563 |
| 12139 | NLRP7     | -1.60635 | -5.47766 | 0.009728 | 0.26173 | -1.93057 |
| 13361 | ANKAR     | -1.61342 | -4.94639 | 0.003773 | 0.17794 | -1.48937 |
| 22645 | IC1002888 | -1.61441 | -4.42371 | 0.038357 | 0.3766  | -3.02108 |
| 8776  | TAT       | -1.62966 | -3.41698 | 0.024478 | 0.34437 | -3.2476  |
| 13267 | DLX2      | -1.63806 | -3.44385 | 0.023856 | 0.34271 | -3.21945 |
| 2821  | DLG5-AS1  | -1.64497 | -2.58457 | 0.047007 | 0.39931 | -4.1861  |
| 23230 | KCNE1L    | -1.64957 | -2.6754  | 0.042002 | 0.38461 | -4.06768 |
| 17291 | DCHS2     | -1.65143 | -8.40567 | 0.002618 | 0.15449 | -0.78072 |
| 17086 | _OC25688  | -1.65871 | -6.1867  | 0.018898 | 0.31791 | -2.33348 |
| 11802 | ZNF114    | -1.67808 | -2.84442 | 0.034169 | 0.36309 | -3.84946 |
| 16056 | ALG1L     | -1.67961 | -3.7475  | 0.017973 | 0.313   | -2.91009 |
| 12395 | PFN4      | -1.68122 | -3.43193 | 0.017248 | 0.31081 | -3.11959 |
| 16508 | _OC40110  | -1.69921 | -2.58504 | 0.04698  | 0.39931 | -4.1855  |
| 721   | IPS15AP1  | -1.71526 | -7.5878  | 0.001273 | 0.11938 | -0.15494 |
| 5725  | CCDC63    | -1.73697 | -8.17347 | 0.049511 | 0.40479 | -3.02874 |
| 10434 | AQP4      | -1.73697 | -8.17347 | 0.049511 | 0.40479 | -3.02874 |
| 6035  | FRY       | -1.75115 | -2.60974 | 0.045558 | 0.39583 | -4.15322 |
| 2710  | EGR2      | -1.75279 | -8.54413 | 0.00079  | 0.10068 | 0.28995  |
| 935   | GIPC2     | -1.76858 | -2.66533 | 0.042527 | 0.38609 | -4.08078 |
| 13822 | SNORD57   | -1.7826  | -5.25999 | 0.026707 | 0.34437 | -2.6538  |
| 15034 | IL2RB     | -1.78469 | -2.9232  | 0.03108  | 0.35487 | -3.74886 |
| 10861 | CD70      | -1.79361 | -12.8593 | 0.000682 | 0.09675 | 0.07054  |
| 4807  | ANO2      | -1.84861 | -2.95039 | 0.038994 | 0.37765 | -3.75606 |
| 14441 | SAMSN1    | -1.85798 | -8.74292 | 0.04558  | 0.39583 | -2.98853 |
| 21086 | ADAM32    | -1.86283 | -16.2908 | 1.08E-05 | 0.01991 | 3.84599  |
| 9313  | GRAP      | -1.91446 | -9.7445  | 0.001645 | 0.12957 | -0.44687 |
| 8769  | IC1001308 | -1.91825 | -7.65919 | 0.011904 | 0.27821 | -1.95914 |
| 22158 | MIR548Q   | -1.91825 | -7.65919 | 0.011904 | 0.27821 | -1.95914 |
| 16166 | NME9      | -1.97315 | -5.37858 | 0.002589 | 0.15449 | -1.08986 |
| 21274 | SLC10A5   | -1.97321 | -11.9598 | 0.000859 | 0.10209 | 0.12612  |
| 4815  | CD27      | -1.98039 | -4.84171 | 0.007223 | 0.23571 | -1.92383 |
| 7613  | IC1001308 | -1.98906 | -8.85784 | 0.002222 | 0.14404 | -0.56903 |
| 4739  | OPCML     | -2       | -9.41121 | 0.041631 | 0.38404 | -2.94876 |
| 15633 | CCDC36    | -2.03953 | -9.59721 | 0.04064  | 0.38113 | -2.9389  |

|       |           |          |          |          |         |          |
|-------|-----------|----------|----------|----------|---------|----------|
| 19623 | PDE10A    | -2.05664 | -14.7452 | 0.00044  | 0.08161 | 0.27268  |
| 1384  | HRNR      | -2.05817 | -9.26203 | 0.007851 | 0.24404 | -1.67834 |
| 22095 | IC1004994 | -2.05889 | -9.68834 | 0.04017  | 0.38082 | -2.93424 |
| 16962 | ART3      | -2.07641 | -21.3634 | 1.76E-05 | 0.02594 | 2.80491  |
| 7775  | C15orf27  | -2.09519 | -3.45108 | 0.023691 | 0.34271 | -3.2119  |
| 19764 | THSD7A    | -2.19935 | -2.87091 | 0.033094 | 0.35978 | -3.81556 |
| 21309 | LRRC69    | -2.21905 | -4.55021 | 0.009068 | 0.25393 | -2.1678  |
| 13381 | DNAH7     | -2.23201 | -2.81874 | 0.035248 | 0.36667 | -3.88243 |
| 1844  | ZNF648    | -2.32193 | -10.9261 | 0.034635 | 0.36557 | -2.88052 |
| 5998  | SNORD10   | -2.36257 | -11.1173 | 0.033901 | 0.3611  | -2.87357 |
| 4417  | GPR83     | -2.4021  | -11.3033 | 0.033214 | 0.35988 | -2.86711 |
| 5905  | RIMBP2    | -2.6845  | -12.6322 | 0.028952 | 0.34779 | -2.82805 |
| 16279 | LEKR1     | -2.71621 | -12.7814 | 0.028534 | 0.34722 | -2.82433 |
| 2489  | NEBL-AS1  | -2.80735 | -26.1331 | 6.97E-05 | 0.03386 | 0.79884  |
| 9713  | ES3L-AAF  | -2.80735 | -26.1331 | 6.97E-05 | 0.03386 | 0.79884  |
| 14895 | IC1001285 | -2.80735 | -26.1331 | 6.97E-05 | 0.03386 | 0.79884  |
| 755   | FOXE3     | -2.80735 | -20.4907 | 0.001346 | 0.11938 | -1.01428 |
| 1773  | TNFSF18   | -2.80735 | -20.4907 | 0.001346 | 0.11938 | -1.01428 |
| 2305  | LOC14913  | -2.80735 | -20.4907 | 0.001346 | 0.11938 | -1.01428 |
| 3651  | SLC5A12   | -2.80735 | -20.4907 | 0.001346 | 0.11938 | -1.01428 |
| 4998  | PTPRO     | -2.80735 | -20.4907 | 0.001346 | 0.11938 | -1.01428 |
| 11294 | ZNF98     | -2.80735 | -20.4907 | 0.001346 | 0.11938 | -1.01428 |
| 13136 | LCT       | -2.80735 | -20.4907 | 0.001346 | 0.11938 | -1.01428 |
| 13672 | SCARNA5   | -2.80735 | -20.4907 | 0.001346 | 0.11938 | -1.01428 |
| 15959 | CD200R1   | -2.80735 | -20.4907 | 0.001346 | 0.11938 | -1.01428 |
| 23175 | RAB40AL   | -2.80735 | -20.4907 | 0.001346 | 0.11938 | -1.01428 |
| 183   | DRAXIN    | -2.80735 | -13.2103 | 0.027393 | 0.34437 | -2.81426 |
| 968   | CLCA1     | -2.80735 | -13.2103 | 0.027393 | 0.34437 | -2.81426 |
| 1075  | AMY2A     | -2.80735 | -13.2103 | 0.027393 | 0.34437 | -2.81426 |
| 1311  | HIST2H2AI | -2.80735 | -13.2103 | 0.027393 | 0.34437 | -2.81426 |
| 3391  | SNORA54   | -2.80735 | -13.2103 | 0.027393 | 0.34437 | -2.81426 |
| 3737  | Zp779M0   | -2.80735 | -13.2103 | 0.027393 | 0.34437 | -2.81426 |
| 4108  | MIR612    | -2.80735 | -13.2103 | 0.027393 | 0.34437 | -2.81426 |
| 5005  | SKP1P2    | -2.80735 | -13.2103 | 0.027393 | 0.34437 | -2.81426 |
| 5271  | AMHR2     | -2.80735 | -13.2103 | 0.027393 | 0.34437 | -2.81426 |
| 6114  | LINC0033C | -2.80735 | -13.2103 | 0.027393 | 0.34437 | -2.81426 |
| 6778  | ACTN1-AS  | -2.80735 | -13.2103 | 0.027393 | 0.34437 | -2.81426 |
| 6835  | SYNDIG1L  | -2.80735 | -13.2103 | 0.027393 | 0.34437 | -2.81426 |
| 7746  | CPLX3     | -2.80735 | -13.2103 | 0.027393 | 0.34437 | -2.81426 |
| 8337  | VWA3A     | -2.80735 | -13.2103 | 0.027393 | 0.34437 | -2.81426 |
| 8947  | DOC2B     | -2.80735 | -13.2103 | 0.027393 | 0.34437 | -2.81426 |
| 9365  | VTN       | -2.80735 | -13.2103 | 0.027393 | 0.34437 | -2.81426 |
| 9700  | RAMP2-AS  | -2.80735 | -13.2103 | 0.027393 | 0.34437 | -2.81426 |
| 10233 | MIR4730   | -2.80735 | -13.2103 | 0.027393 | 0.34437 | -2.81426 |
| 10455 | WBP11P1   | -2.80735 | -13.2103 | 0.027393 | 0.34437 | -2.81426 |
| 10486 | LOC28426  | -2.80735 | -13.2103 | 0.027393 | 0.34437 | -2.81426 |
| 10844 | IC1001285 | -2.80735 | -13.2103 | 0.027393 | 0.34437 | -2.81426 |
| 12161 | TMEM190   | -2.80735 | -13.2103 | 0.027393 | 0.34437 | -2.81426 |
| 13710 | ESPNL     | -2.80735 | -13.2103 | 0.027393 | 0.34437 | -2.81426 |
| 14355 | IC1001278 | -2.80735 | -13.2103 | 0.027393 | 0.34437 | -2.81426 |
| 15033 | TMPRSS6   | -2.80735 | -13.2103 | 0.027393 | 0.34437 | -2.81426 |
| 15663 | GNAT1     | -2.80735 | -13.2103 | 0.027393 | 0.34437 | -2.81426 |
| 16779 | LOC34496  | -2.80735 | -13.2103 | 0.027393 | 0.34437 | -2.81426 |
| 16881 | SYT14L    | -2.80735 | -13.2103 | 0.027393 | 0.34437 | -2.81426 |
| 16883 | IPRSS11B  | -2.80735 | -13.2103 | 0.027393 | 0.34437 | -2.81426 |
| 17973 | SOWAHA    | -2.80735 | -13.2103 | 0.027393 | 0.34437 | -2.81426 |
| 18344 | C5orf47   | -2.80735 | -13.2103 | 0.027393 | 0.34437 | -2.81426 |
| 19173 | MIR30C2   | -2.80735 | -13.2103 | 0.027393 | 0.34437 | -2.81426 |



|       |            |          |          |          |         |          |
|-------|------------|----------|----------|----------|---------|----------|
| 19511 | ZC2HC1B    | -2.80735 | -13.2103 | 0.027393 | 0.34437 | -2.81426 |
| 20387 | POLR2J2    | -2.80735 | -13.2103 | 0.027393 | 0.34437 | -2.81426 |
| 20885 | TDH        | -2.80735 | -13.2103 | 0.027393 | 0.34437 | -2.81426 |
| 5525  | PTPRQ      | -2.81401 | -7.82233 | 0.003276 | 0.16501 | -0.95663 |
| 3317  | MIR210     | -2.82424 | -15.9943 | 0.00234  | 0.14743 | -1.14623 |
| 6863  | ESRRB      | -2.84539 | -2.94947 | 0.039032 | 0.37765 | -3.7571  |
| 20736 | KCNH2      | -2.92821 | -13.4255 | 0.000594 | 0.09199 | 0.13788  |
| 4937  | TAS2R10    | -2.98864 | -11.933  | 0.004487 | 0.1973  | -1.38365 |
| 9567  | PNMT       | -2.98864 | -11.933  | 0.004487 | 0.1973  | -1.38365 |
| 19599 | SNORA20    | -2.98864 | -11.933  | 0.004487 | 0.1973  | -1.38365 |
| 22445 | SNORD36    | -2.98864 | -11.933  | 0.004487 | 0.1973  | -1.38365 |
| 8828  | DYNLRB2    | -3.16993 | -14.9164 | 0.02357  | 0.34271 | -2.78177 |
| 10493 | SIGLEC15   | -3.16993 | -14.9164 | 0.02357  | 0.34271 | -2.78177 |
| 18601 | HIST1H2AI  | -3.16993 | -14.9164 | 0.02357  | 0.34271 | -2.78177 |
| 19103 | CRISP3     | -3.17387 | -5.41999 | 0.01004  | 0.26597 | -1.96144 |
| 11487 | LOC64366   | -3.2049  | -5.0585  | 0.01232  | 0.28394 | -2.16438 |
| 20910 | FAM86B2    | -3.33568 | -3.98665 | 0.024426 | 0.34437 | -2.8752  |
| 14701 | SSR4P1     | -3.35073 | -3.19123 | 0.030528 | 0.35431 | -3.489   |
| 10318 | CLUL1      | -3.35712 | -5.16167 | 0.027793 | 0.34501 | -2.69271 |
| 14393 | FNFRSF6E   | -3.35712 | -5.16167 | 0.027793 | 0.34501 | -2.69271 |
| 7237  | SNORD116   | -3.40368 | -4.84083 | 0.031804 | 0.35525 | -2.82725 |
| 12605 | C2orf73    | -3.40368 | -4.84083 | 0.031804 | 0.35525 | -2.82725 |
| 14019 | TSPY26P    | -3.40368 | -4.84083 | 0.031804 | 0.35525 | -2.82725 |
| 16326 | TERC       | -3.40368 | -4.84083 | 0.031804 | 0.35525 | -2.82725 |
| 16471 | UTS2D      | -3.40368 | -4.84083 | 0.031804 | 0.35525 | -2.82725 |
| 21709 | IFNB1      | -3.40368 | -4.84083 | 0.031804 | 0.35525 | -2.82725 |
| 15557 | CCR3       | -3.5072  | -3.1756  | 0.04513  | 0.39318 | -3.54156 |
| 17030 | HSD17B13   | -3.57142 | -5.84499 | 0.008007 | 0.24676 | -1.74311 |
| 9028  | ATP2A3     | -3.58496 | -7.18203 | 0.013692 | 0.29288 | -2.06566 |
| 19818 | STK31      | -3.58496 | -7.18203 | 0.013692 | 0.29288 | -2.06566 |
| 16261 | HGEF26A    | -3.73322 | -4.93682 | 0.013234 | 0.28831 | -2.23655 |
| 20141 | STAG3L1    | -3.90689 | -18.3843 | 0.018191 | 0.31367 | -2.73989 |
| 21837 | LOC15837   | -3.90689 | -18.3843 | 0.018191 | 0.31367 | -2.73989 |
| 21929 | LOC1005072 | -3.90689 | -18.3843 | 0.018191 | 0.31367 | -2.73989 |
| 17370 | SPATA4     | -3.95345 | -26.8567 | 0.000735 | 0.09825 | -0.9216  |
| 1114  | MIR197     | -4       | -18.8224 | 0.017668 | 0.31081 | -2.73609 |
| 10907 | CCL25      | -4       | -18.8224 | 0.017668 | 0.31081 | -2.73609 |
| 12660 | LOC33980   | -4       | -18.8224 | 0.017668 | 0.31081 | -2.73609 |
| 15165 | ATP5L2     | -4       | -18.8224 | 0.017668 | 0.31081 | -2.73609 |
| 20268 | BHLHA15    | -4       | -18.8224 | 0.017668 | 0.31081 | -2.73609 |
| 14313 | MIR296     | -4.16096 | -18.0023 | 0.001797 | 0.12981 | -1.07654 |
| 951   | C1orf180   | -4.27537 | -9.55116 | 0.007338 | 0.23571 | -1.63777 |
| 18041 | SNORD63    | -4.32193 | -20.3373 | 0.01605  | 0.30627 | -2.72472 |
| 10501 | ST8SIA5    | -4.35727 | -3.51718 | 0.034447 | 0.365   | -3.24607 |
| 1456  | NUP210L    | -4.45943 | -20.9843 | 0.015439 | 0.30253 | -2.72056 |
| 6436  | RNASE6     | -4.45943 | -20.9843 | 0.015439 | 0.30253 | -2.72056 |
| 13366 | C2orf88    | -4.49728 | -5.70437 | 0.008616 | 0.25187 | -1.81306 |
| 18210 | PDGFRB     | -5.52356 | -25.9917 | 0.011838 | 0.27794 | -2.69788 |
