# Supplementary material for: Network Pharmacology Reveals That Resveratrol Can Alleviate COVID-19-Related Hyperinflammation
Source: Hindawi journal article supplement (doi:10.1155/2021/4129993), 2021-09-22
Supplement: f3 [file 4129993.f3.pdf]

## Resveratrol-related targets GO analysis enriched terms

| Category                | Term       | Description                                                              | P         | InTerm_InList |
|-------------------------|------------|--------------------------------------------------------------------------|-----------|---------------|
| GO Molecular Functions  | GO:0004672 | protein kinase activity                                                  | 9.196E-48 | 64/606        |
| GO Molecular Functions  | GO:0016773 | phosphotransferase activity, alcohol group as acceptor                   | 1.054E-45 | 66/711        |
| GO Biological Processes | GO:0018105 | peptidyl-serine phosphorylation                                          | 4.604E-44 | 48/303        |
| GO Biological Processes | GO:0018209 | peptidyl-serine modification                                             | 7.759E-44 | 49/326        |
| GO Molecular Functions  | GO:0016301 | kinase activity                                                          | 2.791E-43 | 66/776        |
| GO Molecular Functions  | GO:0004674 | protein serine/threonine kinase activity                                 | 4.906E-29 | 42/446        |
| GO Biological Processes | GO:0018107 | peptidyl-threonine phosphorylation                                       | 9.105E-24 | 23/116        |
| GO Biological Processes | GO:0018210 | peptidyl-threonine modification                                          | 4.635E-23 | 23/124        |
| GO Biological Processes | GO:1901699 | cellular response to nitrogen compound                                   | 1.971E-45 | 64/660        |
| GO Biological Processes | GO:0032870 | cellular response to hormone stimulus                                    | 4.916E-40 | 61/712        |
| GO Biological Processes | GO:0071417 | cellular response to organonitrogen compound                             | 6.679E-40 | 57/597        |
| GO Biological Processes | GO:1901652 | response to peptide                                                      | 4.977E-29 | 45/534        |
| GO Biological Processes | GO:1901653 | cellular response to peptide                                             | 2.274E-24 | 36/397        |
| GO Biological Processes | GO:0043434 | response to peptide hormone                                              | 9.631E-23 | 36/443        |
| GO Biological Processes | GO:0071375 | cellular response to peptide hormone stimulus                            | 1.187E-21 | 31/327        |
| GO Biological Processes | GO:0032868 | response to insulin                                                      | 4.675E-17 | 25/279        |
| GO Biological Processes | GO:0032869 | cellular response to insulin stimulus                                    | 5.078E-16 | 22/223        |
| GO Biological Processes | GO:0008286 | insulin receptor signaling pathway                                       | 6.818E-14 | 17/145        |
| GO Biological Processes | GO:0007169 | transmembrane receptor protein tyrosine kinase signaling pathway         | 3.002E-40 | 62/737        |
| GO Biological Processes | GO:0070848 | response to growth factor                                                | 1.068E-19 | 41/736        |
| GO Biological Processes | GO:0071363 | cellular response to growth factor stimulus                              | 1.241E-18 | 39/706        |
| GO Biological Processes | GO:0071559 | response to transforming growth factor beta                              | 3.046E-08 | 15/253        |
| GO Biological Processes | GO:0071560 | cellular response to transforming growth factor beta stimulus            | 1E-06     | 13/247        |
| GO Biological Processes | GO:0090287 | regulation of cellular response to growth factor stimulus                | 7.3E-06   | 13/296        |
| GO Biological Processes | GO:0007178 | transmembrane receptor protein serine/threonine kinase signaling pathway | 1.14E-05  | 14/356        |
| GO Biological Processes | GO:0007179 | transforming growth factor beta receptor signaling pathway               | 0.0001408 | 9/197         |
| GO Biological Processes | GO:0071407 | cellular response to organic cyclic compound                             | 1.768E-37 | 53/544        |
| GO Biological Processes | GO:0071396 | cellular response to lipid                                               | 1.962E-29 | 48/616        |
| GO Biological Processes | GO:0048545 | response to steroid hormone                                              | 6.865E-26 | 37/386        |

|                         |            |                                                                                                                                                      |           |        |
|-------------------------|------------|------------------------------------------------------------------------------------------------------------------------------------------------------|-----------|--------|
| GO Molecular Functions  | GO:0098531 | transcription factor activity, direct ligand regulated sequence-specific DNA binding                                                                 | 4.422E-21 | 16/47  |
| GO Molecular Functions  | GO:0004879 | nuclear receptor activity                                                                                                                            | 4.422E-21 | 16/47  |
| GO Molecular Functions  | GO:0003707 | steroid hormone receptor activity                                                                                                                    | 1.134E-19 | 16/56  |
| GO Biological Processes | GO:0030522 | intracellular receptor signaling pathway cellular response to steroid hormone stimulus                                                               | 4.391E-19 | 27/282 |
| GO Biological Processes | GO:0071383 | steroid hormone mediated signaling pathway                                                                                                           | 3.054E-18 | 25/249 |
| GO Biological Processes | GO:0043401 | hormone-mediated signaling pathway                                                                                                                   | 9.762E-17 | 21/182 |
| GO Biological Processes | GO:0009755 | carboxylic acid binding                                                                                                                              | 1.483E-14 | 21/233 |
| GO Molecular Functions  | GO:0031406 | organic acid binding                                                                                                                                 | 5.46E-14  | 20/220 |
| GO Molecular Functions  | GO:0043177 | transcription factor binding transcription initiation from RNA polymerase II promoter                                                                | 1.495E-13 | 20/232 |
| GO Molecular Functions  | GO:0008134 | monocarboxylic acid binding                                                                                                                          | 2.42E-12  | 30/659 |
| GO Biological Processes | GO:0006367 | DNA-templated transcription, initiation                                                                                                              | 6.335E-12 | 17/191 |
| GO Molecular Functions  | GO:0033293 | lipid binding                                                                                                                                        | 1.141E-11 | 12/77  |
| GO Biological Processes | GO:0006352 | nuclear receptor transcription coactivator activity                                                                                                  | 5.321E-10 | 17/253 |
| GO Molecular Functions  | GO:0008289 | steroid binding                                                                                                                                      | 6.404E-09 | 27/755 |
| GO Molecular Functions  | GO:0030374 | transcription factor complex                                                                                                                         | 2.004E-08 | 9/68   |
| GO Molecular Functions  | GO:0005496 | transcription coactivator activity RNA polymerase II proximal promoter sequence-specific DNA binding proximal promoter sequence-specific DNA binding | 3.806E-07 | 9/95   |
| GO Cellular Components  | GO:0005667 | RNA polymerase II transcription factor complex                                                                                                       | 5.433E-07 | 16/360 |
| GO Molecular Functions  | GO:0003713 | transcription coregulator activity                                                                                                                   | 4.499E-06 | 14/328 |
| GO Molecular Functions  | GO:0000978 | nuclear transcription factor complex                                                                                                                 | 8.012E-06 | 19/604 |
| GO Molecular Functions  | GO:0000987 | response to wounding                                                                                                                                 | 1.413E-05 | 19/629 |
| GO Cellular Components  | GO:0090575 | wound healing                                                                                                                                        | 3.116E-05 | 9/162  |
| GO Molecular Functions  | GO:0003712 | regulation of body fluid levels                                                                                                                      | 7.216E-05 | 17/590 |
| GO Cellular Components  | GO:0044798 | blood coagulation                                                                                                                                    | 0.0001638 | 9/201  |
| GO Biological Processes | GO:0009611 | hemostasis                                                                                                                                           | 2.379E-35 | 56/691 |
| GO Biological Processes | GO:0042060 | coagulation                                                                                                                                          | 1.057E-29 | 47/576 |
| GO Biological Processes | GO:0050878 | platelet activation                                                                                                                                  | 8.413E-27 | 42/507 |
| GO Biological Processes | GO:0007596 | circulatory system process                                                                                                                           | 1.724E-23 | 33/336 |
| GO Biological Processes | GO:0007599 |                                                                                                                                                      | 2.76E-23  | 33/341 |
| GO Biological Processes | GO:0050817 |                                                                                                                                                      | 3.03E-23  | 33/342 |
| GO Biological Processes | GO:0030168 |                                                                                                                                                      | 5.139E-17 | 20/154 |
| GO Biological Processes | GO:0003013 |                                                                                                                                                      | 1.036E-33 | 50/554 |

|                         |            |                                                    |           |        |
|-------------------------|------------|----------------------------------------------------|-----------|--------|
| GO Biological Processes | GO:0008015 | blood circulation                                  | 5.495E-33 | 49/544 |
| GO Biological Processes | GO:0044057 | regulation of system process                       | 2.018E-24 | 43/617 |
| GO Biological Processes | GO:1903522 | regulation of blood circulation                    | 1.665E-20 | 29/301 |
| GO Biological Processes | GO:0003015 | heart process                                      | 1.616E-16 | 25/294 |
| GO Biological Processes | GO:0060047 | heart contraction                                  | 7.967E-15 | 23/284 |
| GO Biological Processes | GO:0003012 | muscle system process                              | 6.914E-13 | 26/462 |
| GO Biological Processes | GO:0090257 | regulation of muscle system process                | 1.017E-12 | 20/257 |
| GO Biological Processes | GO:0008016 | regulation of heart contraction                    | 6.796E-11 | 18/254 |
| GO Biological Processes | GO:0006936 | muscle contraction                                 | 4.231E-10 | 20/359 |
| GO Biological Processes | GO:0060048 | cardiac muscle contraction                         | 1.122E-08 | 12/138 |
| GO Biological Processes | GO:0006937 | regulation of muscle contraction                   | 1.303E-07 | 12/172 |
| GO Biological Processes | GO:0006941 | striated muscle contraction                        | 1.675E-07 | 12/176 |
| GO Biological Processes | GO:1903523 | negative regulation of blood circulation           | 1.692E-06 | 6/38   |
| GO Biological Processes | GO:0045822 | negative regulation of heart contraction           | 8.196E-06 | 5/29   |
| GO Biological Processes | GO:0055117 | regulation of cardiac muscle contraction           | 1.543E-05 | 7/82   |
| GO Biological Processes | GO:0006942 | regulation of striated muscle contraction          | 4.608E-05 | 7/97   |
| GO Biological Processes | GO:0045932 | negative regulation of muscle contraction          | 0.0001488 | 4/28   |
| GO Biological Processes | GO:0030335 | positive regulation of cell migration              | 1.738E-33 | 50/560 |
| GO Biological Processes | GO:0040017 | positive regulation of locomotion                  | 1.046E-32 | 51/612 |
| GO Biological Processes | GO:2000147 | positive regulation of cell motility               | 1.296E-32 | 50/584 |
| GO Biological Processes | GO:0051272 | positive regulation of cellular component movement | 5.081E-32 | 50/601 |
| GO Biological Processes | GO:0001568 | blood vessel development                           | 2.854E-22 | 45/777 |
| GO Biological Processes | GO:0048514 | blood vessel morphogenesis                         | 7.689E-20 | 40/690 |
| GO Biological Processes | GO:0001525 | angiogenesis                                       | 2.012E-19 | 37/594 |
| GO Biological Processes | GO:0050673 | epithelial cell proliferation                      | 6.847E-14 | 27/455 |
| GO Biological Processes | GO:0010631 | epithelial cell migration                          | 1.402E-13 | 24/359 |
| GO Biological Processes | GO:0001667 | ameboidal-type cell migration                      | 1.644E-13 | 27/472 |
| GO Biological Processes | GO:0090132 | epithelium migration                               | 1.679E-13 | 24/362 |
| GO Biological Processes | GO:0090130 | tissue migration                                   | 2.399E-13 | 24/368 |
| GO Biological Processes | GO:0050678 | regulation of epithelial cell proliferation        | 1.161E-12 | 24/396 |
| GO Biological Processes | GO:1901342 | regulation of vasculature development              | 1.179E-12 | 25/434 |

|                         |            |                                                                 |           |        |
|-------------------------|------------|-----------------------------------------------------------------|-----------|--------|
| GO Biological Processes | GO:0010634 | positive regulation of epithelial cell migration                | 1.532E-12 | 17/175 |
| GO Biological Processes | GO:0001936 | regulation of endothelial cell proliferation                    | 3.465E-12 | 17/184 |
| GO Biological Processes | GO:0043542 | endothelial cell migration                                      | 4.942E-12 | 20/280 |
| GO Biological Processes | GO:0001935 | endothelial cell proliferation                                  | 1.327E-11 | 17/200 |
| GO Biological Processes | GO:0010632 | regulation of epithelial cell migration                         | 1.446E-11 | 20/297 |
| GO Biological Processes | GO:0050679 | positive regulation of epithelial cell proliferation            | 2.889E-11 | 17/210 |
| GO Biological Processes | GO:0010595 | positive regulation of endothelial cell migration               | 4.126E-11 | 14/131 |
| GO Biological Processes | GO:0045765 | regulation of angiogenesis                                      | 4.715E-11 | 22/392 |
| GO Biological Processes | GO:0010594 | regulation of endothelial cell migration                        | 1.587E-10 | 17/234 |
| GO Biological Processes | GO:0045766 | positive regulation of angiogenesis                             | 2.078E-10 | 16/206 |
| GO Biological Processes | GO:0043536 | positive regulation of blood vessel endothelial cell migration  | 3.395E-10 | 11/80  |
| GO Biological Processes | GO:0001938 | positive regulation of endothelial cell proliferation           | 1.017E-09 | 12/112 |
| GO Biological Processes | GO:1904018 | positive regulation of vasculature development                  | 1.269E-09 | 16/233 |
| GO Biological Processes | GO:0043534 | blood vessel endothelial cell migration                         | 3.124E-08 | 13/183 |
| GO Biological Processes | GO:0043535 | regulation of blood vessel endothelial cell migration           | 5.487E-08 | 12/159 |
| GO Biological Processes | GO:0002040 | sprouting angiogenesis                                          | 2.491E-06 | 11/188 |
| GO Biological Processes | GO:1903672 | positive regulation of sprouting angiogenesis                   | 3.25E-06  | 7/65   |
| GO Biological Processes | GO:0051347 | positive regulation of transferase activity                     | 3.255E-33 | 54/692 |
| GO Biological Processes | GO:0033674 | positive regulation of kinase activity                          | 1.132E-32 | 51/613 |
| GO Biological Processes | GO:0045860 | positive regulation of protein kinase activity                  | 8.951E-28 | 44/540 |
| GO Biological Processes | GO:0071900 | regulation of protein serine/threonine kinase activity          | 4.202E-26 | 42/528 |
| GO Biological Processes | GO:0043410 | positive regulation of MAPK cascade                             | 2.406E-24 | 41/552 |
| GO Biological Processes | GO:0043408 | regulation of MAPK cascade                                      | 1.07E-23  | 46/754 |
| GO Biological Processes | GO:0071902 | positive regulation of protein serine/threonine kinase activity | 4.904E-21 | 31/343 |
| GO Biological Processes | GO:0043405 | regulation of MAP kinase activity                               | 6.683E-19 | 29/344 |
| GO Biological Processes | GO:0032147 | activation of protein kinase activity                           | 3.495E-18 | 28/335 |
| GO Biological Processes | GO:0043406 | positive regulation of MAP kinase activity                      | 1.141E-17 | 25/263 |
| GO Biological Processes | GO:0070371 | ERK1 and ERK2 cascade                                           | 2.09E-15  | 25/328 |
| GO Biological Processes | GO:0070372 | regulation of ERK1 and ERK2 cascade                             | 3.456E-12 | 21/308 |
| GO Biological Processes | GO:0070374 | positive regulation of ERK1 and ERK2 cascade                    | 5.613E-11 | 17/219 |
| GO Biological Processes | GO:0000187 | activation of MAPK activity                                     | 3.465E-07 | 11/154 |
| GO Biological Processes | GO:0048511 | rhythmic process                                                | 2.039E-32 | 39/299 |

|                         |            |                                                   |           |        |
|-------------------------|------------|---------------------------------------------------|-----------|--------|
| GO Biological Processes | GO:0007623 | circadian rhythm                                  | 6.348E-25 | 29/211 |
| GO Biological Processes | GO:0042752 | regulation of circadian rhythm                    | 2.459E-14 | 16/115 |
| GO Biological Processes | GO:0010035 | response to inorganic substance                   | 4.136E-30 | 47/564 |
| GO Biological Processes | GO:0010038 | response to metal ion                             | 2.867E-17 | 28/363 |
| GO Biological Processes | GO:0071241 | cellular response to inorganic substance          | 5.613E-11 | 17/219 |
| GO Biological Processes | GO:0046686 | response to cadmium ion                           | 5.997E-10 | 10/64  |
| GO Biological Processes | GO:0071248 | cellular response to metal ion                    | 6.642E-10 | 15/191 |
| GO Biological Processes | GO:0071276 | cellular response to cadmium ion                  | 2.708E-09 | 8/38   |
| GO Biological Processes | GO:0002237 | response to molecule of bacterial origin          | 2.221E-29 | 39/358 |
| GO Biological Processes | GO:0032496 | response to lipopolysaccharide                    | 3.793E-29 | 38/338 |
| GO Biological Processes | GO:0009617 | response to bacterium                             | 2.172E-23 | 45/729 |
| GO Biological Processes | GO:1903530 | regulation of secretion by cell                   | 7.522E-19 | 41/777 |
| GO Biological Processes | GO:0071216 | cellular response to biotic stimulus              | 3.054E-18 | 25/249 |
| GO Biological Processes | GO:0071219 | cellular response to molecule of bacterial origin | 6.135E-16 | 22/225 |
| GO Biological Processes | GO:0071222 | cellular response to lipopolysaccharide           | 2.219E-15 | 21/212 |
| GO Biological Processes | GO:0001817 | regulation of cytokine production                 | 5.334E-13 | 33/755 |
| GO Biological Processes | GO:0002790 | peptide secretion                                 | 9.086E-12 | 29/649 |
| GO Biological Processes | GO:0002791 | regulation of peptide secretion                   | 9.927E-12 | 26/520 |
| GO Biological Processes | GO:0009306 | protein secretion                                 | 1.326E-11 | 28/614 |
| GO Biological Processes | GO:0050708 | regulation of protein secretion                   | 1.804E-11 | 25/492 |
| GO Biological Processes | GO:0051047 | positive regulation of secretion                  | 5.778E-11 | 23/436 |
| GO Biological Processes | GO:1903532 | positive regulation of secretion by cell          | 9.246E-11 | 22/406 |
| GO Biological Processes | GO:0002793 | positive regulation of peptide secretion          | 1.023E-10 | 19/295 |
| GO Biological Processes | GO:0001819 | positive regulation of cytokine production        | 2.24E-10  | 23/467 |
| GO Biological Processes | GO:0050714 | positive regulation of protein secretion          | 2.345E-10 | 18/274 |
| GO Biological Processes | GO:0050663 | cytokine secretion                                | 2.282E-07 | 14/255 |
| GO Biological Processes | GO:0050715 | positive regulation of cytokine secretion         | 1.358E-06 | 10/142 |
| GO Biological Processes | GO:0050707 | regulation of cytokine secretion                  | 1.38E-05  | 11/225 |
| GO Molecular Functions  | GO:0019901 | protein kinase binding                            | 2.856E-29 | 49/654 |
| GO Molecular Functions  | GO:0019900 | kinase binding                                    | 9.789E-29 | 51/741 |
| GO Biological Processes | GO:0010942 | positive regulation of cell death                 | 8.619E-29 | 51/739 |

|                         |            |                                                                                           |           |        |
|-------------------------|------------|-------------------------------------------------------------------------------------------|-----------|--------|
| GO Biological Processes | GO:0043065 | positive regulation of apoptotic process                                                  | 1.189E-24 | 45/679 |
| GO Biological Processes | GO:0043068 | positive regulation of programmed cell death                                              | 2.043E-24 | 45/688 |
| GO Biological Processes | GO:0051345 | positive regulation of hydrolase activity                                                 | 3.224E-17 | 39/777 |
| GO Biological Processes | GO:0045862 | positive regulation of proteolysis                                                        | 4.712E-17 | 28/370 |
| GO Biological Processes | GO:2000116 | regulation of cysteine-type endopeptidase activity                                        | 2.191E-15 | 22/239 |
| GO Biological Processes | GO:0052547 | regulation of peptidase activity                                                          | 1.21E-14  | 28/460 |
| GO Biological Processes | GO:0052548 | regulation of endopeptidase activity                                                      | 1.659E-14 | 27/429 |
| GO Biological Processes | GO:0043281 | regulation of cysteine-type endopeptidase activity involved in apoptotic process          | 3.522E-14 | 20/215 |
| GO Biological Processes | GO:0010952 | positive regulation of peptidase activity                                                 | 1.327E-11 | 17/200 |
| GO Biological Processes | GO:2001056 | positive regulation of cysteine-type endopeptidase activity                               | 2.803E-10 | 14/151 |
| GO Biological Processes | GO:0010950 | positive regulation of endopeptidase activity                                             | 2.894E-10 | 15/180 |
| GO Biological Processes | GO:0043280 | positive regulation of cysteine-type endopeptidase activity involved in apoptotic process | 8.036E-09 | 12/134 |
| GO Biological Processes | GO:0006919 | activation of cysteine-type endopeptidase activity involved in apoptotic process          | 2.166E-07 | 9/89   |
| GO Biological Processes | GO:0070997 | neuron death                                                                              | 2.376E-28 | 38/355 |
| GO Biological Processes | GO:1901214 | regulation of neuron death                                                                | 2.954E-24 | 33/318 |
| GO Biological Processes | GO:0051402 | neuron apoptotic process                                                                  | 8.839E-21 | 27/243 |
| GO Biological Processes | GO:0043523 | regulation of neuron apoptotic process                                                    | 1.42E-17  | 23/213 |
| GO Biological Processes | GO:1901215 | negative regulation of neuron death                                                       | 2.827E-12 | 18/210 |
| GO Biological Processes | GO:0043524 | negative regulation of neuron apoptotic process                                           | 2.4E-09   | 13/148 |
| GO Biological Processes | GO:0035690 | cellular response to drug                                                                 | 2.005E-27 | 38/376 |
| GO Biological Processes | GO:0000302 | response to reactive oxygen species                                                       | 5.675E-26 | 31/236 |
| GO Biological Processes | GO:0006979 | response to oxidative stress                                                              | 2.391E-25 | 39/458 |
| GO Biological Processes | GO:0009636 | response to toxic substance                                                               | 6.321E-24 | 40/533 |
| GO Biological Processes | GO:0034614 | cellular response to reactive oxygen species                                              | 1.141E-23 | 26/170 |
| GO Biological Processes | GO:0034599 | cellular response to oxidative stress                                                     | 1.629E-23 | 32/309 |
| GO Biological Processes | GO:0046677 | response to antibiotic                                                                    | 1.705E-21 | 31/331 |
| GO Biological Processes | GO:0097237 | cellular response to toxic substance                                                      | 6.549E-13 | 20/251 |
| GO Biological Processes | GO:0042542 | response to hydrogen peroxide                                                             | 1.451E-11 | 15/146 |
| GO Biological Processes | GO:0071236 | cellular response to antibiotic                                                           | 2.607E-09 | 13/149 |
| GO Biological Processes | GO:0070301 | cellular response to hydrogen peroxide                                                    | 3.87E-09  | 11/100 |

|                         |            |                                                                                   |           |        |
|-------------------------|------------|-----------------------------------------------------------------------------------|-----------|--------|
| GO Biological Processes | GO:0046777 | protein autophosphorylation                                                       | 2.719E-27 | 32/235 |
| GO Molecular Functions  | GO:0004713 | protein tyrosine kinase activity                                                  | 4.881E-26 | 26/139 |
| GO Biological Processes | GO:0018108 | peptidyl-tyrosine phosphorylation                                                 | 2.18E-25  | 36/371 |
| GO Biological Processes | GO:0018212 | peptidyl-tyrosine modification                                                    | 2.884E-25 | 36/374 |
| GO Molecular Functions  | GO:0004715 | non-membrane spanning protein tyrosine kinase activity                            | 8.385E-18 | 14/46  |
| GO Biological Processes | GO:0038083 | peptidyl-tyrosine autophosphorylation                                             | 2.833E-14 | 11/36  |
| GO Biological Processes | GO:0050730 | regulation of peptidyl-tyrosine phosphorylation                                   | 1.174E-12 | 20/259 |
| GO Biological Processes | GO:0050731 | positive regulation of peptidyl-tyrosine phosphorylation                          | 8.488E-11 | 16/194 |
| GO Molecular Functions  | GO:0070851 | growth factor receptor binding                                                    | 7.975E-07 | 10/134 |
| GO Biological Processes | GO:0061098 | positive regulation of protein tyrosine kinase activity                           | 1.166E-06 | 7/56   |
| GO Biological Processes | GO:0061097 | regulation of protein tyrosine kinase activity                                    | 2.554E-06 | 8/89   |
| GO Biological Processes | GO:0097190 | apoptotic signaling pathway                                                       | 1.13E-26  | 45/607 |
| GO Biological Processes | GO:2001233 | regulation of apoptotic signaling pathway                                         | 7.301E-22 | 34/408 |
| GO Biological Processes | GO:0097191 | extrinsic apoptotic signaling pathway                                             | 1.008E-21 | 27/224 |
| GO Biological Processes | GO:2001234 | negative regulation of apoptotic signaling pathway                                | 6.08E-19  | 25/233 |
| GO Biological Processes | GO:2001237 | negative regulation of extrinsic apoptotic signaling pathway                      | 1.429E-17 | 18/106 |
| GO Biological Processes | GO:2001236 | regulation of extrinsic apoptotic signaling pathway                               | 7.559E-17 | 20/157 |
| GO Biological Processes | GO:0038034 | signal transduction in absence of ligand                                          | 3.723E-16 | 15/73  |
| GO Biological Processes | GO:0097192 | extrinsic apoptotic signaling pathway in absence of ligand                        | 3.723E-16 | 15/73  |
| GO Biological Processes | GO:2001239 | regulation of extrinsic apoptotic signaling pathway in absence of ligand          | 6.616E-10 | 9/47   |
| GO Biological Processes | GO:2001240 | negative regulation of extrinsic apoptotic signaling pathway in absence of ligand | 4.951E-08 | 7/36   |
| GO Biological Processes | GO:1901099 | negative regulation of signal transduction in absence of ligand                   | 4.951E-08 | 7/36   |
| GO Biological Processes | GO:0030155 | regulation of cell adhesion                                                       | 1.608E-26 | 48/716 |
| GO Biological Processes | GO:0022407 | regulation of cell-cell adhesion                                                  | 2.165E-19 | 32/422 |
| GO Biological Processes | GO:0007159 | leukocyte cell-cell adhesion                                                      | 1.026E-17 | 28/349 |
| GO Biological Processes | GO:0006909 | phagocytosis                                                                      | 5.419E-17 | 28/372 |
| GO Biological Processes | GO:0045785 | positive regulation of cell adhesion                                              | 1.122E-16 | 29/416 |
| GO Biological Processes | GO:0046649 | lymphocyte activation                                                             | 3.659E-16 | 37/748 |
| GO Biological Processes | GO:0042110 | T cell activation                                                                 | 3.973E-16 | 30/472 |
| GO Biological Processes | GO:0002764 | immune response-regulating signaling pathway                                      | 7.92E-16  | 35/681 |
| GO Biological Processes | GO:1903037 | regulation of leukocyte cell-cell adhesion                                        | 8.159E-16 | 25/315 |

|                         |            |                                                                                                                               |           |        |
|-------------------------|------------|-------------------------------------------------------------------------------------------------------------------------------|-----------|--------|
| GO Biological Processes | GO:0038093 | Fc receptor signaling pathway<br>immune response-activating signal<br>transduction                                            | 2.61E-15  | 22/241 |
| GO Biological Processes | GO:0002757 |                                                                                                                               | 7.135E-15 | 33/647 |
| GO Biological Processes | GO:0002253 | activation of immune response                                                                                                 | 3.885E-14 | 34/731 |
| GO Biological Processes | GO:0032990 | cell part morphogenesis                                                                                                       | 5.6E-14   | 33/696 |
| GO Biological Processes | GO:0048812 | neuron projection morphogenesis<br>cell morphogenesis involved in<br>differentiation                                          | 7.016E-14 | 32/658 |
| GO Biological Processes | GO:0000904 |                                                                                                                               | 1.016E-13 | 34/756 |
| GO Biological Processes | GO:0120039 | plasma membrane bounded cell<br>projection morphogenesis                                                                      | 1.244E-13 | 32/672 |
| GO Biological Processes | GO:0050865 | regulation of cell activation                                                                                                 | 1.425E-13 | 31/632 |
| GO Biological Processes | GO:0048858 | cell projection morphogenesis<br>immune response-regulating cell surface<br>receptor signaling pathway                        | 1.462E-13 | 32/676 |
| GO Biological Processes | GO:0002768 |                                                                                                                               | 1.479E-13 | 28/509 |
| GO Biological Processes | GO:0061564 | axon development<br>immune response-activating cell surface<br>receptor signaling pathway                                     | 3.297E-13 | 28/526 |
| GO Biological Processes | GO:0002429 |                                                                                                                               | 1.363E-12 | 26/476 |
| GO Biological Processes | GO:0022409 | positive regulation of cell-cell adhesion<br>Fc-gamma receptor signaling pathway                                              | 2.366E-12 | 20/269 |
| GO Biological Processes | GO:0038096 | involved in phagocytosis<br>immune response-regulating cell surface<br>receptor signaling pathway involved in<br>phagocytosis | 7.093E-12 | 15/139 |
| GO Biological Processes | GO:0002433 |                                                                                                                               | 7.093E-12 | 15/139 |
| GO Biological Processes | GO:0050863 | regulation of T cell activation                                                                                               | 7.583E-12 | 21/321 |
| GO Biological Processes | GO:0038094 | Fc-gamma receptor signaling pathway                                                                                           | 9.687E-12 | 15/142 |
| GO Biological Processes | GO:0007409 | axonogenesis<br>positive regulation of leukocyte cell-cell<br>adhesion                                                        | 9.692E-12 | 25/478 |
| GO Biological Processes | GO:1903039 |                                                                                                                               | 9.759E-12 | 18/226 |
| GO Biological Processes | GO:0002431 | Fc receptor mediated stimulatory<br>signaling pathway<br>cell morphogenesis involved in neuron<br>differentiation             | 1.187E-11 | 15/144 |
| GO Biological Processes | GO:0048667 |                                                                                                                               | 3.958E-11 | 27/598 |
| GO Biological Processes | GO:0051249 | regulation of lymphocyte activation                                                                                           | 1.562E-10 | 24/501 |
| GO Biological Processes | GO:0002694 | regulation of leukocyte activation                                                                                            | 7.607E-10 | 25/588 |
| GO Biological Processes | GO:0007411 | axon guidance                                                                                                                 | 2.497E-09 | 17/280 |
| GO Biological Processes | GO:0097485 | neuron projection guidance                                                                                                    | 2.78E-09  | 17/282 |
| GO Biological Processes | GO:0038095 | Fc-epsilon receptor signaling pathway                                                                                         | 1.206E-08 | 13/169 |
| GO Biological Processes | GO:0050870 | positive regulation of T cell activation                                                                                      | 1.603E-08 | 14/206 |
| GO Biological Processes | GO:0031295 | T cell costimulation                                                                                                          | 6.766E-08 | 8/56   |
| GO Biological Processes | GO:0031294 | lymphocyte costimulation                                                                                                      | 7.805E-08 | 8/57   |
| GO Biological Processes | GO:0050867 | positive regulation of cell activation<br>positive regulation of lymphocyte<br>activation                                     | 1.081E-07 | 18/406 |
| GO Biological Processes | GO:0051251 |                                                                                                                               | 3.203E-07 | 16/346 |



|                         |            |                                                      |           |        |
|-------------------------|------------|------------------------------------------------------|-----------|--------|
| GO Biological Processes | GO:0050851 | antigen receptor-mediated signaling pathway          | 6.363E-07 | 15/320 |
| GO Biological Processes | GO:0002696 | positive regulation of leukocyte activation          | 1.604E-06 | 16/391 |
| GO Biological Processes | GO:0050852 | T cell receptor signaling pathway                    | 4.977E-06 | 11/202 |
| GO Biological Processes | GO:0006935 | chemotaxis                                           | 1.961E-26 | 46/649 |
| GO Biological Processes | GO:0042330 | taxis                                                | 2.235E-26 | 46/651 |
| GO Biological Processes | GO:0050900 | leukocyte migration                                  | 7.311E-26 | 41/504 |
| GO Biological Processes | GO:0032103 | positive regulation of response to external stimulus | 1.724E-16 | 26/325 |
| GO Biological Processes | GO:0060326 | cell chemotaxis                                      | 3.551E-16 | 25/304 |
| GO Biological Processes | GO:0002685 | regulation of leukocyte migration                    | 1.877E-12 | 18/205 |
| GO Biological Processes | GO:0050921 | positive regulation of chemotaxis                    | 5.737E-12 | 15/137 |
| GO Biological Processes | GO:0050920 | regulation of chemotaxis                             | 6.208E-12 | 18/220 |
| GO Biological Processes | GO:0030595 | leukocyte chemotaxis                                 | 6.692E-10 | 16/223 |
| GO Biological Processes | GO:0002687 | positive regulation of leukocyte migration           | 7.692E-10 | 13/135 |
| GO Biological Processes | GO:0097529 | myeloid leukocyte migration                          | 1.228E-06 | 12/212 |
| GO Biological Processes | GO:0002688 | regulation of leukocyte chemotaxis                   | 1.953E-05 | 8/117  |
| GO Biological Processes | GO:0002690 | positive regulation of leukocyte chemotaxis          | 2.64E-05  | 7/89   |
| GO Biological Processes | GO:0071677 | positive regulation of mononuclear cell migration    | 6.685E-05 | 4/23   |
| GO Biological Processes | GO:0071675 | regulation of mononuclear cell migration             | 7.429E-05 | 5/45   |
| GO Biological Processes | GO:0071674 | mononuclear cell migration                           | 0.0002823 | 6/92   |
| GO Biological Processes | GO:0019221 | cytokine-mediated signaling pathway                  | 2.4E-26   | 50/796 |
