# Supplementary material for: Network Pharmacology Reveals That Resveratrol Can Alleviate COVID-19-Related Hyperinflammation
Source: Hindawi journal article supplement (doi:10.1155/2021/4129993), 2021-09-22
Supplement: f4 [file 4129993.f4.pdf]

## SARS-CoV-2 DEGs GO analysis enriched terms

| Category                | Term       | Description                                              | P         | InTerm_InList |
|-------------------------|------------|----------------------------------------------------------|-----------|---------------|
| GO Biological Processes | GO:0019221 | cytokine-mediated signaling pathway                      | 2.051E-21 | 62/796        |
| GO Molecular Functions  | GO:0005125 | cytokine activity                                        | 1.87E-16  | 29/219        |
| GO Molecular Functions  | GO:0048018 | receptor ligand activity                                 | 1.086E-13 | 38/480        |
| GO Molecular Functions  | GO:0030545 | receptor regulator activity                              | 5.159E-13 | 39/530        |
| GO Biological Processes | GO:0030593 | neutrophil chemotaxis                                    | 5.769E-12 | 17/100        |
| GO Biological Processes | GO:0060326 | cell chemotaxis                                          | 5.88E-12  | 28/304        |
| GO Biological Processes | GO:0030595 | leukocyte chemotaxis                                     | 7.407E-12 | 24/223        |
| GO Biological Processes | GO:1990266 | neutrophil migration                                     | 7.932E-12 | 18/117        |
| GO Biological Processes | GO:0071621 | granulocyte chemotaxis                                   | 1.065E-11 | 18/119        |
| GO Biological Processes | GO:0006935 | chemotaxis                                               | 1.686E-11 | 41/649        |
| GO Biological Processes | GO:0097529 | myeloid leukocyte migration                              | 1.727E-11 | 23/212        |
| GO Biological Processes | GO:0042330 | taxis                                                    | 1.855E-11 | 41/651        |
| GO Biological Processes | GO:0097530 | granulocyte migration                                    | 2.02E-11  | 19/140        |
| GO Molecular Functions  | GO:0005126 | cytokine receptor binding                                | 3.81E-11  | 25/262        |
| GO Biological Processes | GO:0006959 | humoral immune response                                  | 2.875E-08 | 25/361        |
| GO Biological Processes | GO:0019730 | antimicrobial humoral response                           | 8.869E-08 | 14/123        |
| GO Biological Processes | GO:0061844 | antimicrobial humoral immune response                    | 1.195E-07 | 11/73         |
| GO Biological Processes | GO:0050900 | mediated by antimicrobial peptide<br>leukocyte migration | 1.283E-07 | 29/504        |
| GO Molecular Functions  | GO:0008009 | chemokine activity                                       | 2.96E-07  | 9/49          |
| GO Molecular Functions  | GO:0045236 | CXCR chemokine receptor binding                          | 6.706E-07 | 6/18          |
| GO Biological Processes | GO:1990868 | response to chemokine                                    | 2.225E-06 | 11/97         |
| GO Biological Processes | GO:1990869 | cellular response to chemokine                           | 2.225E-06 | 11/97         |
| GO Molecular Functions  | GO:0042379 | chemokine receptor binding                               | 5.849E-06 | 9/69          |
| GO Biological Processes | GO:0070098 | chemokine-mediated signaling pathway                     | 6.316E-06 | 10/88         |
| GO Molecular Functions  | GO:0001664 | G protein-coupled receptor binding                       | 0.0012012 | 14/287        |
| GO Biological Processes | GO:0032496 | response to lipopolysaccharide                           | 1.404E-11 | 29/338        |
| GO Biological Processes | GO:0071222 | cellular response to lipopolysaccharide                  | 1.727E-11 | 23/212        |
| GO Biological Processes | GO:0002237 | response to molecule of bacterial origin                 | 5.644E-11 | 29/358        |
| GO Biological Processes | GO:0071219 | cellular response to molecule of bacterial origin        | 5.833E-11 | 23/225        |
| GO Biological Processes | GO:0071216 | cellular response to biotic stimulus                     | 4.442E-10 | 23/249        |
| GO Biological Processes | GO:0009617 | response to bacterium                                    | 6.205E-09 | 39/729        |
| GO Biological Processes | GO:0071396 | cellular response to lipid                               | 2.885E-07 | 32/616        |
| GO Biological Processes | GO:0071347 | cellular response to interleukin-1                       | 1.812E-06 | 15/180        |
| GO Biological Processes | GO:0070555 | response to interleukin-1                                | 1.065E-05 | 15/208        |
| GO Biological Processes | GO:0070498 | interleukin-1-mediated signaling pathway                 | 0.00062   | 8/100         |

|                         |            |                                                                    |           |        |
|-------------------------|------------|--------------------------------------------------------------------|-----------|--------|
| GO Biological Processes | GO:0035690 | cellular response to drug                                          | 0.0055559 | 15/376 |
| GO Biological Processes | GO:0071407 | cellular response to organic cyclic compound                       | 0.0079701 | 19/544 |
| GO Biological Processes | GO:0051607 | defense response to virus                                          | 2.282E-09 | 22/248 |
| GO Biological Processes | GO:0060337 | type I interferon signaling pathway                                | 3.037E-09 | 14/95  |
| GO Biological Processes | GO:0071357 | cellular response to type I interferon                             | 3.037E-09 | 14/95  |
| GO Biological Processes | GO:0034340 | response to type I interferon                                      | 5.272E-09 | 14/99  |
| GO Biological Processes | GO:0009615 | response to virus                                                  | 2.711E-08 | 24/334 |
| GO Biological Processes | GO:0098542 | defense response to other organism                                 | 4.263E-08 | 33/596 |
| GO Biological Processes | GO:0034341 | response to interferon-gamma                                       | 6.158E-08 | 18/202 |
| GO Biological Processes | GO:0045071 | negative regulation of viral genome replication                    | 2.329E-07 | 10/62  |
| GO Biological Processes | GO:0045069 | regulation of viral genome replication                             | 3.716E-07 | 12/99  |
| GO Biological Processes | GO:1903901 | negative regulation of viral life cycle                            | 7.418E-07 | 11/87  |
| GO Biological Processes | GO:0048525 | negative regulation of viral process                               | 3.662E-06 | 11/102 |
| GO Biological Processes | GO:1903900 | regulation of viral life cycle                                     | 5.32E-06  | 13/149 |
| GO Biological Processes | GO:0019079 | viral genome replication                                           | 5.372E-06 | 12/127 |
| GO Biological Processes | GO:0071346 | cellular response to interferon-gamma                              | 1.006E-05 | 14/182 |
| GO Molecular Functions  | GO:0001730 | 2'-5'-oligoadenylate synthetase activity                           | 2.636E-05 | 3/4    |
| GO Biological Processes | GO:0043903 | regulation of symbiosis, encompassing mutualism through parasitism | 2.693E-05 | 15/225 |
| GO Biological Processes | GO:0050792 | regulation of viral process                                        | 4.712E-05 | 14/209 |
| GO Biological Processes | GO:0043900 | regulation of multi-organism process                               | 0.0001255 | 20/412 |
| GO Biological Processes | GO:0043901 | negative regulation of multi-organism process                      | 0.000137  | 12/176 |
| GO Biological Processes | GO:0060333 | interferon-gamma-mediated signaling pathway                        | 0.000328  | 8/91   |
| GO Biological Processes | GO:0060700 | regulation of ribonuclease activity                                | 0.0005158 | 3/9    |
| GO Biological Processes | GO:0019058 | viral life cycle                                                   | 0.0005896 | 16/330 |
| GO Biological Processes | GO:0032069 | regulation of nuclease activity                                    | 0.0078818 | 3/22   |
| GO Biological Processes | GO:2000147 | positive regulation of cell motility                               | 2.633E-08 | 33/584 |
| GO Biological Processes | GO:0030335 | positive regulation of cell migration                              | 3.323E-08 | 32/560 |
| GO Biological Processes | GO:0051272 | positive regulation of cellular component movement                 | 5.189E-08 | 33/601 |
| GO Biological Processes | GO:0040017 | positive regulation of locomotion                                  | 7.928E-08 | 33/612 |
| GO Biological Processes | GO:0001568 | blood vessel development                                           | 8.355E-05 | 31/777 |
| GO Biological Processes | GO:1904018 | positive regulation of vasculature development                     | 0.0001503 | 14/233 |
| GO Biological Processes | GO:0001525 | angiogenesis                                                       | 0.0004367 | 24/594 |
| GO Biological Processes | GO:0010634 | positive regulation of epithelial cell migration                   | 0.0005163 | 11/175 |
| GO Biological Processes | GO:0045766 | positive regulation of angiogenesis                                | 0.0005785 | 12/206 |
| GO Biological Processes | GO:0048514 | blood vessel morphogenesis                                         | 0.0007245 | 26/690 |
| GO Biological Processes | GO:0010595 | positive regulation of endothelial cell migration                  | 0.0008739 | 9/131  |

|                         |            |                                                                |           |        |
|-------------------------|------------|----------------------------------------------------------------|-----------|--------|
| GO Biological Processes | GO:1901342 | regulation of vasculature development                          | 0.0016541 | 18/434 |
| GO Biological Processes | GO:0043536 | positive regulation of blood vessel endothelial cell migration | 0.0040573 | 6/80   |
| GO Biological Processes | GO:0045765 | regulation of angiogenesis                                     | 0.0080195 | 15/392 |
| GO Biological Processes | GO:0007159 | leukocyte cell-cell adhesion                                   | 6.226E-08 | 24/349 |
| GO Biological Processes | GO:0045785 | positive regulation of cell adhesion                           | 1.504E-06 | 24/416 |
| GO Biological Processes | GO:0030155 | regulation of cell adhesion                                    | 2.633E-06 | 33/716 |
| GO Biological Processes | GO:1903037 | regulation of leukocyte cell-cell adhesion                     | 2.694E-06 | 20/315 |
| GO Biological Processes | GO:0022407 | regulation of cell-cell adhesion                               | 6.367E-06 | 23/422 |
| GO Biological Processes | GO:1903039 | positive regulation of leukocyte cell-cell adhesion            | 6.88E-06  | 16/226 |
| GO Biological Processes | GO:1903706 | regulation of hemopoiesis                                      | 7.189E-06 | 25/487 |
| GO Biological Processes | GO:1902105 | regulation of leukocyte differentiation                        | 7.499E-06 | 18/281 |
| GO Biological Processes | GO:0002521 | leukocyte differentiation                                      | 8.06E-06  | 26/522 |
| GO Biological Processes | GO:0050865 | regulation of cell activation                                  | 1.165E-05 | 29/632 |
| GO Biological Processes | GO:0050863 | regulation of T cell activation                                | 1.296E-05 | 19/321 |
| GO Biological Processes | GO:0022409 | positive regulation of cell-cell adhesion                      | 1.594E-05 | 17/269 |
| GO Biological Processes | GO:0045619 | regulation of lymphocyte differentiation                       | 2.503E-05 | 13/172 |
| GO Biological Processes | GO:0033089 | positive regulation of T cell differentiation in thymus        | 5.501E-05 | 4/12   |
| GO Biological Processes | GO:0002694 | regulation of leukocyte activation                             | 6.092E-05 | 26/588 |
| GO Biological Processes | GO:0045580 | regulation of T cell differentiation                           | 8.896E-05 | 11/143 |
| GO Biological Processes | GO:0051249 | regulation of lymphocyte activation                            | 9.255E-05 | 23/501 |
| GO Biological Processes | GO:0042110 | T cell activation                                              | 0.0001054 | 22/472 |
| GO Biological Processes | GO:0033081 | regulation of T cell differentiation in thymus                 | 0.0001112 | 5/26   |
| GO Biological Processes | GO:0050870 | positive regulation of T cell activation                       | 0.0001586 | 13/206 |
| GO Biological Processes | GO:0046649 | lymphocyte activation                                          | 0.0002282 | 29/748 |
| GO Biological Processes | GO:1903708 | positive regulation of hemopoiesis                             | 0.0003704 | 12/196 |
| GO Biological Processes | GO:0045582 | positive regulation of T cell differentiation                  | 0.0012156 | 7/86   |
| GO Biological Processes | GO:0030217 | T cell differentiation                                         | 0.0023748 | 12/243 |
| GO Biological Processes | GO:0045621 | positive regulation of lymphocyte differentiation              | 0.0024363 | 7/97   |
| GO Biological Processes | GO:1902107 | positive regulation of leukocyte differentiation               | 0.0024546 | 9/152  |
| GO Biological Processes | GO:0030098 | lymphocyte differentiation                                     | 0.0032892 | 15/355 |
| GO Biological Processes | GO:0050867 | positive regulation of cell activation                         | 0.0047865 | 16/406 |
| GO Biological Processes | GO:0002696 | positive regulation of leukocyte activation                    | 0.0078437 | 15/391 |
| GO Biological Processes | GO:0032103 | positive regulation of response to external stimulus           | 2.902E-07 | 22/325 |

|                         |            |                                                                                                                   |           |        |
|-------------------------|------------|-------------------------------------------------------------------------------------------------------------------|-----------|--------|
| GO Biological Processes | GO:0050727 | regulation of inflammatory response<br>positive regulation of DNA-binding transcription<br>factor activity        | 5.044E-07 | 28/508 |
| GO Biological Processes | GO:0051091 | positive regulation of inflammatory response<br>positive regulation of NF-kappaB transcription<br>factor activity | 8.397E-07 | 19/266 |
| GO Biological Processes | GO:0050729 | regulation of NIK/NF-kappaB signaling                                                                             | 1.123E-06 | 14/151 |
| GO Biological Processes | GO:0051092 | regulation of NIK/NF-kappaB signaling<br>regulation of DNA-binding transcription factor<br>activity               | 1.316E-06 | 14/153 |
| GO Biological Processes | GO:0038061 | positive regulation of NIK/NF-kappaB signaling                                                                    | 2.914E-06 | 15/187 |
| GO Biological Processes | GO:1901222 | regulation of NIK/NF-kappaB signaling<br>regulation of DNA-binding transcription factor<br>activity               | 2.966E-06 | 12/120 |
| GO Biological Processes | GO:0051090 | positive regulation of NIK/NF-kappaB signaling                                                                    | 1.249E-05 | 23/440 |
| GO Biological Processes | GO:1901224 | I-kappaB kinase/NF-kappaB signaling<br>regulation of I-kappaB kinase/NF-kappaB<br>signaling                       | 1.62E-05  | 9/78   |
| GO Biological Processes | GO:0007249 | positive regulation of I-kappaB kinase/NF-<br>kappaB signaling                                                    | 0.0002965 | 15/279 |
| GO Biological Processes | GO:0043122 | regulation of peptidyl-tyrosine phosphorylation<br>positive regulation of peptidyl-tyrosine<br>phosphorylation    | 0.0008318 | 13/245 |
| GO Biological Processes | GO:0043123 | peptidyl-tyrosine phosphorylation                                                                                 | 0.0087695 | 9/185  |
| GO Biological Processes | GO:0050730 | peptidyl-tyrosine phosphorylation                                                                                 | 5.606E-07 | 19/259 |
| GO Biological Processes | GO:0050731 | peptidyl-tyrosine phosphorylation                                                                                 | 9.452E-07 | 16/194 |
| GO Biological Processes | GO:0018108 | peptidyl-tyrosine modification<br>positive regulation of tyrosine phosphorylation<br>of STAT protein              | 2.969E-05 | 20/371 |
| GO Biological Processes | GO:0018212 | myeloid leukocyte differentiation<br>regulation of tyrosine phosphorylation of STAT<br>protein                    | 3.326E-05 | 20/374 |
| GO Biological Processes | GO:0042531 | JAK-STAT cascade                                                                                                  | 6.968E-05 | 8/73   |
| GO Biological Processes | GO:0002573 | tyrosine phosphorylation of STAT protein                                                                          | 0.0001745 | 13/208 |
| GO Biological Processes | GO:0042509 | positive regulation of JAK-STAT cascade                                                                           | 0.0002049 | 8/85   |
| GO Biological Processes | GO:0007259 | regulation of JAK-STAT cascade                                                                                    | 0.0002402 | 11/160 |
| GO Biological Processes | GO:0007260 | STAT cascade                                                                                                      | 0.0002605 | 8/88   |
| GO Biological Processes | GO:0046427 | positive regulation of STAT cascade                                                                               | 0.0003534 | 8/92   |
| GO Biological Processes | GO:0046425 | regulation of STAT cascade                                                                                        | 0.0003564 | 10/141 |
| GO Biological Processes | GO:0097696 | growth factor activity                                                                                            | 0.0004041 | 11/170 |
| GO Biological Processes | GO:1904894 | embryonic placenta development                                                                                    | 0.0004394 | 8/95   |
| GO Biological Processes | GO:1904892 | placenta development                                                                                              | 0.0005812 | 10/150 |
| GO Molecular Functions  | GO:0008083 | regulation of myeloid cell differentiation                                                                        | 0.0010522 | 10/162 |
| GO Biological Processes | GO:0001892 | myeloid cell differentiation                                                                                      | 0.00169   | 7/91   |
| GO Biological Processes | GO:0001890 | regulation of myeloid leukocyte differentiation                                                                   | 0.0030502 | 9/157  |
| GO Biological Processes | GO:0045637 | cellular response to tumor necrosis factor                                                                        | 0.0038548 | 12/258 |
| GO Biological Processes | GO:0030099 | response to tumor necrosis factor                                                                                 | 0.0070043 | 16/423 |
| GO Biological Processes | GO:0002761 | regulation of myeloid leukocyte differentiation                                                                   | 0.0078169 | 7/120  |
| GO Biological Processes | GO:0071356 | cellular response to tumor necrosis factor                                                                        | 8.835E-07 | 20/293 |
| GO Biological Processes | GO:0034612 | response to tumor necrosis factor                                                                                 | 2.694E-06 | 20/315 |

|                         |            |                                                                     |           |        |
|-------------------------|------------|---------------------------------------------------------------------|-----------|--------|
| GO Biological Processes | GO:0033209 | tumor necrosis factor-mediated signaling pathway                    | 0.0003844 | 11/169 |
| GO Molecular Functions  | GO:0032813 | tumor necrosis factor receptor superfamily binding                  | 0.0015388 | 5/45   |
| GO Molecular Functions  | GO:0005164 | tumor necrosis factor receptor binding                              | 0.0026334 | 4/31   |
| GO Biological Processes | GO:0002526 | acute inflammatory response                                         | 1.223E-06 | 17/222 |
| GO Biological Processes | GO:0006953 | acute-phase response                                                | 2.501E-06 | 8/47   |
| GO Biological Processes | GO:0002675 | positive regulation of acute inflammatory response                  | 2.16E-05  | 6/31   |
| GO Biological Processes | GO:2000379 | positive regulation of reactive oxygen species metabolic process    | 2.568E-05 | 10/103 |
| GO Biological Processes | GO:1903428 | positive regulation of reactive oxygen species biosynthetic process | 9.55E-05  | 7/57   |
| GO Biological Processes | GO:0072593 | reactive oxygen species metabolic process                           | 0.0001195 | 16/286 |
| GO Biological Processes | GO:0034113 | heterotypic cell-cell adhesion                                      | 0.0001814 | 7/63   |
| GO Biological Processes | GO:0060558 | regulation of calcidiol 1-monooxygenase activity                    | 0.0002211 | 3/7    |
| GO Biological Processes | GO:0032602 | chemokine production                                                | 0.0003534 | 8/92   |
| GO Biological Processes | GO:0060556 | regulation of vitamin D biosynthetic process                        | 0.0005158 | 3/9    |
| GO Biological Processes | GO:0150076 | neuroinflammatory response                                          | 0.000581  | 7/76   |
| GO Biological Processes | GO:0001660 | fever generation                                                    | 0.0007265 | 3/10   |
| GO Biological Processes | GO:1903426 | regulation of reactive oxygen species biosynthetic process          | 0.000804  | 8/104  |
| GO Biological Processes | GO:0046209 | nitric oxide metabolic process                                      | 0.0009172 | 7/82   |
| GO Biological Processes | GO:0046886 | positive regulation of hormone biosynthetic process                 | 0.000985  | 3/11   |
| GO Biological Processes | GO:0032350 | regulation of hormone metabolic process                             | 0.0010039 | 5/41   |
| GO Biological Processes | GO:0072604 | interleukin-6 secretion                                             | 0.0010112 | 6/61   |
| GO Biological Processes | GO:0150077 | regulation of neuroinflammatory response                            | 0.0011221 | 5/42   |
| GO Biological Processes | GO:2001057 | reactive nitrogen species metabolic process                         | 0.0011348 | 7/85   |
| GO Biological Processes | GO:0045429 | positive regulation of nitric oxide biosynthetic process            | 0.0012503 | 5/43   |
| GO Biological Processes | GO:0001505 | regulation of neurotransmitter levels                               | 0.0012719 | 16/355 |
| GO Biological Processes | GO:0042368 | vitamin D biosynthetic process                                      | 0.001295  | 3/12   |
| GO Biological Processes | GO:2000377 | regulation of reactive oxygen species metabolic process             | 0.0013641 | 11/197 |
| GO Biological Processes | GO:1904407 | positive regulation of nitric oxide metabolic process               | 0.0013891 | 5/44   |
| GO Biological Processes | GO:0045428 | regulation of nitric oxide biosynthetic process                     | 0.0015291 | 6/66   |
| GO Biological Processes | GO:0030656 | regulation of vitamin metabolic process                             | 0.00166   | 3/13   |
| GO Biological Processes | GO:0046885 | regulation of hormone biosynthetic process                          | 0.0017916 | 4/28   |
| GO Biological Processes | GO:0010883 | regulation of lipid storage                                         | 0.0022583 | 5/49   |
| GO Biological Processes | GO:0019915 | lipid storage                                                       | 0.0025657 | 6/73   |
| GO Biological Processes | GO:0042362 | fat-soluble vitamin biosynthetic process                            | 0.0025679 | 3/15   |

|                         |            |                                                                        |           |        |
|-------------------------|------------|------------------------------------------------------------------------|-----------|--------|
| GO Biological Processes | GO:0045073 | regulation of chemokine biosynthetic process                           | 0.0025679 | 3/15   |
| GO Biological Processes | GO:0051044 | positive regulation of membrane protein ectodomain proteolysis         | 0.0025679 | 3/15   |
| GO Biological Processes | GO:1903409 | reactive oxygen species biosynthetic process                           | 0.0026092 | 8/125  |
| GO Biological Processes | GO:0006801 | superoxide metabolic process                                           | 0.0027485 | 6/74   |
| GO Biological Processes | GO:0032352 | positive regulation of hormone metabolic process                       | 0.0031165 | 3/16   |
| GO Biological Processes | GO:0034116 | positive regulation of heterotypic cell-cell adhesion                  | 0.0031165 | 3/16   |
| GO Biological Processes | GO:0042033 | chemokine biosynthetic process                                         | 0.0031165 | 3/16   |
| GO Biological Processes | GO:0050755 | chemokine metabolic process                                            | 0.0031165 | 3/16   |
| GO Biological Processes | GO:0014015 | positive regulation of gliogenesis                                     | 0.0031431 | 6/76   |
| GO Biological Processes | GO:1904994 | regulation of leukocyte adhesion to vascular endothelial cell          | 0.0033246 | 4/33   |
| GO Biological Processes | GO:0006809 | nitric oxide biosynthetic process                                      | 0.0033556 | 6/77   |
| GO Biological Processes | GO:0032675 | regulation of interleukin-6 production                                 | 0.0034588 | 9/160  |
| GO Biological Processes | GO:0002673 | regulation of acute inflammatory response                              | 0.0036042 | 9/161  |
| GO Biological Processes | GO:0031649 | heat generation                                                        | 0.0037317 | 3/17   |
| GO Biological Processes | GO:0010001 | glial cell differentiation                                             | 0.0038284 | 11/225 |
| GO Biological Processes | GO:0051353 | positive regulation of oxidoreductase activity                         | 0.0043859 | 5/57   |
| GO Biological Processes | GO:0150078 | positive regulation of neuroinflammatory response                      | 0.0044159 | 3/18   |
| GO Biological Processes | GO:2000778 | positive regulation of interleukin-6 secretion                         | 0.004578  | 4/36   |
| GO Biological Processes | GO:0032722 | positive regulation of chemokine production                            | 0.005086  | 5/59   |
| GO Biological Processes | GO:0061900 | glial cell activation                                                  | 0.005086  | 5/59   |
| GO Biological Processes | GO:0032635 | interleukin-6 production                                               | 0.0051391 | 9/170  |
| GO Biological Processes | GO:0002922 | positive regulation of humoral immune response                         | 0.0051712 | 3/19   |
| GO Biological Processes | GO:0060252 | positive regulation of glial cell proliferation                        | 0.0051712 | 3/19   |
| GO Biological Processes | GO:0032642 | regulation of chemokine production                                     | 0.00546   | 6/85   |
| GO Biological Processes | GO:0010829 | negative regulation of glucose transmembrane transport                 | 0.0069025 | 3/21   |
| GO Biological Processes | GO:0010888 | negative regulation of lipid storage                                   | 0.0069025 | 3/21   |
| GO Biological Processes | GO:0010893 | positive regulation of steroid biosynthetic process                    | 0.0069025 | 3/21   |
| GO Biological Processes | GO:1904996 | positive regulation of leukocyte adhesion to vascular endothelial cell | 0.0069025 | 3/21   |
| GO Biological Processes | GO:1905953 | negative regulation of lipid localization                              | 0.0071762 | 5/64   |
| GO Biological Processes | GO:0021782 | glial cell development                                                 | 0.0074789 | 7/119  |
| GO Biological Processes | GO:0042359 | vitamin D metabolic process                                            | 0.0078818 | 3/22   |
| GO Biological Processes | GO:0032755 | positive regulation of interleukin-6 production                        | 0.0079792 | 6/92   |
| GO Biological Processes | GO:0042133 | neurotransmitter metabolic process                                     | 0.0084036 | 8/152  |

|                         |            |                                                                                  |           |        |
|-------------------------|------------|----------------------------------------------------------------------------------|-----------|--------|
| GO Biological Processes | GO:0051043 | regulation of membrane protein ectodomain proteolysis                            | 0.0089389 | 3/23   |
| GO Biological Processes | GO:0045123 | cellular extravasation                                                           | 0.0092309 | 5/68   |
| GO Biological Processes | GO:0014002 | astrocyte development                                                            | 0.0093768 | 4/44   |
| GO Biological Processes | GO:0042116 | macrophage activation                                                            | 0.0097461 | 6/96   |
| GO Biological Processes | GO:0042108 | positive regulation of cytokine biosynthetic process                             | 0.0098017 | 5/69   |
| GO Molecular Functions  | GO:0017159 | pantetheine hydrolase activity                                                   | 6.684E-06 | 3/3    |
| GO Biological Processes | GO:0015939 | pantothenate metabolic process                                                   | 0.0002211 | 3/7    |
| GO Cellular Components  | GO:0031225 | anchored component of membrane                                                   | 0.0003473 | 11/167 |
| GO Biological Processes | GO:0006575 | cellular modified amino acid metabolic process                                   | 0.0063885 | 10/208 |
| GO Biological Processes | GO:0043410 | positive regulation of MAPK cascade                                              | 7.507E-06 | 27/552 |
| GO Biological Processes | GO:0043408 | regulation of MAPK cascade                                                       | 0.0002604 | 29/754 |
| GO Biological Processes | GO:0070372 | regulation of ERK1 and ERK2 cascade                                              | 0.0002771 | 16/308 |
| GO Biological Processes | GO:0070374 | positive regulation of ERK1 and ERK2 cascade                                     | 0.0002887 | 13/219 |
| GO Biological Processes | GO:0070371 | ERK1 and ERK2 cascade                                                            | 0.0005522 | 16/328 |
| GO Biological Processes | GO:0045860 | positive regulation of protein kinase activity                                   | 0.0034865 | 20/540 |
| GO Biological Processes | GO:0043406 | positive regulation of MAP kinase activity                                       | 0.0044872 | 12/263 |
| GO Biological Processes | GO:0071902 | positive regulation of protein serine/threonine kinase activity                  | 0.0059758 | 14/343 |
| GO Biological Processes | GO:0052548 | regulation of endopeptidase activity                                             | 8.317E-06 | 23/429 |
| GO Biological Processes | GO:0052547 | regulation of peptidase activity                                                 | 2.521E-05 | 23/460 |
| GO Biological Processes | GO:2000116 | regulation of cysteine-type endopeptidase activity                               | 0.0001958 | 14/239 |
| GO Biological Processes | GO:0043281 | regulation of cysteine-type endopeptidase activity involved in apoptotic process | 0.0008425 | 12/215 |
| GO Biological Processes | GO:0006919 | activation of cysteine-type endopeptidase activity involved in apoptotic process | 0.0068146 | 6/89   |
| GO Biological Processes | GO:0010950 | positive regulation of endopeptidase activity                                    | 0.0073925 | 9/180  |
| GO Biological Processes | GO:0010942 | positive regulation of cell death                                                | 0.0074426 | 24/739 |
| GO Biological Processes | GO:2001056 | positive regulation of cysteine-type endopeptidase activity                      | 0.0080905 | 8/151  |
| GO Biological Processes | GO:0002274 | myeloid leukocyte activation                                                     | 8.78E-06  | 30/656 |
| GO Biological Processes | GO:0002263 | cell activation involved in immune response                                      | 1.766E-05 | 31/715 |
| GO Biological Processes | GO:0042119 | neutrophil activation                                                            | 3.356E-05 | 24/501 |
| GO Biological Processes | GO:0002446 | neutrophil mediated immunity                                                     | 3.464E-05 | 24/502 |
| GO Biological Processes | GO:0002366 | leukocyte activation involved in immune response                                 | 3.985E-05 | 30/711 |
| GO Biological Processes | GO:0036230 | granulocyte activation                                                           | 4.053E-05 | 24/507 |
| GO Biological Processes | GO:0002444 | myeloid leukocyte mediated immunity                                              | 6.274E-05 | 25/555 |
| GO Biological Processes | GO:0045055 | regulated exocytosis                                                             | 0.0001289 | 31/796 |

|                         |            |                                                     |           |        |
|-------------------------|------------|-----------------------------------------------------|-----------|--------|
| GO Biological Processes | GO:0043312 | neutrophil degranulation                            | 0.0001692 | 22/488 |
| GO Biological Processes | GO:0002283 | neutrophil activation involved in immune response   | 0.0001844 | 22/491 |
| GO Biological Processes | GO:0043299 | leukocyte degranulation                             | 0.0002537 | 23/537 |
| GO Biological Processes | GO:0002275 | myeloid cell activation involved in immune response | 0.0003292 | 23/547 |
| GO Cellular Components  | GO:0030667 | secretory granule membrane                          | 0.00529   | 13/303 |
| GO Biological Processes | GO:0070268 | cornification                                       | 9.926E-06 | 11/113 |
| GO Biological Processes | GO:0043588 | skin development                                    | 0.0001522 | 20/418 |
| GO Biological Processes | GO:0030216 | keratinocyte differentiation                        | 0.0002223 | 16/302 |
| GO Biological Processes | GO:0030855 | epithelial cell differentiation                     | 0.0005103 | 29/786 |
| GO Biological Processes | GO:0009913 | epidermal cell differentiation                      | 0.0005417 | 17/360 |
| GO Biological Processes | GO:0008544 | epidermis development                               | 0.0006657 | 20/469 |
| GO Biological Processes | GO:0031424 | keratinization                                      | 0.0012466 | 12/225 |
| GO Cellular Components  | GO:0001533 | cornified envelope                                  | 0.0015388 | 5/45   |
| GO Biological Processes | GO:0002687 | positive regulation of leukocyte migration          | 1.009E-05 | 12/135 |
| GO Biological Processes | GO:0002685 | regulation of leukocyte migration                   | 3.815E-05 | 14/205 |
| GO Biological Processes | GO:0048247 | lymphocyte chemotaxis                               | 0.0002209 | 7/65   |
| GO Biological Processes | GO:0072676 | lymphocyte migration                                | 0.0003609 | 9/116  |
| GO Biological Processes | GO:2000403 | positive regulation of lymphocyte migration         | 0.0007043 | 5/38   |
| GO Biological Processes | GO:0050920 | regulation of chemotaxis                            | 0.0010281 | 12/220 |
| GO Biological Processes | GO:0050921 | positive regulation of chemotaxis                   | 0.0011997 | 9/137  |
| GO Biological Processes | GO:2000401 | regulation of lymphocyte migration                  | 0.0013022 | 6/64   |
| GO Biological Processes | GO:2000404 | regulation of T cell migration                      | 0.0013891 | 5/44   |
| GO Biological Processes | GO:0002690 | positive regulation of leukocyte chemotaxis         | 0.0014855 | 7/89   |
| GO Biological Processes | GO:0072678 | T cell migration                                    | 0.0016532 | 6/67   |
| GO Biological Processes | GO:0071624 | positive regulation of granulocyte chemotaxis       | 0.0017916 | 4/28   |
| GO Biological Processes | GO:1902624 | positive regulation of neutrophil migration         | 0.0026334 | 4/31   |
| GO Biological Processes | GO:2000406 | positive regulation of T cell migration             | 0.0026334 | 4/31   |
| GO Biological Processes | GO:0002688 | regulation of leukocyte chemotaxis                  | 0.0068353 | 7/117  |
| GO Biological Processes | GO:0140131 | positive regulation of lymphocyte chemotaxis        | 0.0069025 | 3/21   |
| GO Biological Processes | GO:1902622 | regulation of neutrophil migration                  | 0.0079622 | 4/42   |
| GO Biological Processes | GO:0045124 | regulation of bone resorption                       | 1.243E-05 | 7/42   |
| GO Biological Processes | GO:0046850 | regulation of bone remodeling                       | 3.533E-05 | 7/49   |
| GO Biological Processes | GO:0048871 | multicellular organismal homeostasis                | 6.053E-05 | 23/487 |
| GO Biological Processes | GO:0001894 | tissue homeostasis                                  | 0.0001143 | 14/227 |
| GO Biological Processes | GO:0045453 | bone resorption                                     | 0.0001814 | 7/63   |
| GO Biological Processes | GO:0034103 | regulation of tissue remodeling                     | 0.000328  | 8/91   |

|                         |            |                                                                                      |           |        |
|-------------------------|------------|--------------------------------------------------------------------------------------|-----------|--------|
| GO Biological Processes | GO:0046849 | bone remodeling                                                                      | 0.000328  | 8/91   |
| GO Biological Processes | GO:0048771 | tissue remodeling                                                                    | 0.000684  | 11/181 |
| GO Biological Processes | GO:0060249 | anatomical structure homeostasis                                                     | 0.0017833 | 18/437 |
| GO Biological Processes | GO:0030225 | macrophage differentiation                                                           | 1.709E-05 | 7/44   |
| GO Biological Processes | GO:0097154 | GABAergic neuron differentiation                                                     | 0.000108  | 4/14   |
| GO Biological Processes | GO:0021879 | forebrain neuron differentiation                                                     | 0.004063  | 5/56   |
| GO Biological Processes | GO:0045649 | regulation of macrophage differentiation                                             | 0.0078818 | 3/22   |
| GO Biological Processes | GO:0045746 | negative regulation of Notch signaling pathway                                       | 0.0093768 | 4/44   |
| GO Biological Processes | GO:0021872 | forebrain generation of neurons                                                      | 0.0098017 | 5/69   |
| GO Biological Processes | GO:0048661 | positive regulation of smooth muscle cell proliferation                              | 2.162E-05 | 10/101 |
| GO Biological Processes | GO:0048660 | regulation of smooth muscle cell proliferation                                       | 9.324E-05 | 12/169 |
| GO Biological Processes | GO:0048659 | smooth muscle cell proliferation                                                     | 0.0001043 | 12/171 |
| GO Biological Processes | GO:1904707 | positive regulation of vascular smooth muscle cell proliferation                     | 0.000308  | 6/49   |
| GO Biological Processes | GO:1904705 | regulation of vascular smooth muscle cell proliferation                              | 0.0011348 | 7/85   |
| GO Biological Processes | GO:1990874 | vascular smooth muscle cell proliferation                                            | 0.0011348 | 7/85   |
| GO Biological Processes | GO:0033002 | muscle cell proliferation                                                            | 0.0021437 | 12/240 |
| GO Biological Processes | GO:0071398 | cellular response to fatty acid                                                      | 0.0043859 | 5/57   |
| GO Biological Processes | GO:0000302 | response to reactive oxygen species                                                  | 0.0054567 | 11/236 |
| GO Biological Processes | GO:0070542 | response to fatty acid                                                               | 0.00611   | 6/87   |
| GO Biological Processes | GO:0097237 | cellular response to toxic substance                                                 | 0.0085069 | 11/251 |
| GO Biological Processes | GO:0030949 | positive regulation of vascular endothelial growth factor receptor signaling pathway | 2.191E-05 | 5/19   |
| GO Biological Processes | GO:0030947 | regulation of vascular endothelial growth factor receptor signaling pathway          | 0.0005456 | 5/36   |
| GO Biological Processes | GO:0048010 | vascular endothelial growth factor receptor signaling pathway                        | 0.0097461 | 6/96   |
| GO Biological Processes | GO:0001819 | positive regulation of cytokine production                                           | 3.188E-05 | 23/467 |
| GO Biological Processes | GO:0051047 | positive regulation of secretion                                                     | 3.288E-05 | 22/436 |
| GO Biological Processes | GO:1903532 | positive regulation of secretion by cell                                             | 0.0001031 | 20/406 |
| GO Biological Processes | GO:0050663 | cytokine secretion                                                                   | 0.0001116 | 15/255 |
| GO Biological Processes | GO:0001817 | regulation of cytokine production                                                    | 0.0001166 | 30/755 |
| GO Biological Processes | GO:0050707 | regulation of cytokine secretion                                                     | 0.0003743 | 13/225 |
| GO Biological Processes | GO:0050715 | positive regulation of cytokine secretion                                            | 0.000377  | 10/142 |
| GO Biological Processes | GO:1903530 | regulation of secretion by cell                                                      | 0.0004245 | 29/777 |
| GO Biological Processes | GO:0002793 | positive regulation of peptide secretion                                             | 0.0005323 | 15/295 |
| GO Biological Processes | GO:0051051 | negative regulation of transport                                                     | 0.0007211 | 22/543 |
| GO Biological Processes | GO:0050714 | positive regulation of protein secretion                                             | 0.0007702 | 14/274 |

|                         |            |                                          |           |        |
|-------------------------|------------|------------------------------------------|-----------|--------|
| GO Biological Processes | GO:0002790 | peptide secretion                        | 0.0031185 | 23/649 |
| GO Biological Processes | GO:1903531 | negative regulation of secretion by cell | 0.0033433 | 11/221 |
| GO Biological Processes | GO:0002791 | regulation of peptide secretion          | 0.0050166 | 19/520 |
| GO Biological Processes | GO:0050708 | regulation of protein secretion          | 0.0061385 | 18/492 |
| GO Biological Processes | GO:0009306 | protein secretion                        | 0.0068481 | 21/614 |
| GO Biological Processes | GO:0046888 | negative regulation of hormone secretion | 0.0071762 | 5/64   |
| GO Biological Processes | GO:0051222 | positive regulation of protein transport | 0.0074702 | 16/426 |
| GO Biological Processes | GO:0051048 | negative regulation of secretion         | 0.0075884 | 11/247 |
| GO Biological Processes | GO:0050709 | negative regulation of protein secretion | 0.0084036 | 8/152  |
