# Supplementary material for: Network Pharmacology Reveals That Resveratrol Can Alleviate COVID-19-Related Hyperinflammation
Source: Hindawi journal article supplement (doi:10.1155/2021/4129993), 2021-09-22
Supplement: f5 [file 4129993.f5.pdf]

## targets KEGG enriched terms

| Category     | Term     | Description                               | P          | InTerm_InList |
|--------------|----------|-------------------------------------------|------------|---------------|
| KEGG Pathway | hsa05200 | Pathways in cancer                        | 1.3124E-71 | 72/395        |
| KEGG Pathway | hsa04151 | PI3K-Akt signaling pathway                | 8.6568E-43 | 49/342        |
| KEGG Pathway | hsa05205 | Proteoglycans in cancer                   | 3.5979E-42 | 41/203        |
| KEGG Pathway | hsa05215 | Prostate cancer                           | 7.8907E-39 | 30/87         |
| KEGG Pathway | hsa04510 | Focal adhesion                            | 1.1767E-36 | 37/199        |
| KEGG Pathway | hsa01522 | Endocrine resistance                      | 1.3317E-35 | 29/96         |
| KEGG Pathway | hsa01521 | EGFR tyrosine kinase inhibitor resistance | 6.7344E-35 | 27/79         |
| KEGG Pathway | hsa04210 | Apoptosis                                 | 1.6551E-30 | 29/138        |
| KEGG Pathway | hsa04919 | Thyroid hormone signaling pathway         | 9.1582E-30 | 27/116        |
| KEGG Pathway | hsa04062 | Chemokine signaling pathway               | 1.4712E-29 | 31/182        |
| KEGG Pathway | hsa05212 | Pancreatic cancer                         | 1.1241E-28 | 22/64         |
| KEGG Pathway | hsa05161 | Hepatitis B                               | 1.7959E-28 | 28/144        |
| KEGG Pathway | hsa04015 | Rap1 signaling pathway                    | 1.4426E-27 | 31/210        |
| KEGG Pathway | hsa04014 | Ras signaling pathway                     | 1.6811E-26 | 31/227        |
| KEGG Pathway | hsa05145 | Toxoplasmosis                             | 1.5921E-25 | 24/113        |
| KEGG Pathway | hsa04012 | ErbB signaling pathway                    | 1.9717E-25 | 22/86         |
| KEGG Pathway | hsa04664 | Fc epsilon RI signaling pathway           | 1.3796E-24 | 20/68         |
| KEGG Pathway | hsa04917 | Prolactin signaling pathway               | 2.6737E-24 | 20/70         |
| KEGG Pathway | hsa04370 | VEGF signaling pathway                    | 2.8064E-24 | 19/59         |
| KEGG Pathway | hsa04914 | Progesterone-mediated oocyte maturation   | 2.8439E-24 | 22/96         |
| KEGG Pathway | hsa05222 | Small cell lung cancer                    | 4.3139E-24 | 21/84         |
| KEGG Pathway | hsa04380 | Osteoclast differentiation                | 5.7563E-24 | 24/130        |
| KEGG Pathway | hsa04810 | Regulation of actin cytoskeleton          | 1.3214E-23 | 28/212        |
| KEGG Pathway | hsa05214 | Glioma                                    | 1.6781E-23 | 19/64         |
| KEGG Pathway | hsa04722 | Neurotrophin signaling pathway            | 1.7012E-23 | 23/119        |
| KEGG Pathway | hsa04910 | Insulin signaling pathway                 | 2.5936E-23 | 24/138        |
| KEGG Pathway | hsa05221 | Acute myeloid leukemia                    | 3.3007E-23 | 18/55         |
| KEGG Pathway | hsa04668 | TNF signaling pathway                     | 4.684E-23  | 22/108        |
| KEGG Pathway | hsa05223 | Non-small cell lung cancer                | 1.0047E-22 | 18/58         |
| KEGG Pathway | hsa05220 | Chronic myeloid leukemia                  | 1.5713E-22 | 19/71         |
| KEGG Pathway | hsa04066 | HIF-1 signaling pathway                   | 2.9408E-22 | 21/101        |
| KEGG Pathway | hsa05160 | Hepatitis C                               | 4.1342E-21 | 22/131        |
| KEGG Pathway | hsa04915 | Estrogen signaling pathway                | 4.4505E-21 | 20/98         |
| KEGG Pathway | hsa04068 | FoxO signaling pathway                    | 4.919E-21  | 22/132        |
| KEGG Pathway | hsa05231 | Choline metabolism in cancer              | 5.5298E-21 | 20/99         |
| KEGG Pathway | hsa05210 | Colorectal cancer                         | 9.3259E-21 | 17/60         |
| KEGG Pathway | hsa04660 | T cell receptor signaling pathway         | 1.2858E-20 | 20/103        |
| KEGG Pathway | hsa04010 | MAPK signaling pathway                    | 3.1597E-20 | 27/255        |
| KEGG Pathway | hsa05230 | Central carbon metabolism in cancer       | 4.31E-20   | 17/65         |
| KEGG Pathway | hsa05218 | Melanoma                                  | 1.3299E-19 | 17/69         |
| KEGG Pathway | hsa05213 | Endometrial cancer                        | 7.019E-19  | 15/50         |
| KEGG Pathway | hsa05224 | Breast cancer                             | 7.0741E-19 | 21/144        |
| KEGG Pathway | hsa04140 | Autophagy - animal                        | 1.2048E-18 | 20/128        |
| KEGG Pathway | hsa05164 | Influenza A                               | 2.1103E-18 | 22/173        |
| KEGG Pathway | hsa05169 | Epstein-Barr virus infection              | 3.8377E-18 | 23/201        |
| KEGG Pathway | hsa05142 | Chagas disease (American trypanosomiasis) | 6.9415E-18 | 18/102        |
| KEGG Pathway | hsa04662 | B cell receptor signaling pathway         | 7.6652E-18 | 16/71         |
| KEGG Pathway | hsa04932 | Non-alcoholic fatty liver disease (NAFLD) | 2.6486E-17 | 20/149        |
| KEGG Pathway | hsa05152 | Tuberculosis                              | 6.9179E-17 | 21/179        |
| KEGG Pathway | hsa05166 | HTLV-I infection                          | 7.2444E-17 | 24/256        |
| KEGG Pathway | hsa01524 | Platinum drug resistance                  | 3.7227E-16 | 15/73         |
| KEGG Pathway | hsa04666 | Fc gamma R-mediated phagocytosis          | 5.2527E-16 | 16/91         |
| KEGG Pathway | hsa04150 | mTOR signaling pathway                    | 5.8006E-16 | 19/151        |
| KEGG Pathway | hsa05211 | Renal cell carcinoma                      | 1.8112E-15 | 14/65         |
| KEGG Pathway | hsa04620 | Toll-like receptor signaling pathway      | 4.787E-15  | 16/104        |
| KEGG Pathway | hsa04072 | Phospholipase D signaling pathway         | 5.0015E-15 | 18/146        |

|              |          |                                                            |            |        |
|--------------|----------|------------------------------------------------------------|------------|--------|
| KEGG Pathway | hsa04550 | Signaling pathways regulating pluripotency of stem cells   | 7.0926E-12 | 15/139 |
| KEGG Pathway | hsa05162 | Measles                                                    | 5.6143E-11 | 14/134 |
| KEGG Pathway | hsa04630 | Jak-STAT signaling pathway                                 | 4.3252E-10 | 14/156 |
| KEGG Pathway | hsa04933 | AGE-RAGE signaling pathway in diabetic complications       | 3.7218E-35 | 29/99  |
| KEGG Pathway | hsa05418 | Fluid shear stress and atherosclerosis                     | 1.183E-28  | 28/142 |
| KEGG Pathway | hsa04931 | Insulin resistance                                         | 1.2398E-24 | 23/107 |
| KEGG Pathway | hsa04920 | Adipocytokine signaling pathway                            | 4.4362E-15 | 14/69  |
| KEGG Pathway | hsa04930 | Type II diabetes mellitus                                  | 1.8805E-11 | 10/46  |
| KEGG Pathway | hsa04071 | Sphingolipid signaling pathway                             | 1.5182E-29 | 27/118 |
| KEGG Pathway | hsa04024 | cAMP signaling pathway                                     | 9.7317E-26 | 29/198 |
| KEGG Pathway | hsa04611 | Platelet activation                                        | 9.7184E-22 | 22/123 |
| KEGG Pathway | hsa04725 | Cholinergic synapse                                        | 1.7916E-18 | 19/112 |
| KEGG Pathway | hsa04371 | Apelin signaling pathway                                   | 1.0428E-16 | 19/138 |
| KEGG Pathway | hsa04022 | cGMP-PKG signaling pathway                                 | 4.7757E-13 | 17/163 |
| KEGG Pathway | hsa04261 | Adrenergic signaling in cardiomyocytes                     | 1.7561E-07 | 11/144 |
| KEGG Pathway | hsa05206 | MicroRNAs in cancer                                        | 8.0957E-23 | 31/299 |
| KEGG Pathway | hsa05203 | Viral carcinogenesis                                       | 2.5324E-19 | 24/201 |
| KEGG Pathway | hsa04110 | Cell cycle                                                 | 1.3181E-12 | 15/124 |
| KEGG Pathway | hsa04115 | p53 signaling pathway                                      | 1.2903E-09 | 10/69  |
| KEGG Pathway | hsa04080 | Neuroactive ligand-receptor interaction                    | 2.7581E-19 | 27/277 |
| KEGG Pathway | hsa04020 | Calcium signaling pathway                                  | 3.9835E-19 | 23/182 |
| KEGG Pathway | hsa04152 | AMPK signaling pathway                                     | 6.9564E-18 | 19/120 |
| KEGG Pathway | hsa04923 | Regulation of lipolysis in adipocytes                      | 3.9005E-15 | 13/54  |
| KEGG Pathway | hsa04213 | Longevity regulating pathway - multiple species            | 7.6262E-13 | 12/62  |
| KEGG Pathway | hsa04211 | Longevity regulating pathway                               | 6.6521E-11 | 12/89  |
| KEGG Pathway | hsa04922 | Glucagon signaling pathway                                 | 6.709E-08  | 10/103 |
| KEGG Pathway | hsa04973 | Carbohydrate digestion and absorption                      | 2.1275E-07 | 7/44   |
| KEGG Pathway | hsa04657 | IL-17 signaling pathway                                    | 3.1307E-17 | 17/93  |
| KEGG Pathway | hsa04659 | Th17 cell differentiation                                  | 7.6224E-15 | 16/107 |
| KEGG Pathway | hsa05131 | Shigellosis                                                | 5.2597E-14 | 13/65  |
| KEGG Pathway | hsa05120 | Epithelial cell signaling in Helicobacter pylori infection | 9.7925E-14 | 13/68  |
| KEGG Pathway | hsa04621 | NOD-like receptor signaling pathway                        | 9.5363E-13 | 17/170 |
| KEGG Pathway | hsa05133 | Pertussis                                                  | 1.92E-10   | 11/76  |
| KEGG Pathway | hsa05132 | Salmonella infection                                       | 7.5312E-10 | 11/86  |
| KEGG Pathway | hsa05140 | Leishmaniasis                                              | 2.279E-09  | 10/73  |
| KEGG Pathway | hsa04530 | Tight junction                                             | 1.1466E-07 | 12/170 |
| KEGG Pathway | hsa04658 | Th1 and Th2 cell differentiation                           | 2.8861E-07 | 9/92   |
| KEGG Pathway | hsa05168 | Herpes simplex infection                                   | 2.1305E-06 | 11/185 |
| KEGG Pathway | hsa04622 | RIG-I-like receptor signaling pathway                      | 5.3701E-06 | 7/70   |
| KEGG Pathway | hsa04137 | Mitophagy - animal                                         | 0.00042893 | 5/65   |
| KEGG Pathway | hsa04726 | Serotonergic synapse                                       | 4.7037E-17 | 18/113 |
| KEGG Pathway | hsa04540 | Gap junction                                               | 1.568E-13  | 14/88  |
| KEGG Pathway | hsa04912 | GnRH signaling pathway                                     | 2.9678E-13 | 14/92  |
| KEGG Pathway | hsa04270 | Vascular smooth muscle contraction                         | 1.3904E-11 | 14/121 |
| KEGG Pathway | hsa04921 | Oxytocin signaling pathway                                 | 3.0612E-10 | 14/152 |
| KEGG Pathway | hsa05034 | Alcoholism                                                 | 2.566E-08  | 13/180 |
| KEGG Pathway | hsa04730 | Long-term depression                                       | 1.1787E-07 | 8/60   |
| KEGG Pathway | hsa04720 | Long-term potentiation                                     | 2.8339E-07 | 8/67   |
| KEGG Pathway | hsa04713 | Circadian entrainment                                      | 4.523E-06  | 8/96   |
| KEGG Pathway | hsa04916 | Melanogenesis                                              | 6.612E-06  | 8/101  |
| KEGG Pathway | hsa04724 | Glutamatergic synapse                                      | 0.00519522 | 5/114  |
| KEGG Pathway | hsa04064 | NF-kappa B signaling pathway                               | 1.0754E-15 | 16/95  |
| KEGG Pathway | hsa04670 | Leukocyte transendothelial migration                       | 1.127E-15  | 17/114 |
| KEGG Pathway | hsa04360 | Axon guidance                                              | 1.2273E-13 | 18/175 |
| KEGG Pathway | hsa05100 | Bacterial invasion of epithelial cells                     | 7.5995E-07 | 8/76   |
| KEGG Pathway | hsa05130 | Pathogenic Escherichia coli infection                      | 1.0288E-06 | 7/55   |

|              |          |                                                           |            |        |
|--------------|----------|-----------------------------------------------------------|------------|--------|
| KEGG Pathway | hsa05219 | Bladder cancer                                            | 3.3375E-15 | 12/41  |
| KEGG Pathway | hsa05216 | Thyroid cancer                                            | 3.1326E-07 | 6/29   |
| KEGG Pathway | hsa04320 | Dorso-ventral axis formation                              | 6.8366E-06 | 5/28   |
| KEGG Pathway | hsa05020 | Prion diseases                                            | 0.00036073 | 4/35   |
| KEGG Pathway | hsa05202 | Transcriptional misregulation in cancer                   | 1.5525E-14 | 19/180 |
| KEGG Pathway | hsa04650 | Natural killer cell mediated cytotoxicity                 | 2.5182E-13 | 16/133 |
| KEGG Pathway | hsa05146 | Amoebiasis                                                | 3.404E-08  | 10/96  |
| KEGG Pathway | hsa04960 | Aldosterone-regulated sodium reabsorption                 | 1.4366E-06 | 6/37   |
| KEGG Pathway | hsa05010 | Alzheimer's disease                                       | 1.0499E-12 | 17/171 |
| KEGG Pathway | hsa04520 | Adherens junction                                         | 4.9791E-12 | 12/72  |
|              |          | Inflammatory mediator regulation of TRP channels          |            |        |
| KEGG Pathway | hsa04750 |                                                           | 1.1348E-11 | 13/97  |
| KEGG Pathway | hsa04723 | Retrograde endocannabinoid signaling                      | 6.4314E-07 | 9/101  |
| KEGG Pathway | hsa04310 | Wnt signaling pathway                                     | 1.4473E-06 | 10/143 |
| KEGG Pathway | hsa04972 | Pancreatic secretion                                      | 4.523E-06  | 8/96   |
| KEGG Pathway | hsa04971 | Gastric acid secretion                                    | 8.5324E-06 | 7/75   |
| KEGG Pathway | hsa04970 | Salivary secretion                                        | 2.8388E-05 | 7/90   |
|              |          | Endocrine and other factor-regulated calcium reabsorption |            |        |
| KEGG Pathway | hsa04961 |                                                           | 9.1804E-05 | 5/47   |
| KEGG Pathway | hsa04925 | Aldosterone synthesis and secretion                       | 0.00015029 | 6/82   |
| KEGG Pathway | hsa04911 | Insulin secretion                                         | 0.00018322 | 6/85   |
| KEGG Pathway | hsa05032 | Morphine addiction                                        | 0.00026606 | 6/91   |
| KEGG Pathway | hsa04215 | Apoptosis - multiple species                              | 2.1076E-11 | 9/33   |
| KEGG Pathway | hsa05014 | Amyotrophic lateral sclerosis (ALS)                       | 5.6495E-11 | 10/51  |
| KEGG Pathway | hsa05134 | Legionellosis                                             | 5.8484E-08 | 8/55   |
| KEGG Pathway | hsa05416 | Viral myocarditis                                         | 1.0301E-07 | 8/59   |
| KEGG Pathway | hsa05016 | Huntington's disease                                      | 0.00290332 | 7/193  |
| KEGG Pathway | hsa04728 | Dopaminergic synapse                                      | 3.717E-11  | 14/130 |
| KEGG Pathway | hsa05031 | Amphetamine addiction                                     | 3.185E-07  | 8/68   |
| KEGG Pathway | hsa05030 | Cocaine addiction                                         | 4.5761E-07 | 7/49   |
| KEGG Pathway | hsa00380 | Tryptophan metabolism                                     | 0.00688909 | 3/40   |
| KEGG Pathway | hsa00590 | Arachidonic acid metabolism                               | 4.3298E-10 | 10/62  |
