# Supplementary material for: Network Pharmacology Reveals That Resveratrol Can Alleviate COVID-19-Related Hyperinflammation
Source: Hindawi journal article supplement (doi:10.1155/2021/4129993), 2021-09-22
Supplement: f6 [file 4129993.f6.pdf]

## SARS-CoV-2 DEGs KEGG enriched terms

| Category     | Term     | Description                                          | P.value     | InTerm_InList |
|--------------|----------|------------------------------------------------------|-------------|---------------|
| KEGG Pathway | hsa04060 | Cytokine-cytokine receptor interaction               | 2.61742E-19 | 35/270        |
| KEGG Pathway | hsa04657 | IL-17 signaling pathway                              | 9.59366E-15 | 19/93         |
| KEGG Pathway | hsa04668 | TNF signaling pathway                                | 1.69723E-13 | 19/108        |
| KEGG Pathway | hsa05323 | Rheumatoid arthritis                                 | 1.19606E-11 | 16/90         |
| KEGG Pathway | hsa04621 | NOD-like receptor signaling pathway                  | 6.07599E-10 | 19/170        |
| KEGG Pathway | hsa05134 | Legionellosis                                        | 5.45103E-09 | 11/55         |
| KEGG Pathway | hsa05162 | Measles                                              | 5.30173E-09 | 16/134        |
| KEGG Pathway | hsa05164 | Influenza A                                          | 2.00359E-07 | 16/173        |
| KEGG Pathway | hsa05144 | Malaria                                              | 2.95966E-07 | 9/49          |
| KEGG Pathway | hsa05133 | Pertussis                                            | 1.63392E-06 | 10/76         |
| KEGG Pathway | hsa04064 | NF-kappa B signaling pathway                         | 1.8066E-06  | 11/95         |
| KEGG Pathway | hsa05140 | Leishmaniasis                                        | 9.37339E-06 | 9/73          |
| KEGG Pathway | hsa05146 | Amoebiasis                                           | 1.38036E-05 | 10/96         |
| KEGG Pathway | hsa05321 | Inflammatory bowel disease (IBD)                     | 2.98386E-05 | 8/65          |
| KEGG Pathway | hsa05132 | Salmonella infection                                 | 3.57713E-05 | 9/86          |
| KEGG Pathway | hsa05152 | Tuberculosis                                         | 3.80298E-05 | 13/179        |
| KEGG Pathway | hsa04630 | Jak-STAT signaling pathway                           | 4.29555E-05 | 12/156        |
| KEGG Pathway | hsa05168 | Herpes simplex infection                             | 5.35116E-05 | 13/185        |
| KEGG Pathway | hsa05418 | Fluid shear stress and atherosclerosis               | 8.35101E-05 | 11/142        |
| KEGG Pathway | hsa04640 | Hematopoietic cell lineage                           | 9.26294E-05 | 9/97          |
| KEGG Pathway | hsa04933 | AGE-RAGE signaling pathway in diabetic complications | 0.000108539 | 9/99          |
| KEGG Pathway | hsa04610 | Complement and coagulation cascades                  | 0.000122549 | 8/79          |
| KEGG Pathway | hsa04620 | Toll-like receptor signaling pathway                 | 0.000158585 | 9/104         |
| KEGG Pathway | hsa05202 | Transcriptional misregulation in cancer              | 0.000169209 | 12/180        |
| KEGG Pathway | hsa04380 | Osteoclast differentiation                           | 0.000184672 | 10/130        |
| KEGG Pathway | hsa05161 | Hepatitis B                                          | 0.000421378 | 10/144        |
| KEGG Pathway | hsa05143 | African trypanosomiasis                              | 0.000477149 | 5/35          |
| KEGG Pathway | hsa04015 | Rap1 signaling pathway                               | 0.000685656 | 12/210        |
| KEGG Pathway | hsa04062 | Chemokine signaling pathway                          | 0.000715913 | 11/182        |
| KEGG Pathway | hsa05160 | Hepatitis C                                          | 0.000873872 | 9/131         |

|              |          |                                           |             |        |
|--------------|----------|-------------------------------------------|-------------|--------|
| KEGG Pathway | hsa05142 | Chagas disease (American trypanosomiasis) | 0.003232988 | 7/102  |
| KEGG Pathway | hsa05150 | Staphylococcus aureus infection           | 0.004062958 | 5/56   |
| KEGG Pathway | hsa04931 | Insulin resistance                        | 0.004214676 | 7/107  |
| KEGG Pathway | hsa04670 | Leukocyte transendothelial migration      | 0.005948355 | 7/114  |
| KEGG Pathway | hsa05332 | Graft-versus-host disease                 | 0.00731079  | 4/41   |
| KEGG Pathway | hsa05219 | Bladder cancer                            | 0.00731079  | 4/41   |
| KEGG Pathway | hsa04664 | Fc epsilon RI signaling pathway           | 0.009230879 | 5/68   |
| KEGG Pathway | hsa04010 | MAPK signaling pathway                    | 0.00950931  | 11/255 |
| KEGG Pathway | hsa05166 | HTLV-I infection                          | 0.009773601 | 11/256 |
